# Supplementary material
Source: PubMed Central journal article supplement (PMC4277783)
Supplement: ja508477e_si_001.pdf [file ja508477e_si_001.pdf]

Supporting Information for:

## Biosynthesis of lycosantalol, a *cis*-prenyl derived diterpenoid

Jiachen Zi,<sup>†,‡</sup> Yuki Matsuba,<sup>‡</sup> Young J. Hong,<sup>§</sup> Alana J. Jackson,<sup>†</sup> Dean J. Tantillo,<sup>§</sup> Eran Pichersky<sup>‡</sup>  
and Reuben J. Peters<sup>\*†</sup>

### Content

Detailed materials and methods

Scheme S1. Reactions catalyzed by SICPT2.

Scheme S2. Reaction catalyzed by SITPS21 with **1**.

Scheme S3. C1-C6 cyclization with *transoid* versus *cisoid* isoprenyl diphosphate precursors.

Detailed results and discussion of QCC analysis.

Scheme S4. Computed geometries and energies for **B**→**E** conversion in the absence of PPI.

Scheme S5. Computed geometries and energies for **B**→**E** conversion in the presence of PPI.

Figure S1. The structures and numbering of NNOH and compounds **2-4**.

Figure S2. Selective correlations for NNOH (NOESY) and for **2-4** (<sup>1</sup>H-<sup>1</sup>H COSY and HMBC).

Table S1. NMR data for NNOH and GGOH (CDCl<sub>3</sub>, 700 MHz)

Table S2. NMR data of **2** (pyridine-d<sub>5</sub>, 700 MHz).

Table S3. NMR data of **3** (CDCl<sub>3</sub>, 700 MHz).

Table S4. NMR data of **4** (CDCl<sub>3</sub>, 700 MHz)

CYP71D51 synthetic gene sequence

Figure S3. Accurate EIMS of NNOH.

Figure S4. <sup>1</sup>H NMR spectrum of NNOH.

Figure S5. <sup>13</sup>C NMR spectrum of NNOH.

Figure S6. HSQC spectrum of NNOH.

Figure S7. HMBC of NNOH.

Figure S8. NOESY spectrum of NNOH.

Figure S9. <sup>1</sup>H NMR spectrum of GGOH.

Figure S10. <sup>13</sup>C NMR spectrum of GGOH.

Figure S11. NOESY spectrum of GGOH.

Figure S12. Accurate EIMS of lycosantalene (**2**).

Figure S13. <sup>1</sup>H NMR spectrum of **2**.

Figure S14. <sup>13</sup>C NMR spectrum of **2**.

Figure S15. <sup>1</sup>H-<sup>1</sup>H COSY spectrum of **2**.

Figure S16. HSQC spectrum of **2**.

Figure S17. HMBC spectrum of **2**.

Figure S18 Accurate EIMS of **3**.

Figure S19. <sup>1</sup>H NMR spectrum of **3**.

Figure S20. <sup>13</sup>C NMR spectrum of **3**.

Figure S21. <sup>1</sup>H-<sup>1</sup>H COSY spectrum of **3**.

Figure S22. HSQC spectrum of **3**.

Figure S23. HMBC spectrum of **3**.

Figure S24 Accurate EIMS of **4**.

Figure S25.  $^1\text{H}$  NMR spectrum of **4**.  
Figure S26.  $^{13}\text{C}$  NMR spectrum of **4**.  
Figure S27.  $^1\text{H}$ - $^1\text{H}$  COSY spectrum of **4**.  
Figure S28. HSQC spectrum of **4**.  
Figure S29. HMBC spectrum of **4**.  
Figure S30. GC-MS chromatogram of CYP71D51 activity with **2** in metabolic engineered *E. coli*.  
Figure S31. GC-MS chromatograms of in vitro assays of CYP71D51 with **2** or **3**.  
Figure S32. EIMS fragmentation of **4**.  
Figure S33. Comparison of MS spectrum for non-labeled versus mono- $^{18}\text{O}$  labeled and di- $^{18}\text{O}$  labeled **4** resulting from reaction of **3** or **2**, respectively, with CYP71D51 under  $^{18}\text{O}_2$ .  
Figure S34. Comparison of MS for **4** after incubation in unlabeled or  $^{18}\text{O}$ -labeled water.  
References  
Coordinates and Energies for detailed QCC analysis.

### **Detailed materials and methods**

**General.** Unless otherwise noted, chemicals were purchased from Fisher Scientific and molecular biology reagents from Invitrogen. Sequence analyses were carried out with the CLC Main Workbench 6.9 software package (CLCbio). Flash chromatography was carried out with a Reveleris iES system (Grace). HPLC separations were carried out with an Agilent 1100 series instrument equipped with fraction collector and diode array detector. Gas chromatography with mass spectrometric detection (GC-MS) analyses were performed using a Varian (Palo Alto, CA, USA) 3900 instrument with HP-5ms column and Saturn 2100 ion trap mass spectrometer in electron ionization (70 eV) mode. Samples (generally 1  $\mu\text{L}$ ) were injected in splitless mode at 50  $^\circ\text{C}$  and, after a 3 min. hold, the temperature raised at 14  $^\circ\text{C}/\text{min}$ . to 300  $^\circ\text{C}$ , where it was held for 3 min. MS data was collected from  $m/z$  from 90 to 600, starting 12 min. after the injection until the end of the run. High resolution MS spectra were acquired on a Waters Micromass GCT Premier Mass Spectrometer, employing the same GC conditions as above. 1D and 2D NMR spectra were recorded at 25  $^\circ\text{C}$  on a Bruker Avance 700 spectrometer equipped with a 5-mm HCN cryogenic probe. Structural analysis was carried out using standard proton, triple quantum filtered-COSY, HSQC, HMBC,  $^{13}\text{C}$ , and NOESY experiments. Optical rotation was measured at room temperature with a JASCO P-2000 digital polarimeter.

**Cloning.** To remove the plastid targeting leader peptide sequence, 52 and 44 amino acid residues were deleted from the N-termini of SICPT2 and SITPS21, respectively. A synthetic gene, with optimized codon usage for expression in *E. coli*, encoding CYP71D51 was obtained from Genscript. Each of these genes was cloned by directional topoisomerization into pENTR/SD/D-TOPO vectors, and the resulting constructs verified by full gene sequencing. This enabled facile transfer via direction recombination into a variety of DEST cassette containing expression vectors, both the commercially available pET-based pDEST constructs, and the previously described series of Duet vectors (Novagen) wherein the first multiple cloning site has been replaced by a DEST cassette.<sup>1</sup> However, initial expression studies with SICPT2 indicated that only the originally reported pEXP5-CT-TOPO based expression construct exhibited robust flux to **1**. Accordingly, pEXP5/SICPT2 constructs were used throughout these studies. For co-expression with SICPT2, SITPS21 was sub-cloned into pACYC-Duet/DEST, creating pACYC-Duet/DEST::SITPS21. To enable co-expression of CYP71D51 with SICPT2 and SITPS21, NdeI and KpnI restriction sites were introduced following the truncated SICPT2 open reading frame by PCR amplification, and this extended gene fragment was re-cloned into pEXP5-CT-TOPO.

The synthetic CYP71D51 gene was extended by PCR amplification to introduce a preceding NdeI restriction site and optimally spaced ribosome binding site, a KpnI restriction site following the open reading frame, and this cloned into pZeroBlunt. Both constructs were verified by complete sequencing of these extended gene fragments, then the CYP71D51 extended gene cloned into the extended pEXP5/SICPT2 construct using the NdeI/KpnI restriction sites, creating a bicistronic pEXP5/SICPT2-CYP71D51 dual expression vector. A non-extended version of CYP71D51 was sub-cloned into pET-Duet/DEST, creating pET-Duet/DEST::CYP71D51 expression vector for the production of CYP71D51 alone – i.e., for in vitro assays.

**Metabolic engineering.** All metabolic engineering was carried out using the C41 OverExpress strain of *E. coli* (Lucigen). For production of the dephosphorylated derivative of **1**, (*Z,Z,Z*)-nerylnerol (NNOH), pEXP5/SICPT2 was co-transformed with pIRS, which overexpresses key enzymes from the endogenous isoprenoid precursor supply pathway, leading to increased flux to terpenoids.<sup>1</sup> For comparative purposes, a strain for production of the dephosphorylated derivative of (*E,E,E*)-geranylgeranyl diphosphate (GGPP), (*E,E,E*)-geranylgeraniol (GGOH), was constructed by co-transformation of pIRS with pGG, which expresses a plant GGPP synthase.<sup>2</sup> For the production of **2**, pEXP5/SICPT2 was co-transformed with not only pIRS, but also pACYC-Duet/DEST::SITPW21. GC-MS analysis demonstrated that the resulting olefin exhibited identical retention time and mass spectra to the previously reported product from in vitro reactions with recombinant SICPT2 and SITPS21,<sup>3</sup> indicating the expected equivalence. Finally, for the production of **3** and **4**, pEXP5/SICPS2-CYP71D51 was co-transformed with pACYC-Duet/DEST::SITPW21 and pCDF-Duet/DEST::AtCPR1, which expresses a CYP reductase from *Arabidopsis thaliana*.<sup>4</sup> These recombinant strains were grown at 37 °C in TB (terrific broth) with the appropriate antibiotics to an OD<sub>600</sub> of 0.4–0.6, when the temperature was lowered to 16 °C, and after one hr of equilibration the cultures induced with 1 mM IPTG (isopropyl β-D-thiogalacto-pyranoside), then fermented for an additional 72 hrs at 16 °C.

**Compound isolation.** Following fermentation, the diterpenes were extracted with an equal volume of hexanes, which was dried under vacuum, and the residue was redissolved in 10 mL hexanes and subjected to flash chromatography over a 4-g. silica column. After loading, the column was washed with 24 mL hexanes and eluted with 48 mL of 9:1 hexanes-acetone (v/v) then 48 mL of 8:2 hexanes-acetone. The diterpene containing fractions, as ascertained by GC-MS analysis, were further subjected to HPLC separation carried out with a Supelcosil LC-18 column (4.6 x 250 mm, 5 mm) using a 0.5 mL/min flow rate. For isolation of NNOH, GGOH and **2**, after loading the column was washed with 50% acetonitrile/water (0 to 5 min) and eluted with 100% acetonitrile (5 to 30 min). For isolation of **3** and **4**, after loading the column was sequentially eluted with 82% acetonitrile/water (0 to 10 min), 87% acetonitrile (10 to 20 min) and 93% acetonitrile (20 to 30 min). For each compound the fractions containing the relevant diterpene, as determined by GC-MS analysis, were pooled, dried under a gentle stream of N<sub>2</sub>, and resuspended in deuterated chloroform, with this evaporation-resuspension process repeated twice to completely remove protonated solvent. Initial analysis of **2** demonstrated that it was unstable in CDCl<sub>3</sub>, necessitating the use of deuterated pyridine as the solvent. NMR data is presented below. The measured optical rotation values are **2**:  $[\alpha]_D^{23} +7.9$  (*c* 0.1, CHCl<sub>3</sub>) and **4**:  $[\alpha]_D^{23} +13.8$  (*c* 0.2, CHCl<sub>3</sub>).

**Analysis of CYP71D51.** For in vitro assays, CYP71D51 was co-expressed with AtCPR1 in the C43 OverExpress strain of *E. coli* (Lucigen) using pET-Duet/DEST::CYP71D51 and pCDF-Duet/DEST::AtCPR1. This recombinant strain was grown, spheroblasts or microsomes prepared,

and reactions carried out, as previously described.<sup>5</sup> Briefly, the cultures were grown as above, with the cells collected by centrifugation (10 min. at 5,000 x g) and resuspended in lysis buffer (10 mM Tris-HCl, pH 7.2, 0.5 mM EDTA, 1 mM DTT, 20% glycerol). Lysis was carried by initial lysosome treatment (0.1 mg/mL for 10 min.), followed by brief, mild sonication (3 x 3 sec. bursts at 30% output). Spheroblasts were prepared by centrifugation (10 min. at 10,000 x g) to remove cellular debris. Microsomes were prepared by ultracentrifugation (30 min. at 76,000 x g), with resuspension of the ensuing pellet in lysis buffer. All preparative steps were carried out at 4 °C. Reactions were carried out using 400 µL of assay buffer (100 mM Tris/HCl, pH 7.8, 0.5 mM EDTA, 20% glycerol) and 100 µL of cell-free extract or microsomal preparations, which were initiated by the addition of 80 µM substrate (**2** or **3**). After 3 hrs, the resulting solutions were extracted twice with 1 mL hexanes and the extracts dried under N<sub>2</sub>, with the residue resuspended in 150 µL hexanes for GC analysis. Given that α-hydroxy ketones are of some interest based on the presence of such a moiety in a number of natural products of pharmaceutical interest,<sup>6-12</sup> and that the production of an α-hydroxy ketone from an olefin, as shown to be catalyzed by CYP71D51 here, has drawn some interest from synthetic chemists as well,<sup>13-19</sup> we carried out further investigation of the catalyzed transformations. For <sup>18</sup>O<sub>2</sub> labeling, assay buffer was bubbled with nitrogen for 10 min. and reactions carried out in 1 mL reaction vials (Thermo Scientific™ Reacti-Vial™) with laminated discs and open-top screw caps, which were evacuated, flushed with nitrogen and re-evacuated. After the addition of 400 µL degassed assay buffer and 100 µL fresh microsomes each vial was re-evacuated and pressurized by saturation with <sup>18</sup>O<sub>2</sub>. Reactions were then initiated by the addition of substrate and 0.4 mM NADPH via syringe. To verify assignment of the keto group in **4**, the ability of this oxygen to undergo exchange with water via a geminal dihydroxy form was investigated. Given the stability of keto groups in neutral aqueous solutions,<sup>20</sup> this was carried out by incubation of ~10 µg of **4** in 50 µL of <sup>18</sup>O-labeled water (97%; Cambridge Isotope Laboratories) acidified with 10 mM HCl at room temperature (~22 °C). Equivalent incubations were extracted after 4, 17 and 22 hours, twice with 100 µL hexanes, which were combined, dried under N<sub>2</sub>, resuspended in 100 µL hexanes, and 5 µL injected for GC-MS analysis. Comparison of the resulting mass spectra to that from a control incubation in unlabeled water (also with 10 mM HCl) revealed the incorporation of a single atom of <sup>18</sup>O, present in increasing amounts with increased incubation time, reaching >25% of **4** after 22 hours (Figure S34), consistent with the presence of a keto group.

**QCC analysis.** Calculations were performed with GAUSSIAN09.<sup>21</sup> Geometries were optimized using the B3LYP method with the basis set of 6-31+G(d,p) in the absence and 6-31G(d) in the presence of PPI.<sup>22</sup> All stationary points were characterized as minima or transition state structures using frequency calculations at the same level. All reported energies include zero-point energy corrections (unscaled) from the frequency calculations at the same level. Intrinsic reaction coordinate (IRC) calculations were used for further characterization of transition state structures.<sup>23</sup> mPW1PW91<sup>24</sup> and MPWB1K<sup>25</sup> energies are also shown, since it is known that B3LYP underestimates the relative energies of cyclic structures versus acyclic isomers.<sup>24</sup> These energies include zero-point energy corrections (unscaled) from the frequency calculations using the B3LYP method at the same level. The validity of this computational approach for examining terpene-forming carbocation rearrangements is well-established.<sup>26</sup> Structural images were created with *Ball&Stick*.<sup>27</sup>

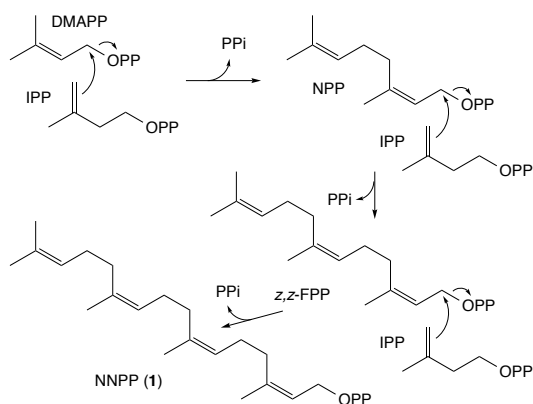

Scheme S1. Reactions catalyzed by SICPT2. Condensation of dimethylallyl diphosphate (DMAPP) with isopentenyl diphosphate (IPP) to NPP, which is condensed with another molecule of IPP to *z,z*-FPP, which further is condensed with yet another molecule of IPP to yield the final product NNPP (**1**), with loss of pyrophosphate at each step.

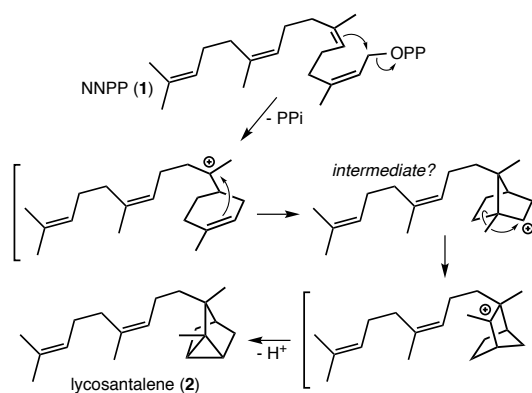

Scheme S2. Reaction catalyzed by SITPS21 with **1**.

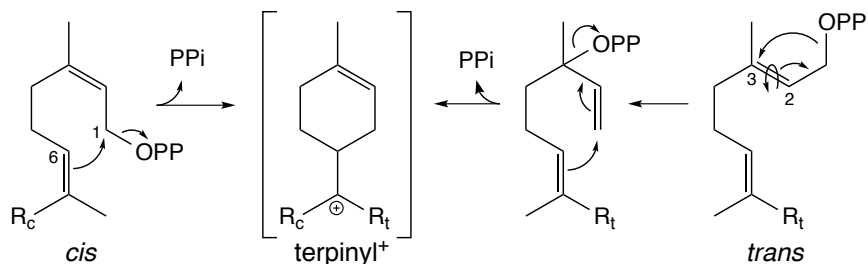

Scheme S3. C1-C6 cyclization requires isomerization of *transoid*, but not *cisoid*, prenyl diphosphate precursors.

### Detailed results and discussion of QCC analysis

Rearrangements of cation **B** ( $10e$  configuration) were examined using quantum chemical calculations. The computed carbocation intermediates and transition state structures and computed energies involved in the  $10e$ -**B** conversion are shown in Scheme S4 (in the absence of PPI) and Scheme S5 (in the presence of PPI).

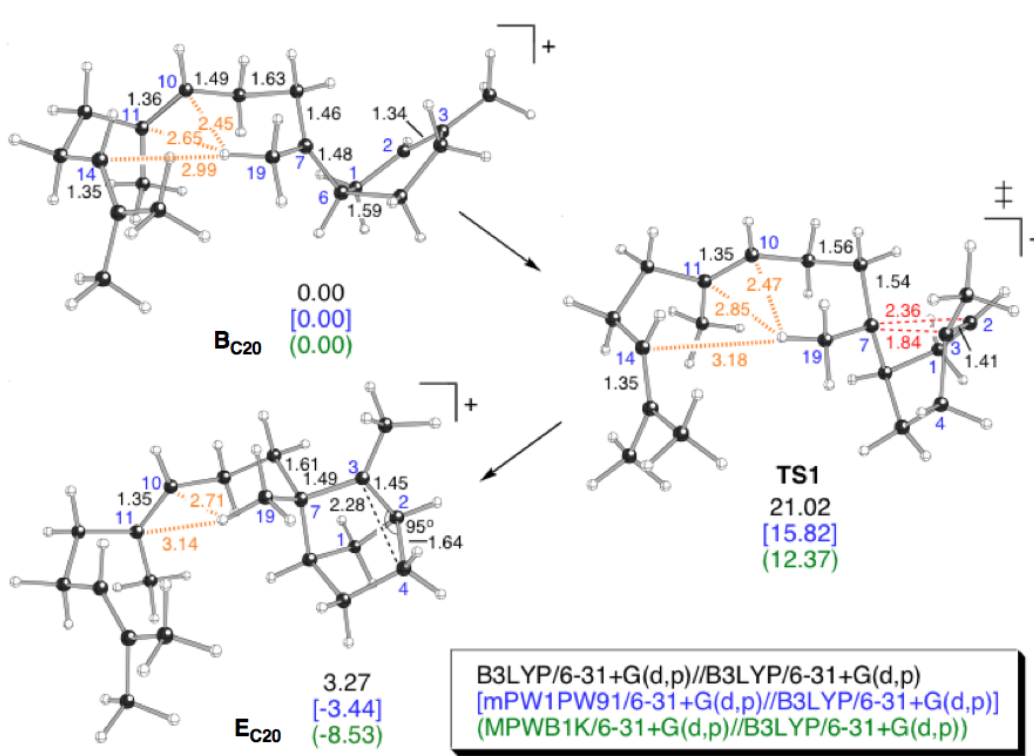

Scheme S4. Computed geometries (distances in Å) and energies (kcal/mol; all energies include zero-point energy corrections from the B3LYP frequency calculations) involved in the **B**→**E** conversion in the absence of PPI.

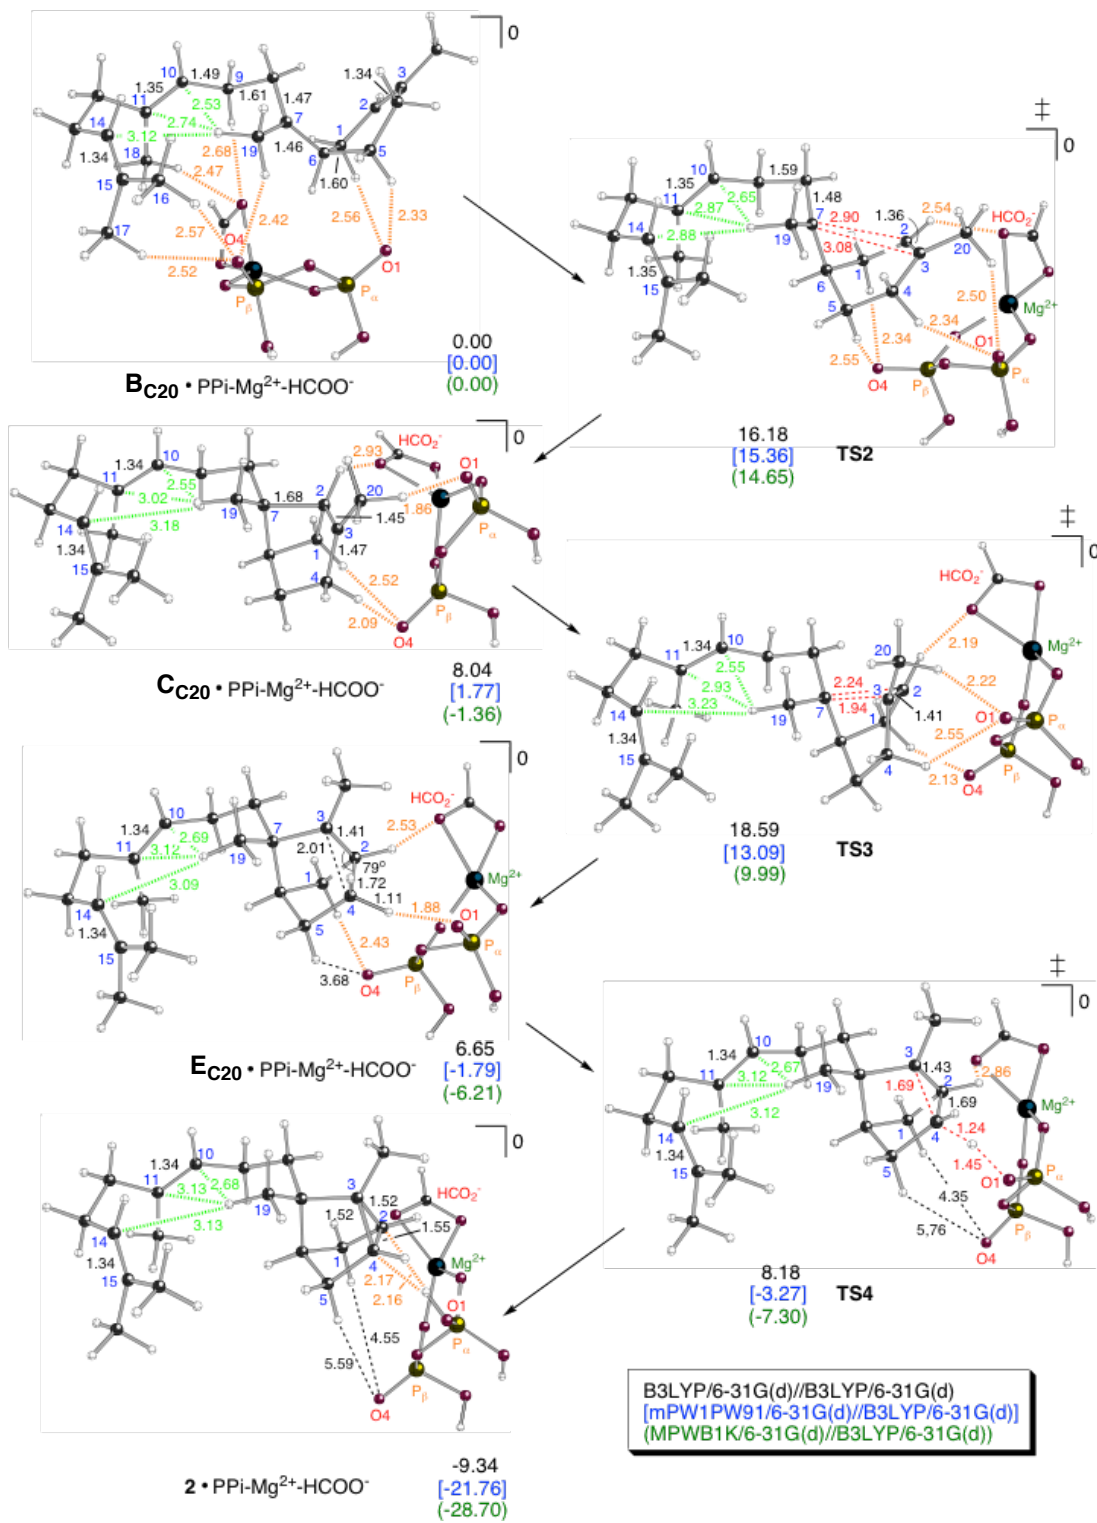

Scheme S5. **B**→**E** conversion in the presence of PPI. Computed complexes (selected distances in Å) and energies (kcal/mol; all energies include zero-point energy corrections from the B3LYP frequency calculations).

Based on our results, at least 12 kcal/mol barrier from the MPWB1K method is predicted for the **B**→**C** reaction (overall highest barrier) in the absence of PPi. Slightly higher barrier (approximately 15 kcal/mol from the MPWB1K method) is predicted for the reaction in the presence of PPi than in the absence of PPi. Variations in individual interactions between carbocations and PPi are also observed upon cationic center shifts one atom to another. It is notable that substantial PPi shift toward cationic center **C7** is observed in the **B**-PPi complex compared to other complexes. This shift is believed in large to be owed to simple attraction of anionic PPi to cations due to lack of physical restriction in the absence of large part of the enzyme. Thus, the actual barrier for the **B**→**C** reaction could be less when physical constrain of PPi in the active site restricts migration of PPi. Note also that harnessing interactions between carbocation intermediates and PPi persist in large *in gas phase* throughout rearrangements of cation **B**. The complex of cation **E** and PPi is favorable for direct proton transfer (Scheme S5; **E**→**2** is predicted a barrierless process) enabling the ultimate cyclopropane product to form.

*Coordinates and Energies*, as well as *IRC Plots*, can be found at the end of this document.

Figure S1. The structures and numbering of NNOH and compounds **2-4**

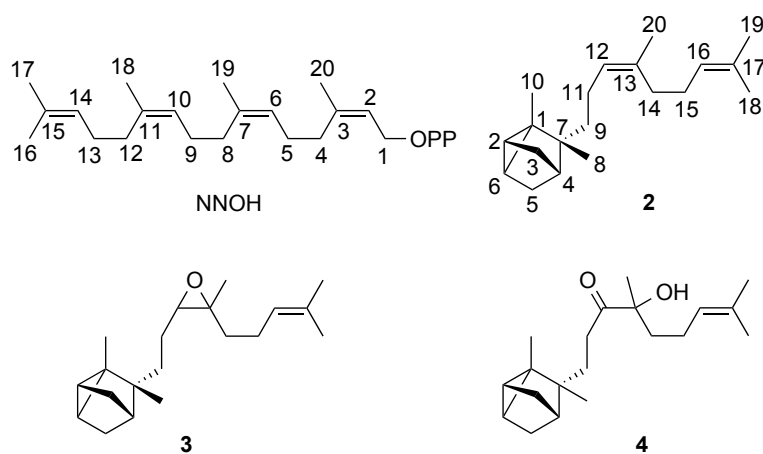

Figure S2. Selective NOESY correlations for NNOH and <sup>1</sup>H-<sup>1</sup>H COSY and HMBC correlations for **2-4**

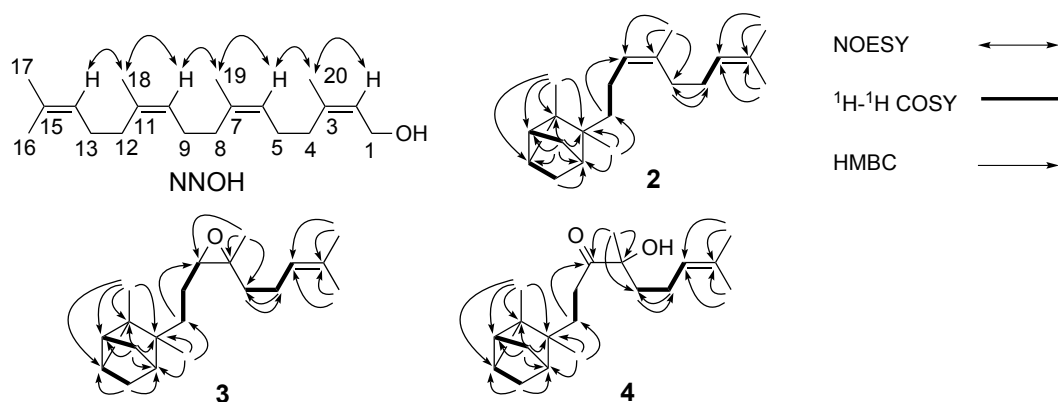



Table S1. NMR data for NNOH and GGOH (CDCl<sub>3</sub>, 700 MHz)

| Position | NNOH                       |                     | GGOH                       |                     |
|----------|----------------------------|---------------------|----------------------------|---------------------|
|          | $\delta_{\text{H}}$        | $\delta_{\text{C}}$ | $\delta_{\text{H}}$        | $\delta_{\text{C}}$ |
| 1        | 4.09 (2H, m)               | 59.6                | 4.15 (2H, d, $J = 6.7$ Hz) | 60.0                |
| 2        | 5.44 (1H, t, $J = 7.1$ Hz) | 124.9               | 5.42 (1H, t, $J = 6.7$ Hz) | 123.9               |
| 3        |                            | 140.5               |                            | 140.5               |
| 4        | 2.10 (2H, m)               | 32.8                | 2.04 (2H, m)               | 40.2                |
| 5        | 2.09 (2H, m)               | 26.9                | 2.12 (2H, m)               | 26.9                |
| 6        | 5.13 (1H, m)               | 125.4               | 5.10 (1H, m)               | 125.0               |
| 7        |                            | 136.7               |                            | 136.0               |
| 8        | 2.04 (2H, m)               | 32.8                | 1.98 (2H, m)               | 40.31               |
| 9        | 2.05 (2H, m)               | 27.3                | 2.07 (2H, m)               | 27.2                |
| 10       | 5.12 (1H, m)               | 125.1               | 5.12 (1H, m)               | 124.4               |
| 11       |                            | 136.0               |                            | 135.6               |
| 12       | 2.04 (2H, m)               | 32.5                | 1.98 (2H, m)               | 40.28               |
| 13       | 2.05 (2H, m)               | 27.0                | 2.06 (2H, m)               | 27.4                |
| 14       | 5.11 (1H, m)               | 125.0               | 5.09 (1H, m)               | 124.8               |
| 15       |                            | 132.1               |                            | 131.9               |
| 16       | 1.61 (3H, s)               | 18.2                | 1.68 (3H, s)               | 26.3                |
| 17       | 1.68 (3H, s)               | 26.3                | 1.60 (3H, s)               | 18.3                |
| 18       | 1.69 (3H, s)               | 23.99               | 1.60 (3H, s)               | 16.61               |
| 19       | 1.69 (3H, s)               | 23.96               | 1.60 (3H, s)               | 16.60               |
| 20       | 1.75 (3H, s)               | 24.04               | 1.68 (3H, s)               | 16.9                |

Table S2. NMR data of **2** (pyridine-d<sub>5</sub>, 700 MHz)

| Position | $\delta_{\text{H}}$               | $\delta_{\text{C}}$ |
|----------|-----------------------------------|---------------------|
| 1        |                                   | 28.0                |
| 2        | 0.72 (1H, m)                      | 20.20               |
| 3 a      | 1.50 (1H, m)                      | 31.6                |
| b        | 0.91 (1H, d, $J = 10.7$ Hz)       |                     |
| 4        | 1.45 (1H, m)                      | 38.8                |
| 5 a      | 1.47 (1H, m)                      | 32.1                |
| b        | 0.93 (1H, d, $J = 10.7$ Hz)       |                     |
| 6        | 0.73 (1H, m)                      | 20.18               |
| 7        |                                   | 46.5                |
| 8        | 0.70 (3H, s)                      | 17.9                |
| 9 a      | 1.15 (1H, dt, $J = 5.5, 12.5$ Hz) | 35.5                |
| b        | 1.06 (1H, dt, $J = 5.5, 12.5$ Hz) |                     |
| 10       | 0.88 (3H, s)                      | 11.1                |
| 11       | 1.87 (2H, m)                      | 23.78               |
| 12       | 5.10 (1H, m)                      | 127.0               |
| 13       |                                   | 134.8               |
| 14       | 2.02 (2H, m)                      | 32.4                |
| 15       | 2.03 (2H, m)                      | 27.3                |
| 16       | 5.11 (1H, m)                      | 125.2               |
| 17       |                                   | 131.8               |
| 18       | 1.49 (3H, s)                      | 18.0                |
| 19       | 1.56 (3H, s)                      | 26.2                |
| 20       | 1.62 (3H, s)                      | 23.84               |

Table S3. NMR data of **3** (CDCl<sub>3</sub>, 700 MHz)

| Position | $\delta_{\text{H}}$         | $\delta_{\text{C}}$ |
|----------|-----------------------------|---------------------|
| 1        |                             | 28.0                |
| 2        | 0.77 (1H, m)                | 20.2                |
| 3 a      | 1.45 (1H, m)                | 31.6                |
| b        | 0.95 (1H, d, $J = 10.4$ Hz) |                     |
| 4        | 1.44 (1H, m)                | 38.8                |
| 5 a      | 1.52 (1H, d, $J = 10.2$ Hz) | 32.1                |
| b        | 0.98 (1H, d, $J = 9.6$ Hz)  |                     |
| 6        | 0.77 (1H, m)                | 20.1                |
| 7        |                             | 46.3                |
| 8        | 0.74 (3H, s)                | 18.0                |
| 9        | 1.22 (2H, m)                | 31.4                |
| 10       | 0.93 (1H, s)                | 11.2                |
| 11       | 1.39 (m)                    | 24.5                |
|          | 1.35 (m)                    |                     |
| 12       | 2.58 (1H, t, $J = 6.2$ Hz)  | 66.1                |
| 13       |                             | 61.6                |
| 14       | 1.49 (1H, m)                | 33.4                |
|          | 1.40 (1H, m)                |                     |
| 15       | 2.02 (2H, m)                | 24.7                |
| 16       | 5.03 (1H, t, $J = 6.6$ Hz)  | 124.4               |
| 17       |                             | 132.6               |
| 18       | 1.54 (3H, s)                | 18.2                |
| 19       | 1.61 (3H, s)                | 26.3                |
| 20       | 1.21 (3H, s)                | 22.9                |

Table S4. NMR data of **4** (CDCl<sub>3</sub>, 700 MHz)

| Position | $\delta_{\text{H}}$         | $\delta_{\text{C}}$ |
|----------|-----------------------------|---------------------|
| 1        |                             | 27.9                |
| 2        | 0.79 (1H, m)                | 20.2                |
| 3 a      | 1.45 (1H, m)                | 31.5                |
| b        | 0.98 (1H, d, $J = 10.7$ Hz) |                     |
| 4        | 1.42 (1H, m)                | 38.7                |
| 5 a      | 1.53 (1H, d, $J = 10.2$ Hz) | 32.1                |
| b        | 1.01 (1H, d, $J = 10.3$ Hz) |                     |
| 6        | 0.79 (1H, m)                | 20.0                |
| 7        |                             | 46.0                |
| 8        | 0.74 (3H, s)                | 17.9                |
| 9 a      | 1.46 (1H, m)                | 29.0                |
| b        | 1.36 (1H, m)                |                     |
| 10       | 0.94 (1H, s)                | 11.1                |
| 11       | 2.33 (2H, m)                | 31.9                |
| 12       |                             | 215.6               |
| 13       |                             | 79.3                |
| 14       | 1.66 (2H, m)                | 40.2                |
| 15 a     | 1.98 (1H, m)                | 22.9                |
| b        | 1.68 (1H, m)                |                     |
| 16       | 4.96 (1H, m)                | 124.0               |
| 17       |                             | 133.1               |
| 18       | 1.49 (3H, s)                | 18.2                |
| 19       | 1.58 (3H, s)                | 26.30               |
| 20       | 1.27 (3H, s)                | 26.33               |

### Synthetic gene sequence of CYP71D51

ATGGCAAAAAAACCCAGCAGCAAAGGTAACCTGCCCTCCGGGTCGGTGGAAACTGAGCATTATTGGTAATCTGCATCAGCTGGAAATTAGCCGTCGGT  
ATATTACCTGAAAGAACTGAGCAAAAAATACGGTCCGCTGATGCATCTGAAACTGGGTGAACGTAGCACCATTGTTATTAGCAGCTACAAAATTC  
GAAAGAACTGATGAAAACCCAGCAGTACCATTTCTGAGCCATCGTCCGGAACTGCTGGTTAGCGAAACCGTTGCATATAATGGTCGTGATATTGCATTT  
GCACCGTATGGCGATTATTGGAACAAAATGCGTAAAATCTGCACCAGCGAAATCTGAGCACCCTGCTATTCATAGCAATTTATCCTCTGATGGAAG  
AAGAAATAGTCGCCCTGGTGA AAAACATCAAAGAGAGCAGCAGTAAAGGCACCCCTGATTAATGTTTATGAATGCCTGAATAGCTGAGCTGTGCAAT  
TATTTGTCGTGTTACCGTTGGCACCACCTGTAATGATAGCGATAGCCTGATTAGTACCATCCGTA AAAATTACACCGCTGGTTGGTCTGTTTAAACATT  
AGCGACCTGTTTCCGAGCCTGAAATTTCTGGATCGTTATATTACCGGCAGCAATCAGAAACTGCTGAAAGTGCATCATGAACCTGTGTGATCGTCTGC  
TGGAAGAAATTTGTCATGAACATGAAGAAAGCATCCGCAAAAATAACGTGGATGAAGAGGACCTGCTGCATCTGCTGCTGCGTCTGCGTGAAAAAGA  
AAGCCATAATTTTCAGGTTCCGATCACCCGTGATAATGTGAAAGCAATTTATTTCTGGACATGTTTATTGGTGGCACCAGTACCACCAGTATTCTGGTT  
GAATGGCAATGGCAGAGCTGCTGAAAAATCGTAACATGATGAAAAAGCCAGGTGGAAGTTCTGAAAGTTCTGAAAGGTAAAAAAGTGGATC  
ACATCGACGTGCAGAATCTGAAATACCTGAAACTGATTGTGAAAGAAACCCCTGCGCCTGCATCCGCCCTGGTCCGCTGGCAATTCGCGTGAAAGCAT  
TGAAGAAATCGCAATTAATGGCTATGTGATCCCGAATAAAACCATTGCACTGATGAATCTGTATGCCATGGGTCTGATCCGGAATATTGGCATGAT  
CCTGAAAAATTCATGCCGGATCGCTTTAAACAATATGTGGATAACGATGTGAAATGATCAAAGGCAGCTCAAATGTGCCGATGGAATTTCTGGCAT  
TTGGTTTTGTAACGTGTTTTCGGGATGCTGTTTGCAACCGCAAGCAGCGAAGTACCCCTGGCACGCTGCTGTATCATTTTGTATTGGACCCCT  
GCCGAATGGTATGAATCCGAGGATCTGGATATGACCGAAGGTTTTGGTGCAGCAGCAACCATGAAAAATAACCTGTATCTGGTTGCCACCCCGTAT  
GATTAA

Figure S3. A

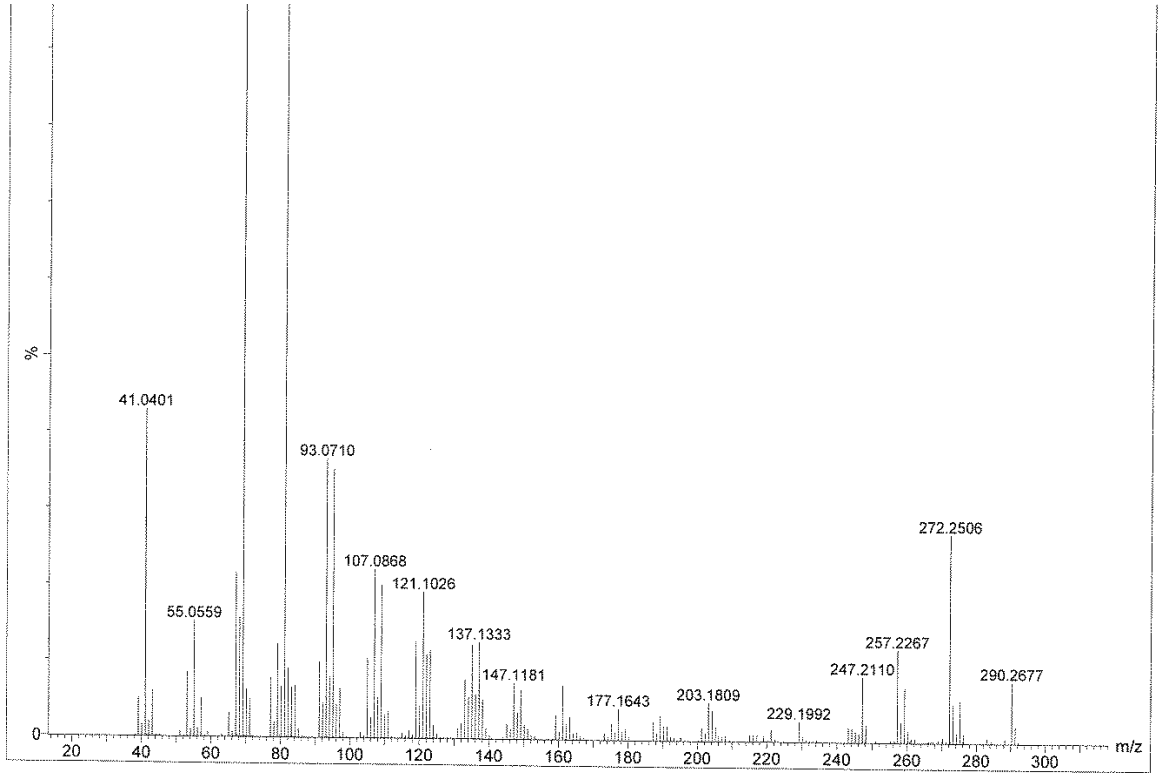

**Multiple Mass Analysis: 6 mass(es) processed**  
 Tolerance = 40.0 PPM / DBE: min = 0.0, max = 50.0  
 Isotope cluster parameters: Separation = 1.0 Abundance = 1.0%

Monoisotopic Mass, Odd and Even Electron Ions  
 72 formula(e) evaluated with 6 results within limits (all results (up to 1000) for each mass)

NNOH  
 jxz-04-29-05 1613 (16.443) Cm (1612:1613-1605:1609x1.050)

29-Apr-2014  
 TOF MS EI+  
 5.17e3

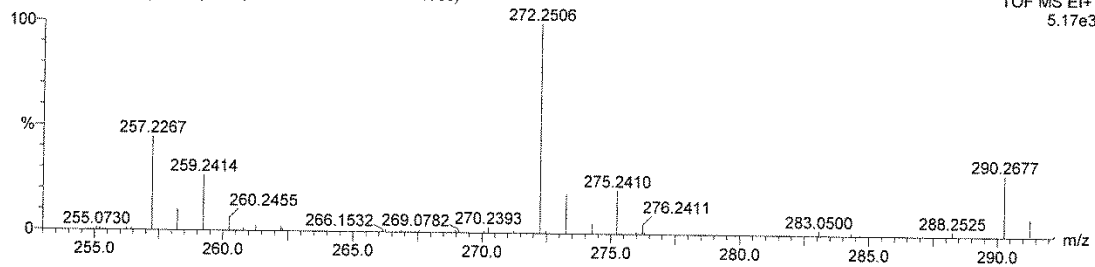

| Mass     | RA     | Calc. Mass | mDa  | PPM  | DBE | Score | Formula   |
|----------|--------|------------|------|------|-----|-------|-----------|
| 257.2267 | 44.42  | 257.2269   | -0.2 | -0.9 | 5.5 | 1     | C19 H29   |
| 259.2414 | 26.31  | 259.2426   | -1.2 | -4.5 | 4.5 | 1     | C19 H31   |
| 272.2506 | 100.00 | 272.2504   | 0.2  | 0.7  | 5.0 | 1     | C20 H32   |
| 273.2584 | 18.50  | 273.2582   | 0.2  | 0.6  | 4.5 | 1     | C20 H33   |
| 275.2410 | 20.56  | 275.2375   | 3.5  | 12.7 | 4.5 | 1     | C19 H31 O |
| 290.2677 | 29.19  | 290.2610   | 6.7  | 23.2 | 4.0 | 1     | C20 H34 O |

Figure S4.  $^1\text{H}$  NMR spectrum of NNOH.

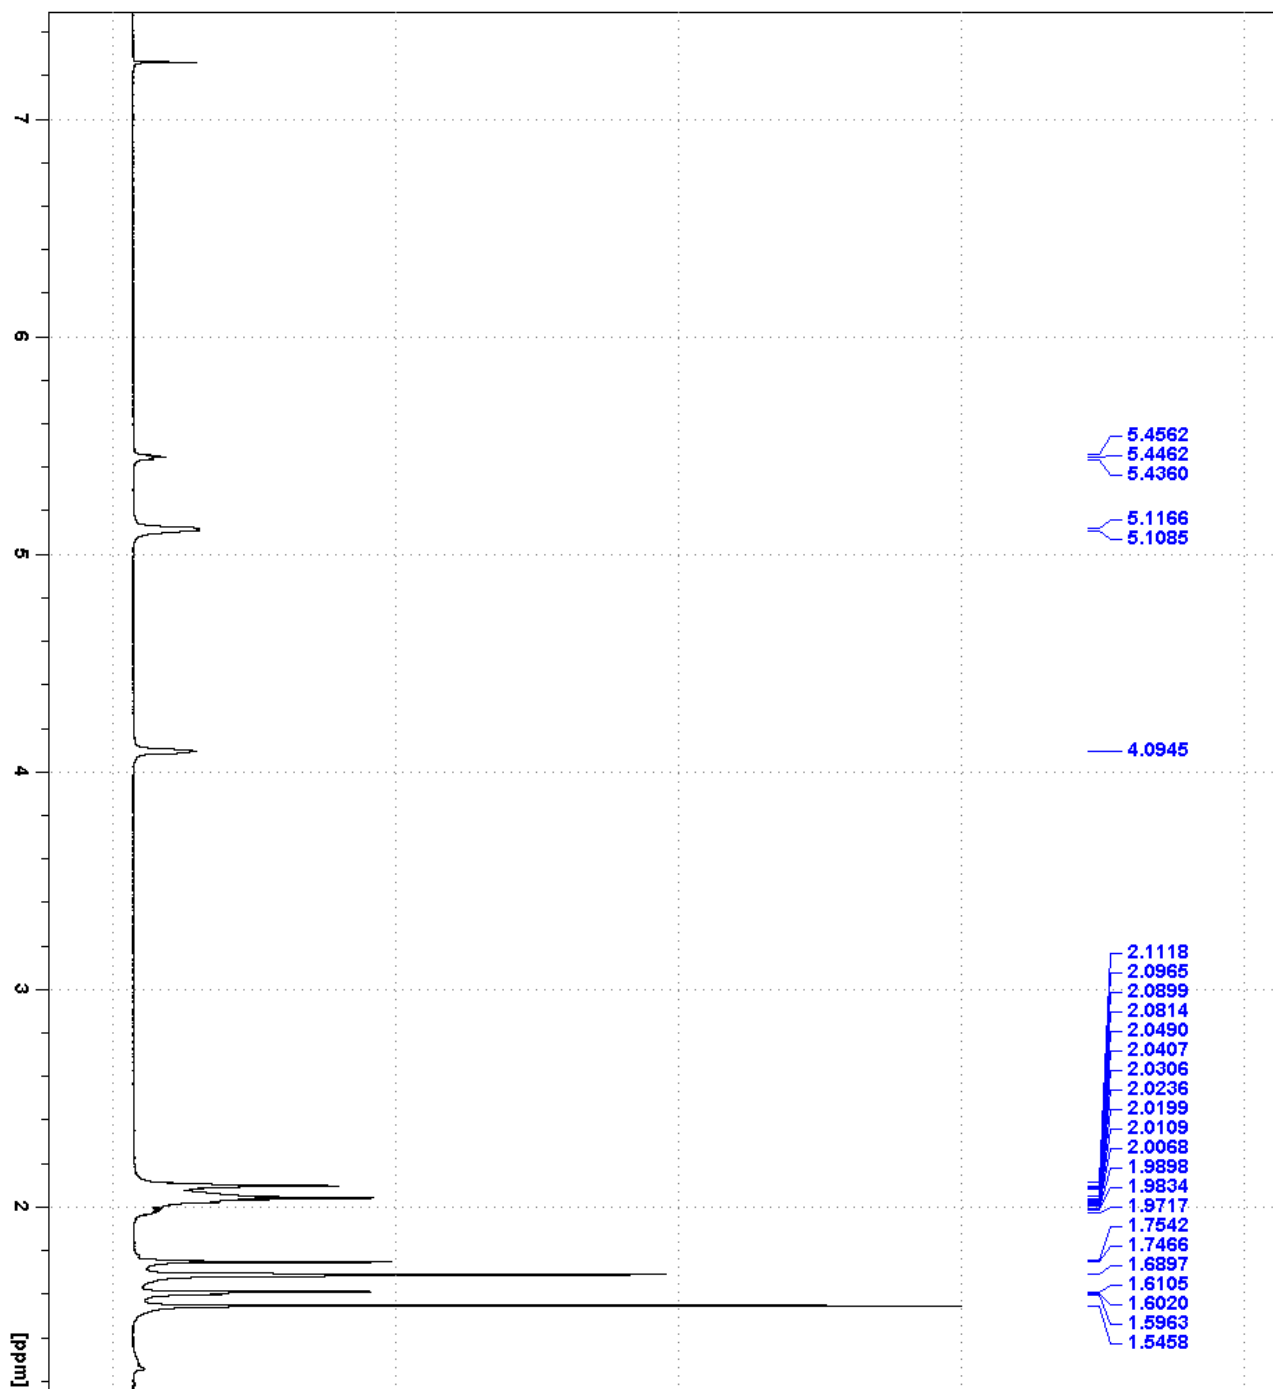

Figure S5.  $^{13}\text{C}$  NMR spectrum of NNOH.

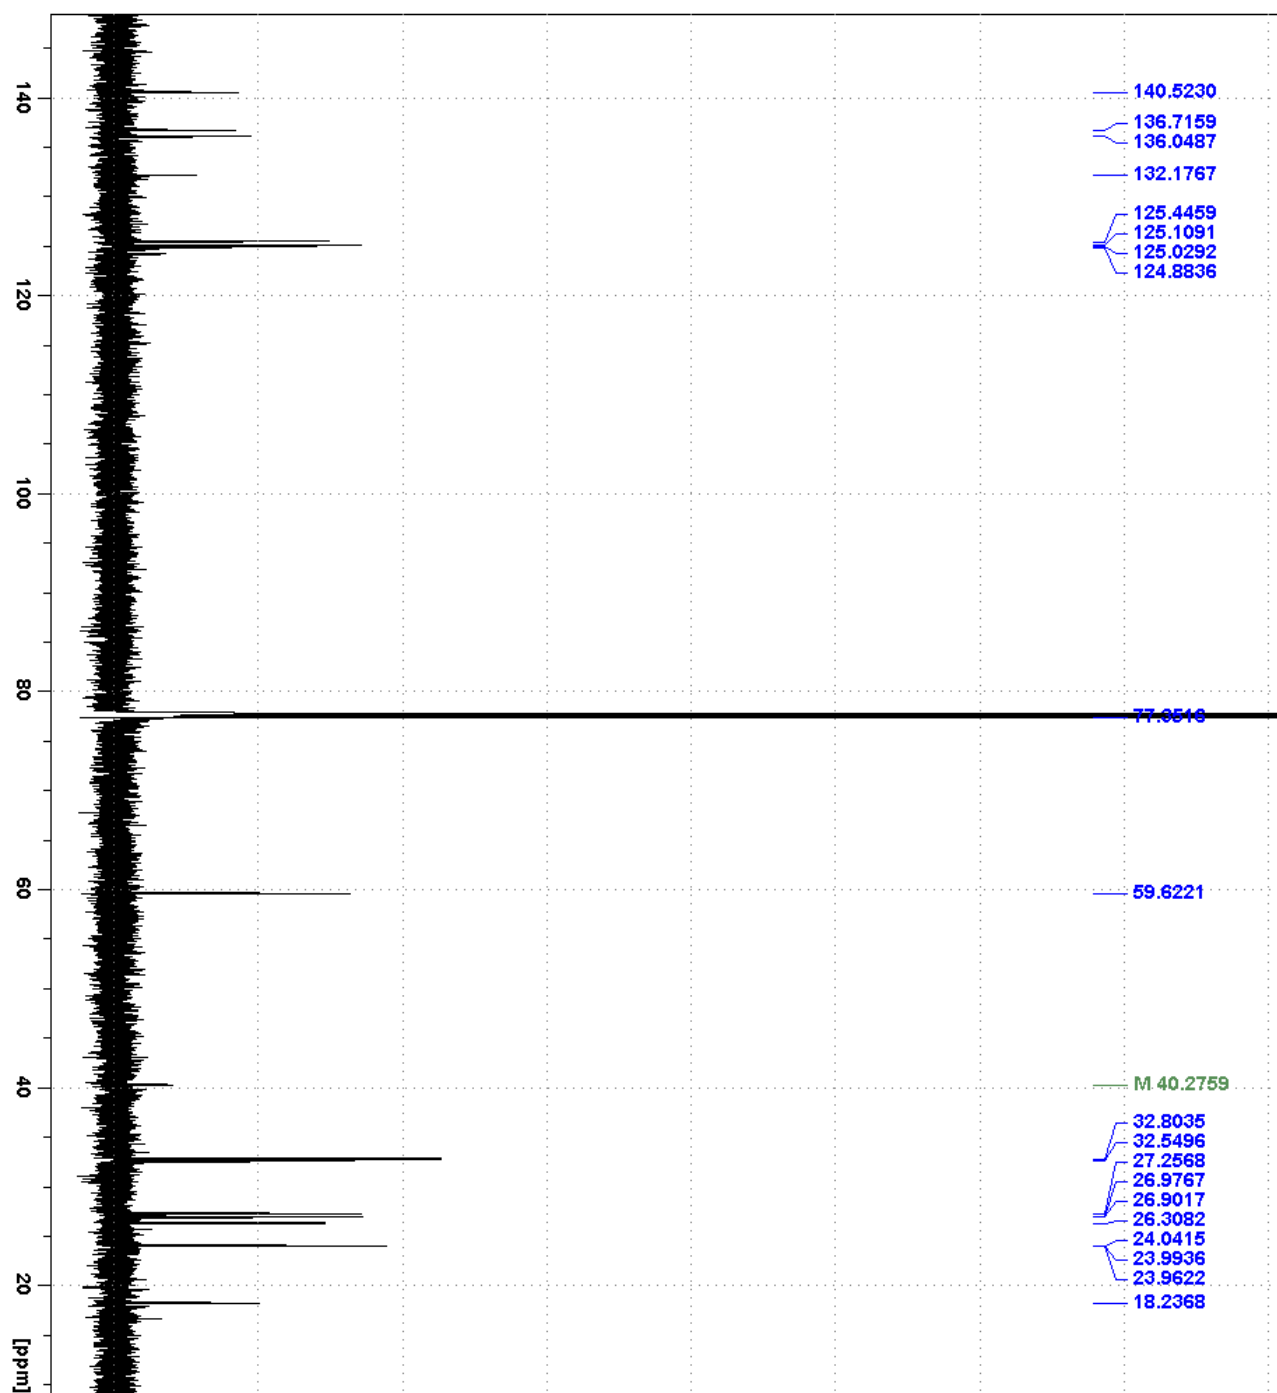

Figure S6. HSQC spectrum of NNOH.

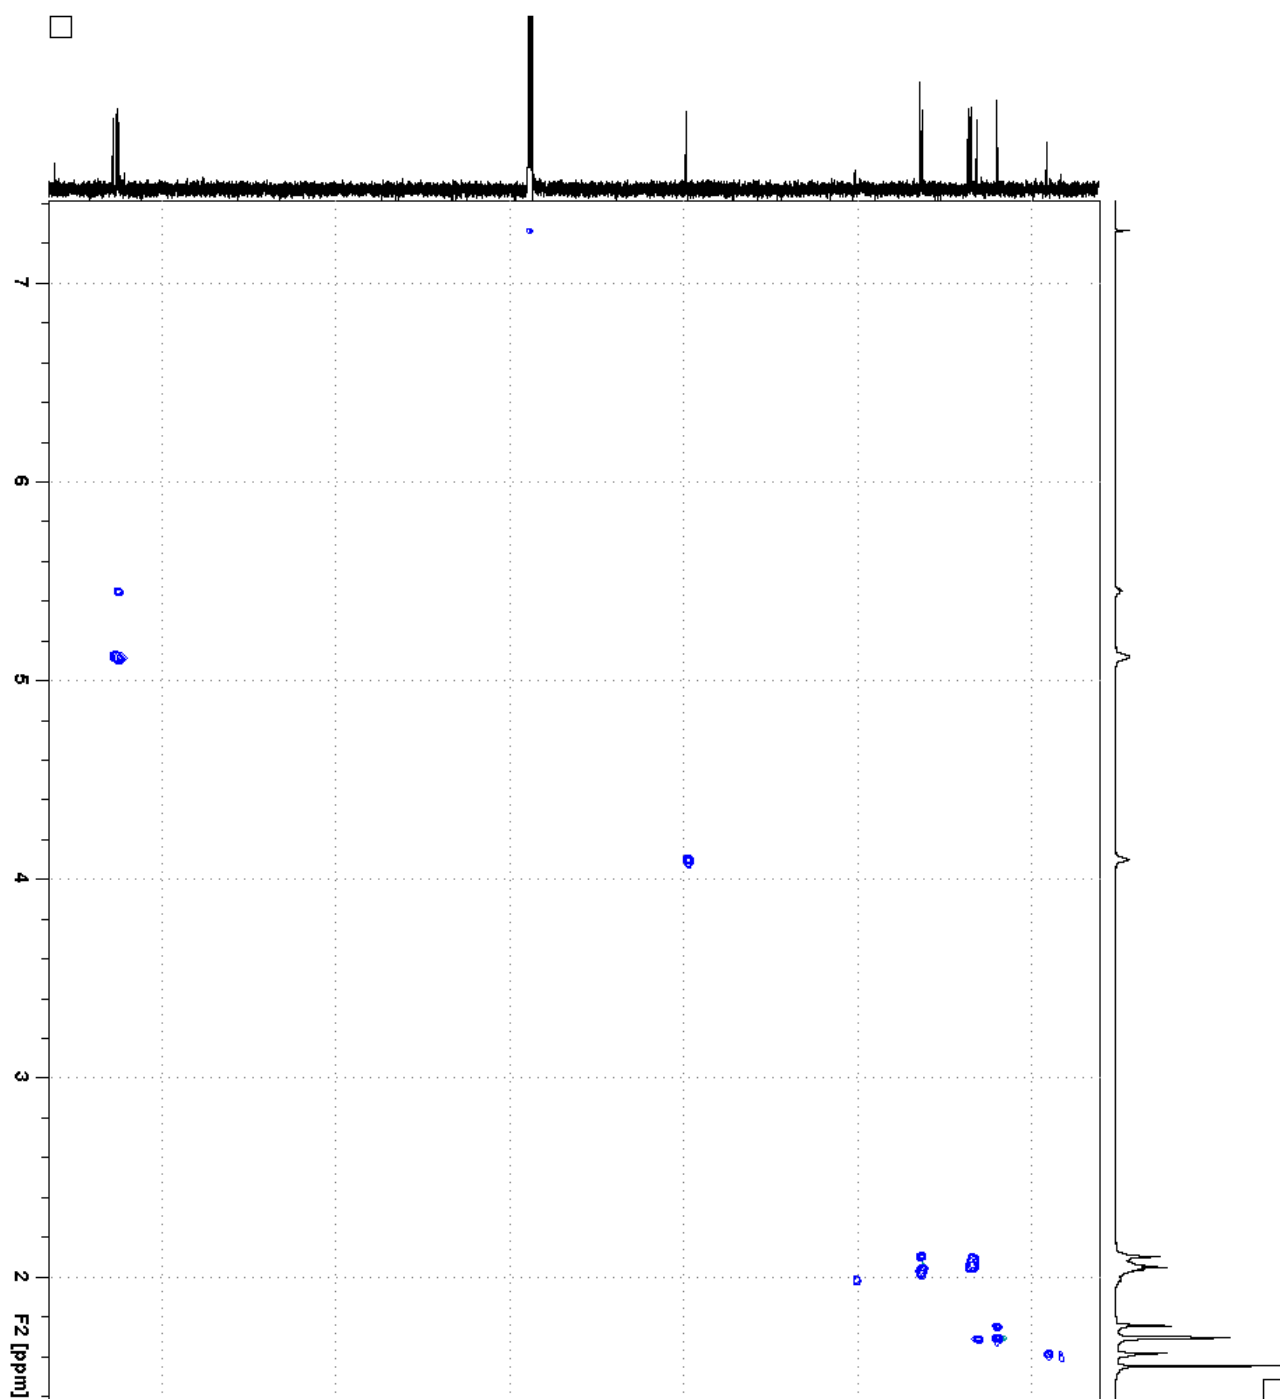

Figure S7. HMBC of NNOH.

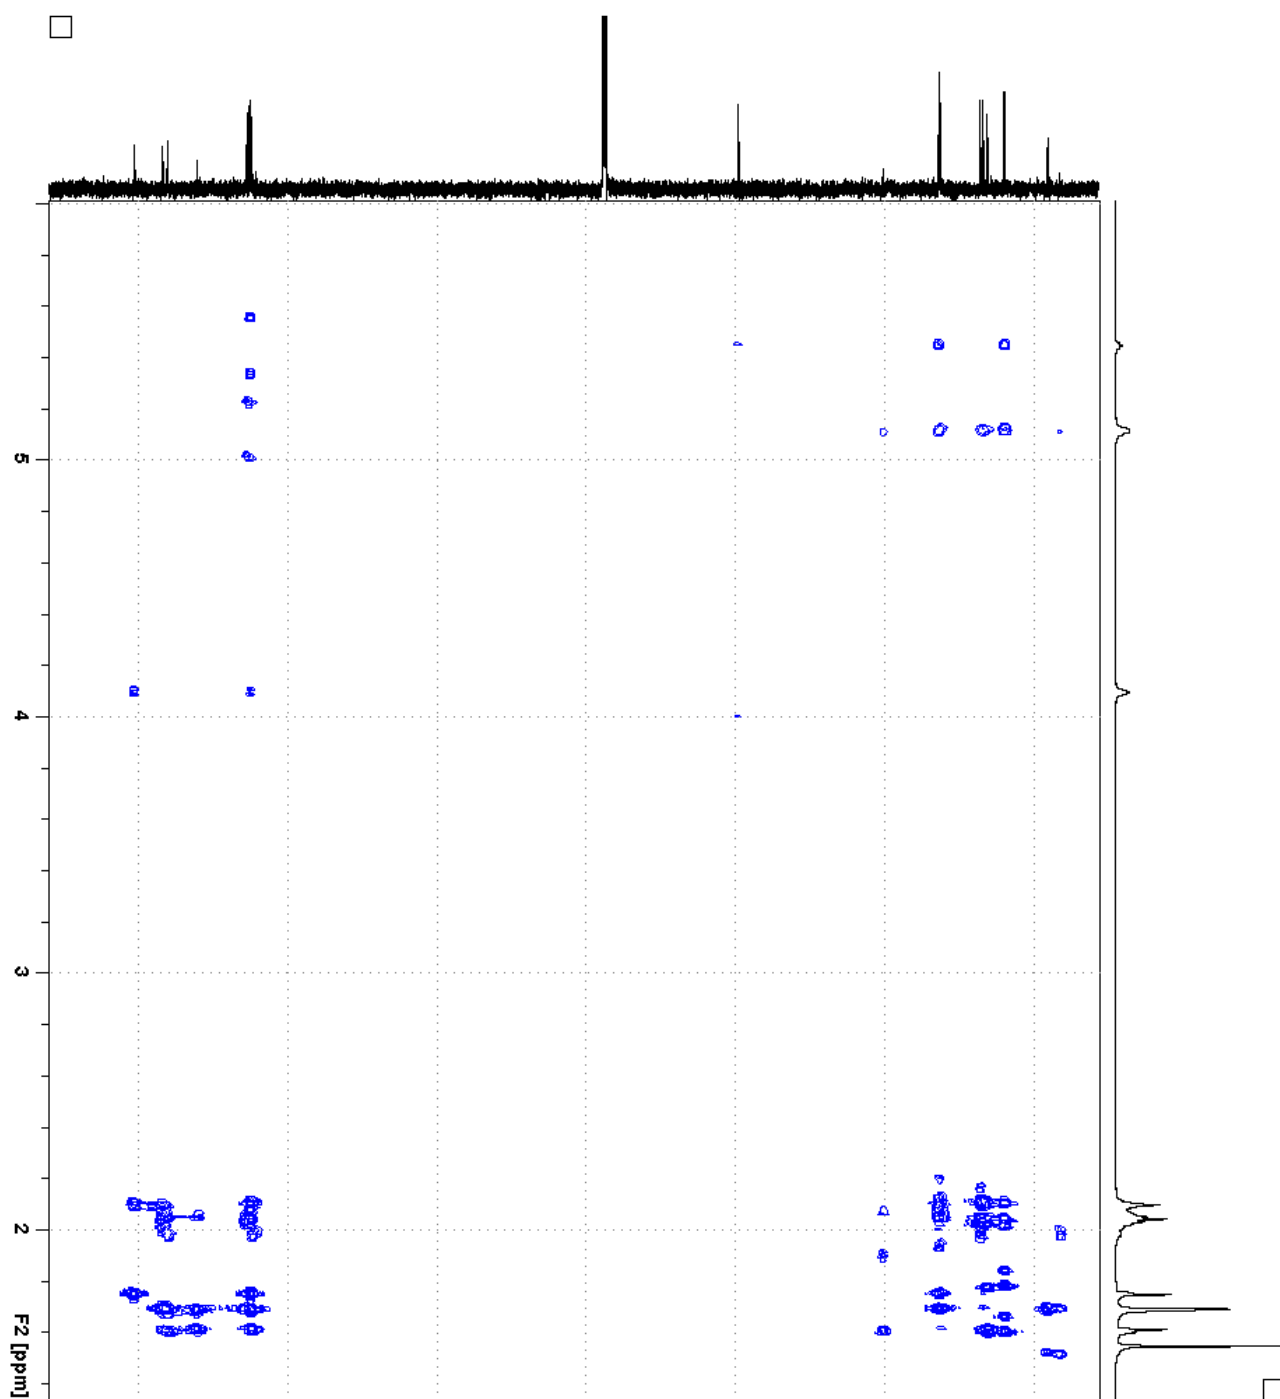

Figure S8. NOESY spectrum of NNOH.

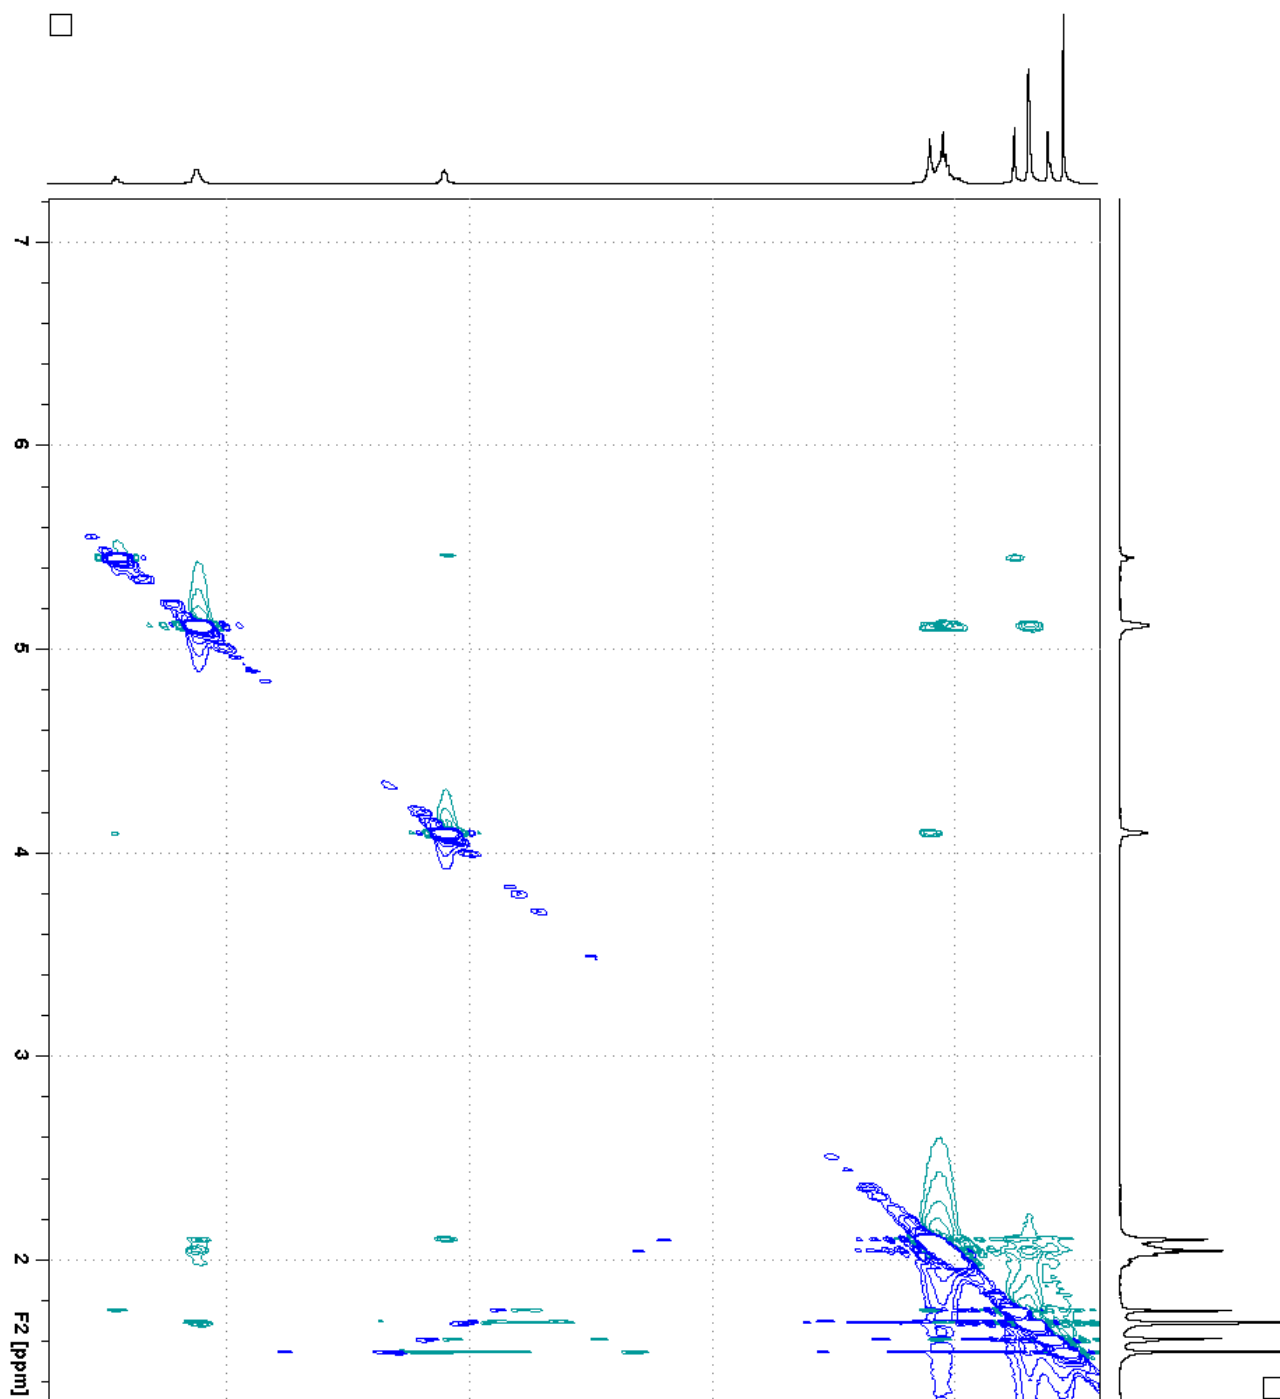



Figure S9.  $^1\text{H}$  NMR spectrum of GGOH.

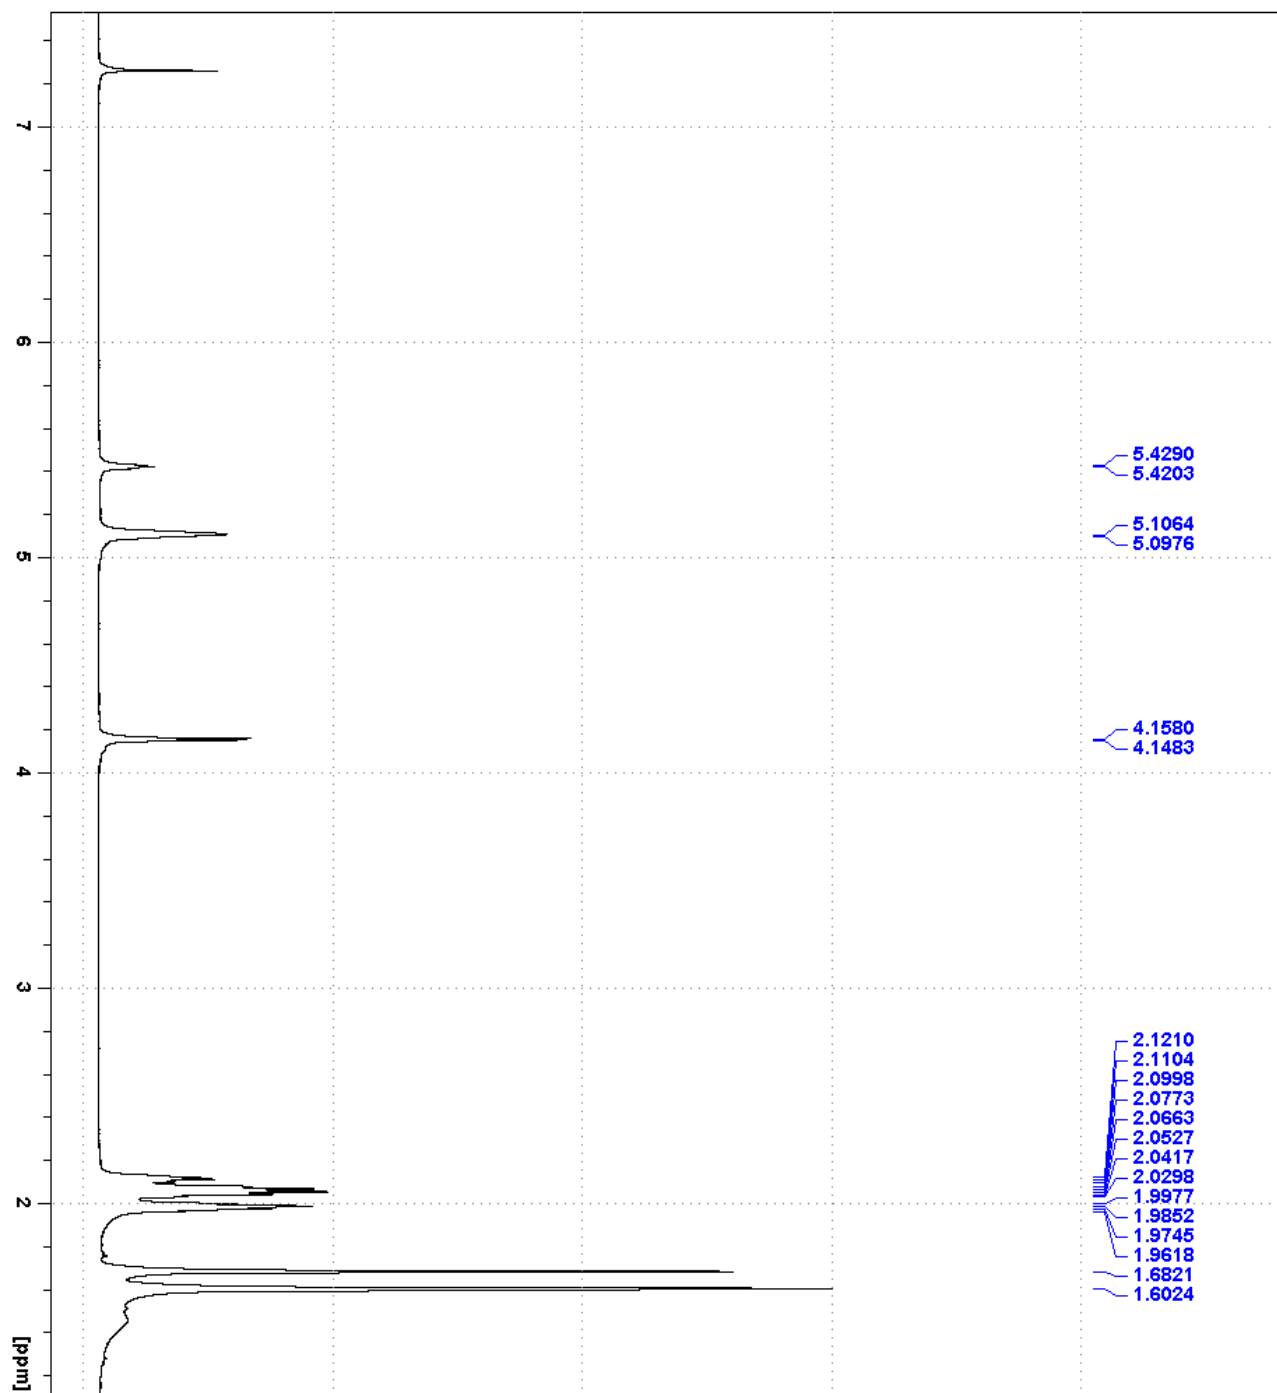

Figure S10.  $^{13}\text{C}$  NMR spectrum of GGOH.

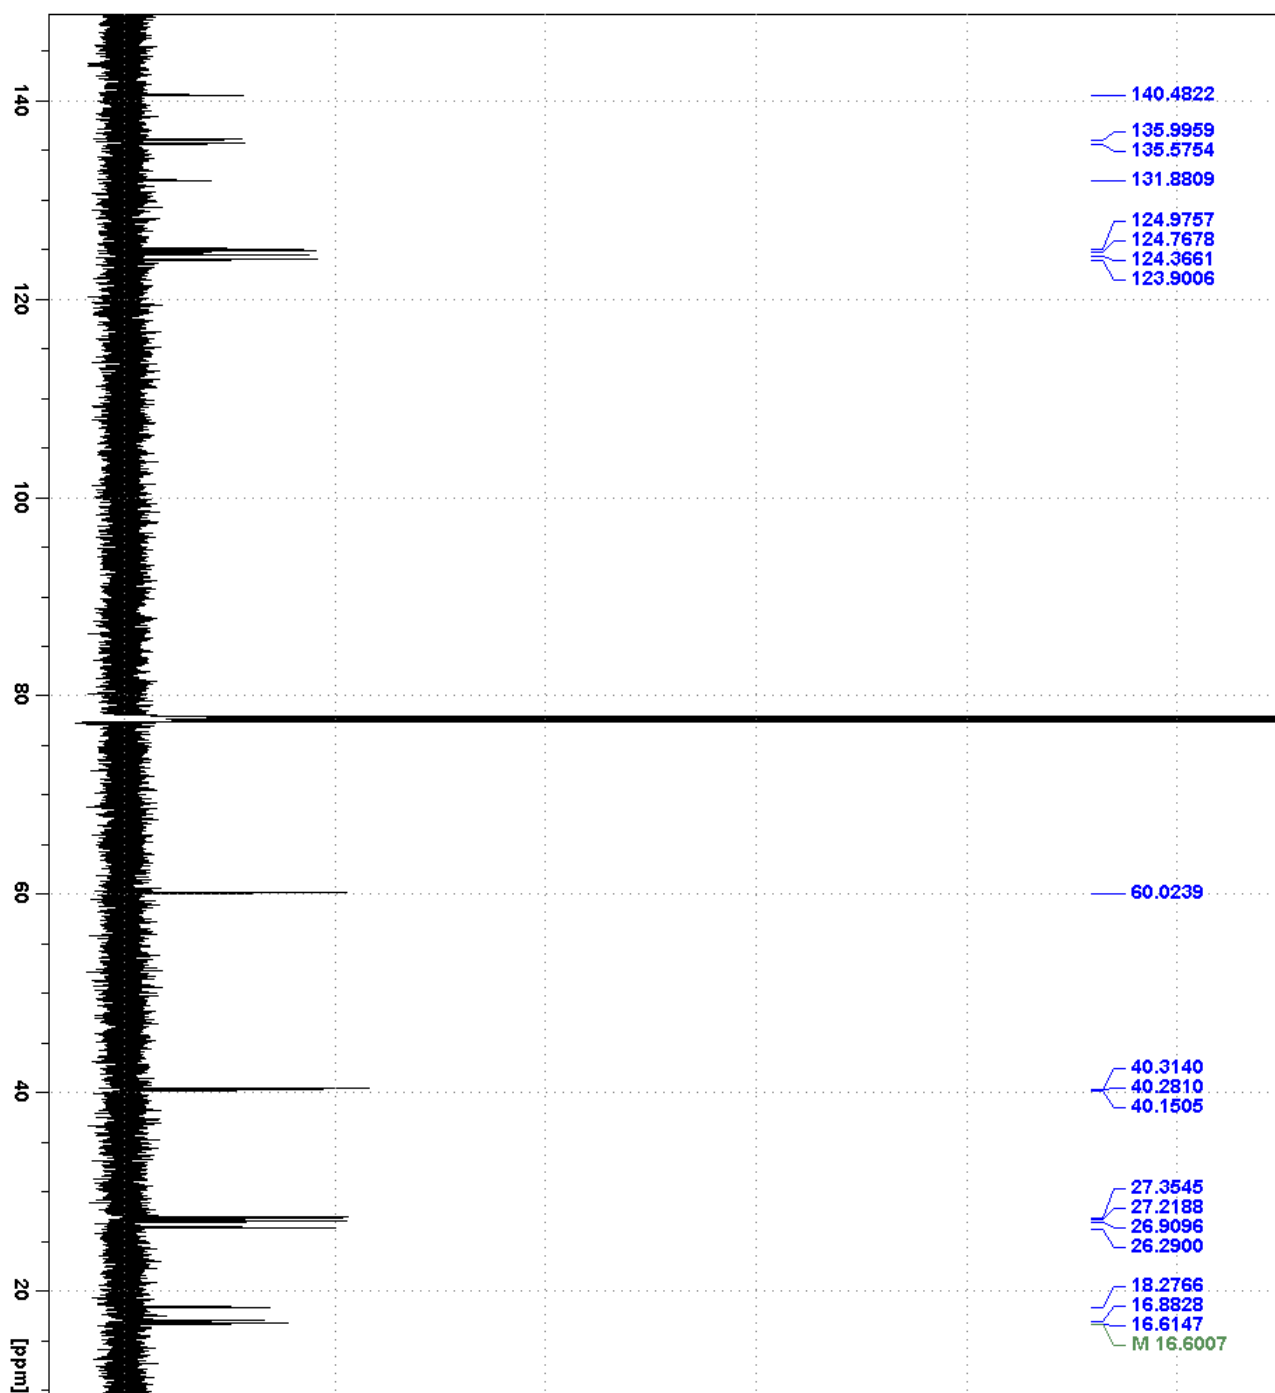

Figure S11. NOESY spectrum of GGOH.

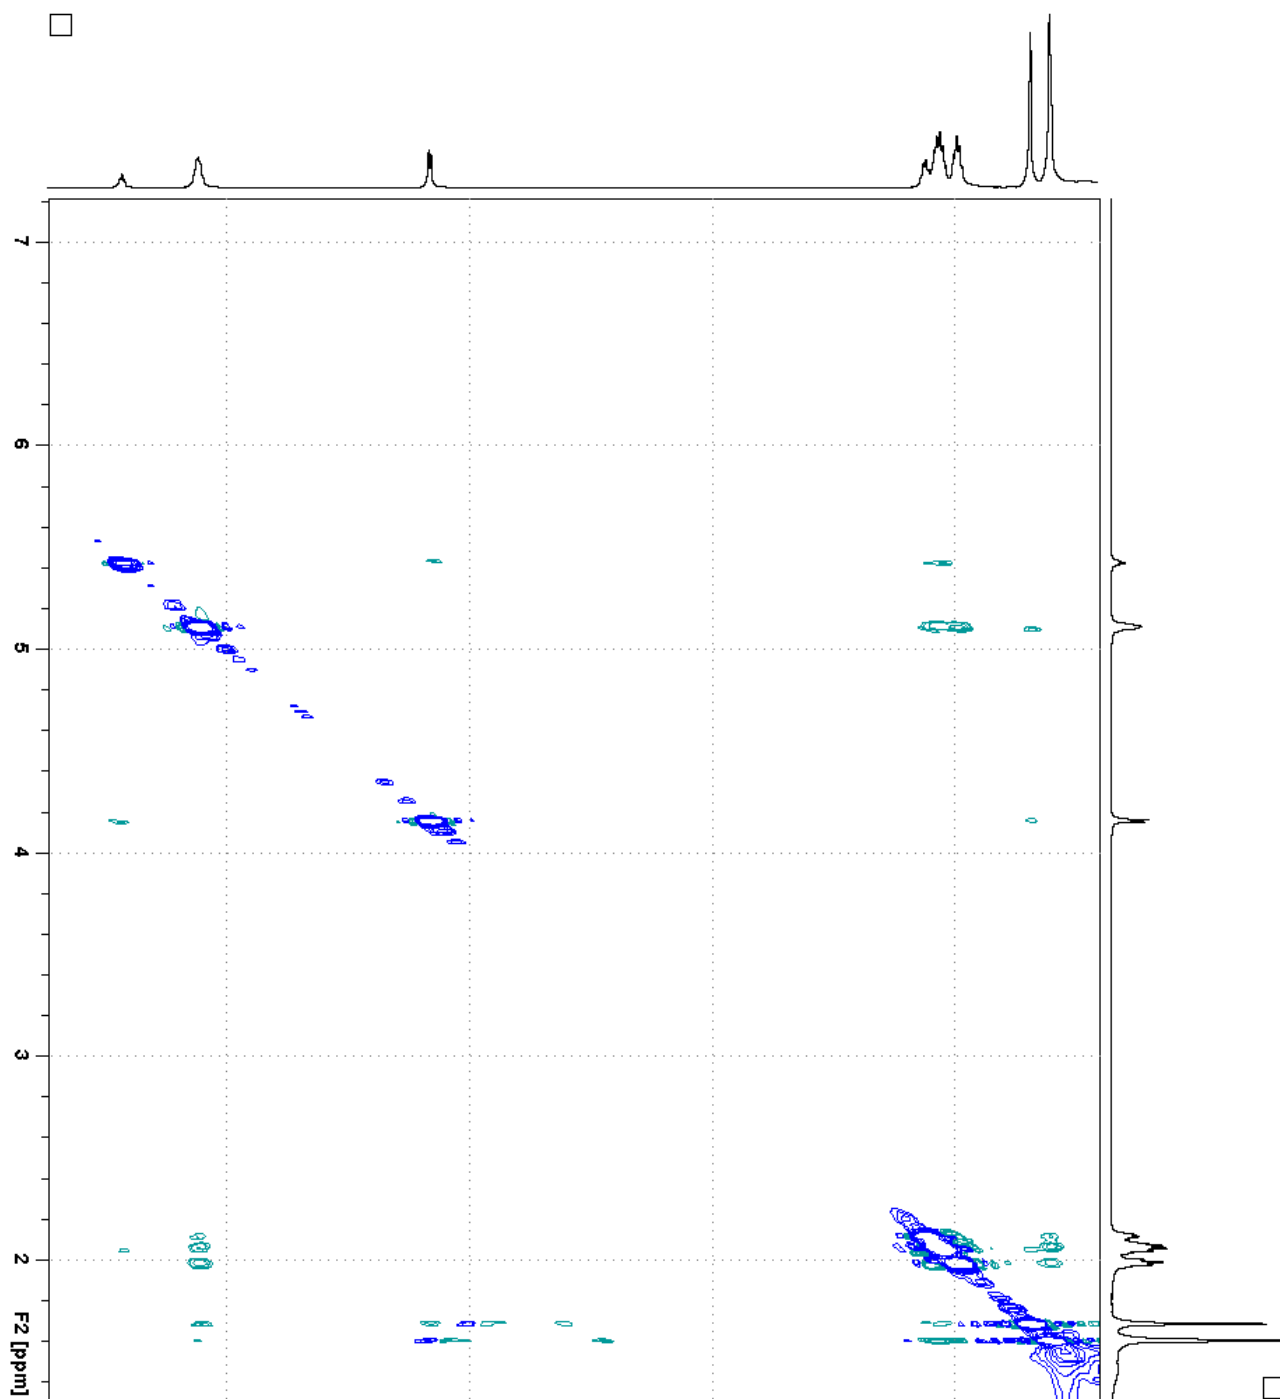

Figure S12. Accurate EIMS of lycosantalene (2).

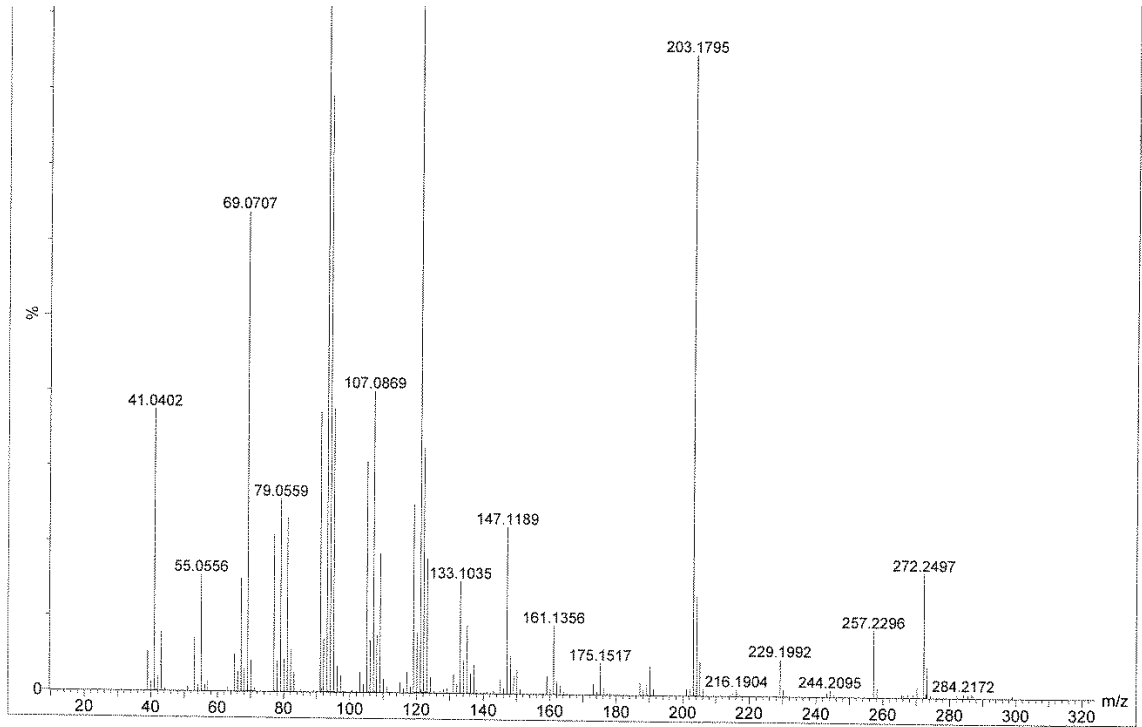

**Single Mass Analysis**

Tolerance = 40.0 PPM / DBE: min = 0.0, max = 50.0

Isotope cluster parameters: Separation = 1.0 Abundance = 1.0%

Monoisotopic Mass, Odd and Even Electron Ions

12 formula(e) evaluated with 1 results within limits (all results (up to 1000) for each mass)

diterpene a  
jxz-04-29-04 1435 (14.959) Cm (1435:1436-1428:1431x1.050)

29-Apr-2014  
TOF MS EI+  
6.18e3

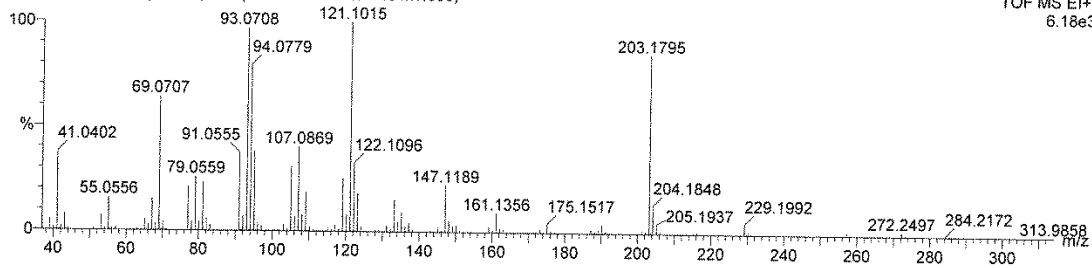

| Mass     | Calc. Mass | mDa  | PPM  | DBE | Score | Formula |
|----------|------------|------|------|-----|-------|---------|
| 272.2497 | 272.2504   | -0.7 | -2.6 | 5.0 | 1     | C20 H32 |

Figure S13.  $^1\text{H}$  NMR spectrum of **2**.

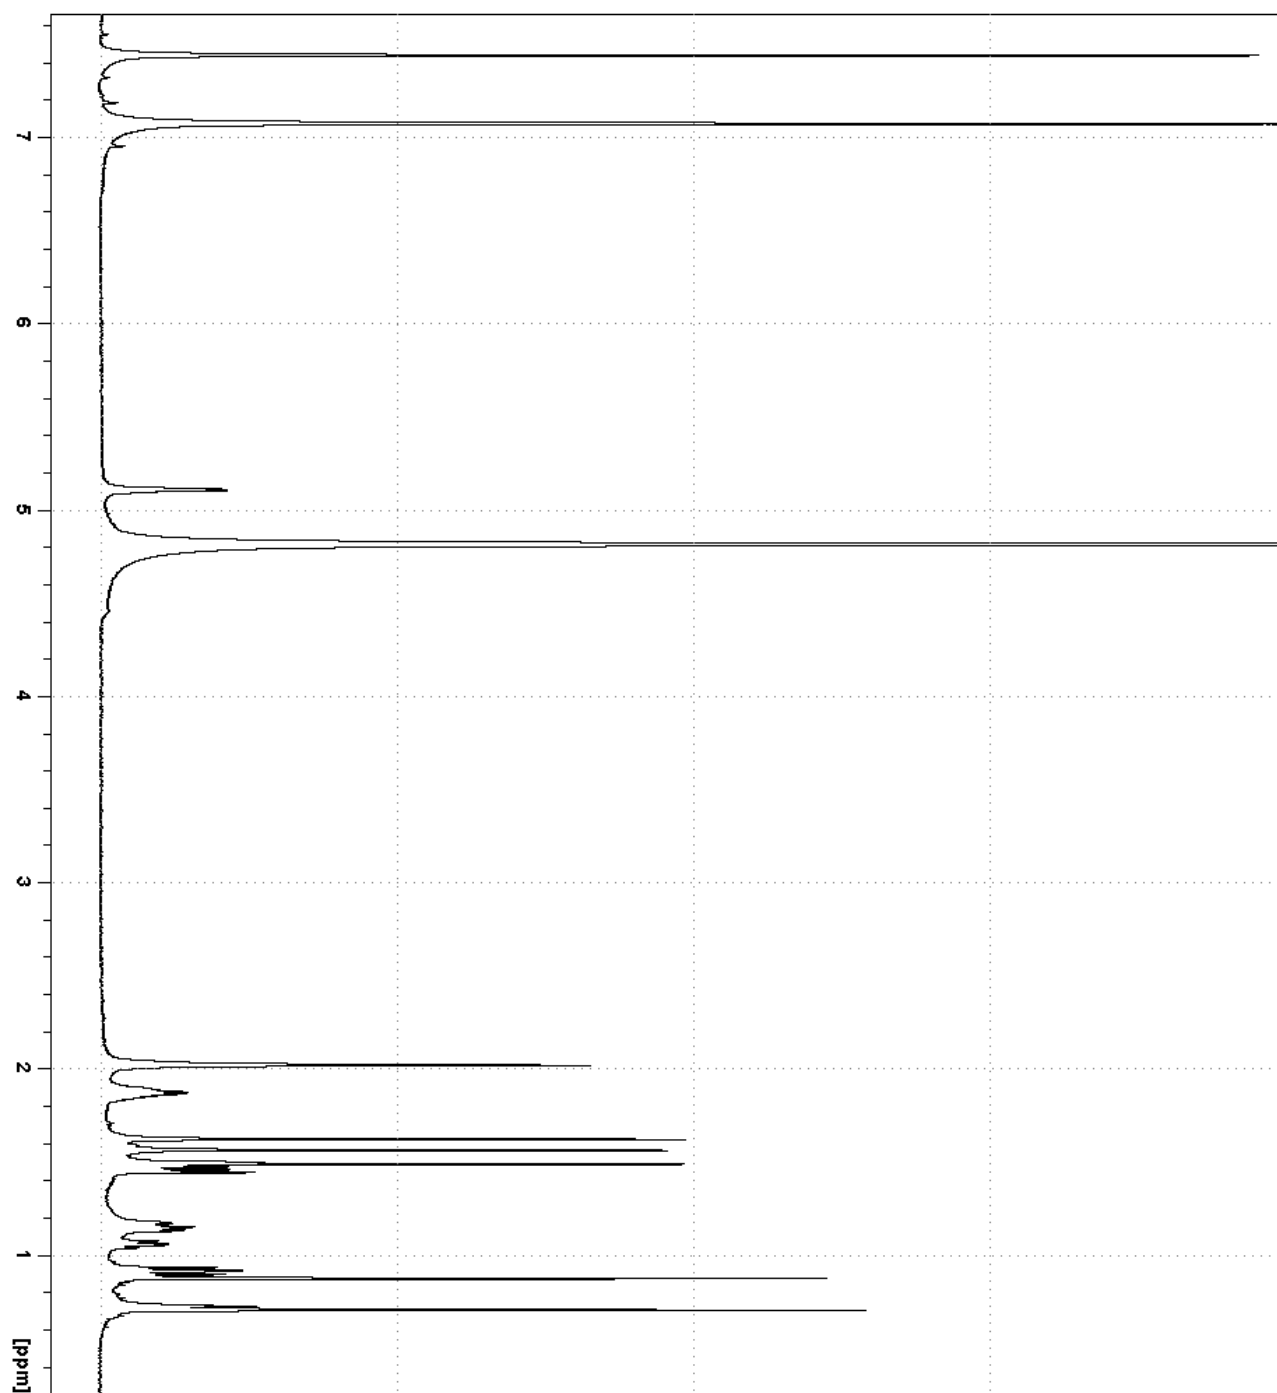

Figure S14.  $^{13}\text{C}$  NMR spectrum of **2**.

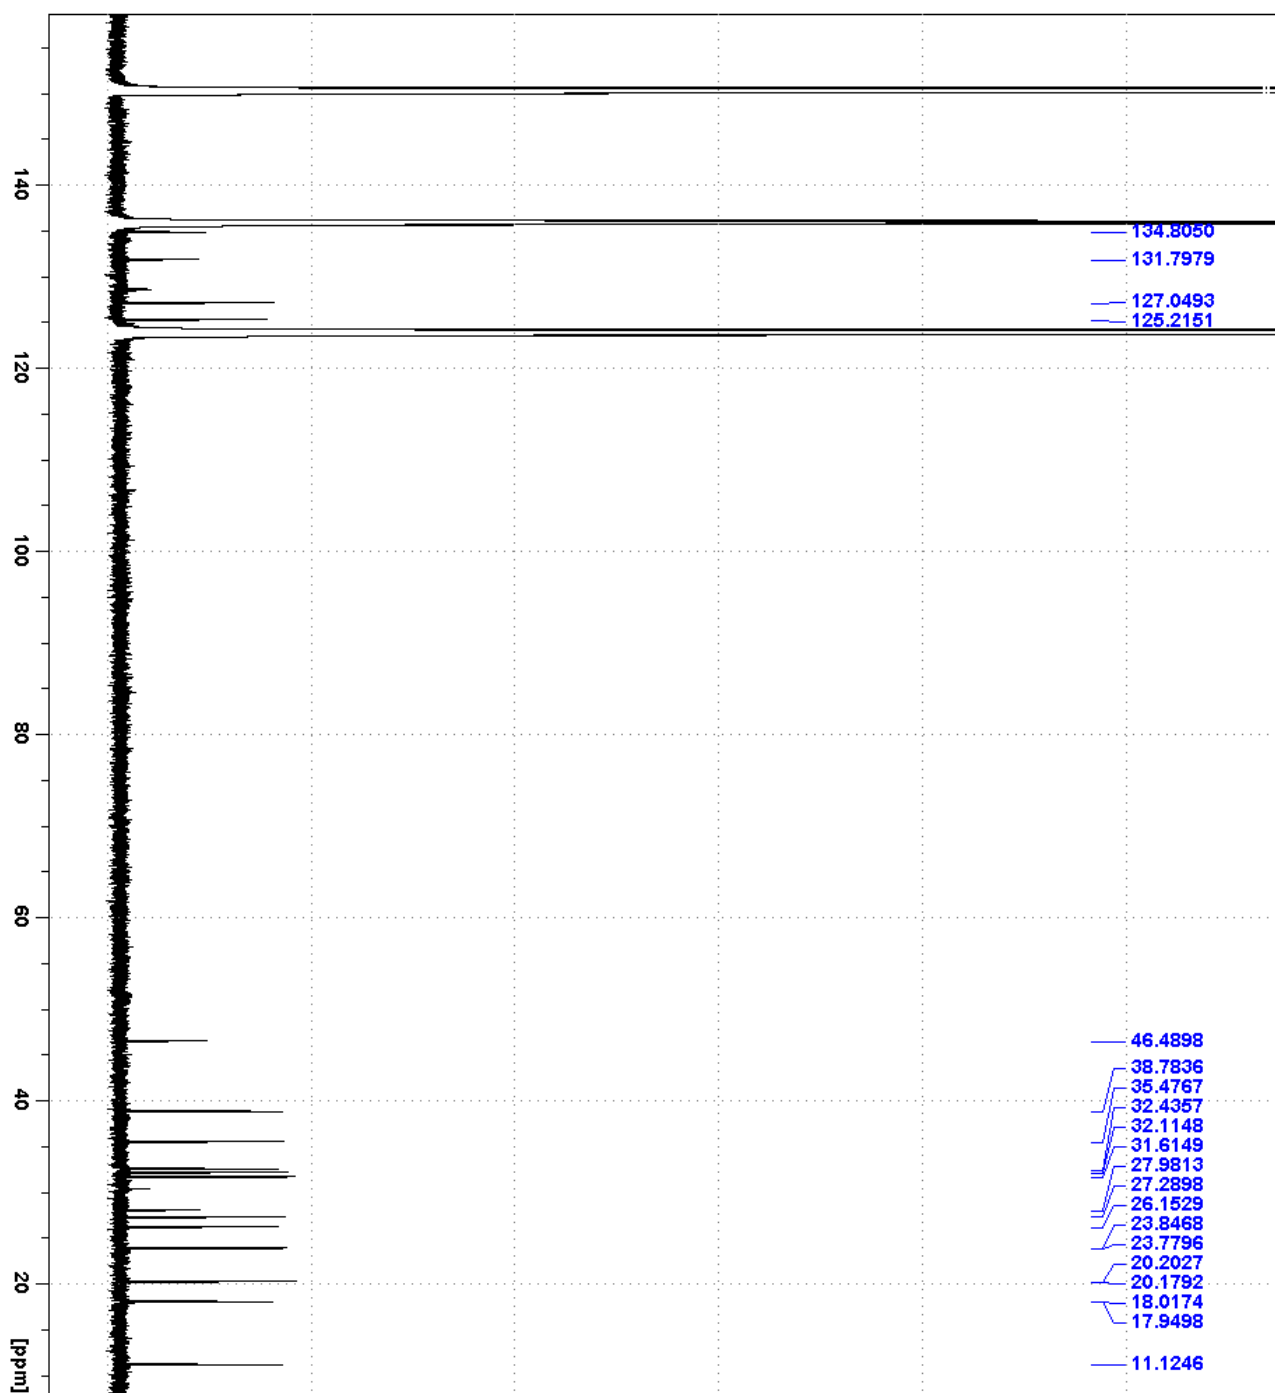

Figure S15.  $^1\text{H}$ - $^1\text{H}$  COSY spectrum of **2**.

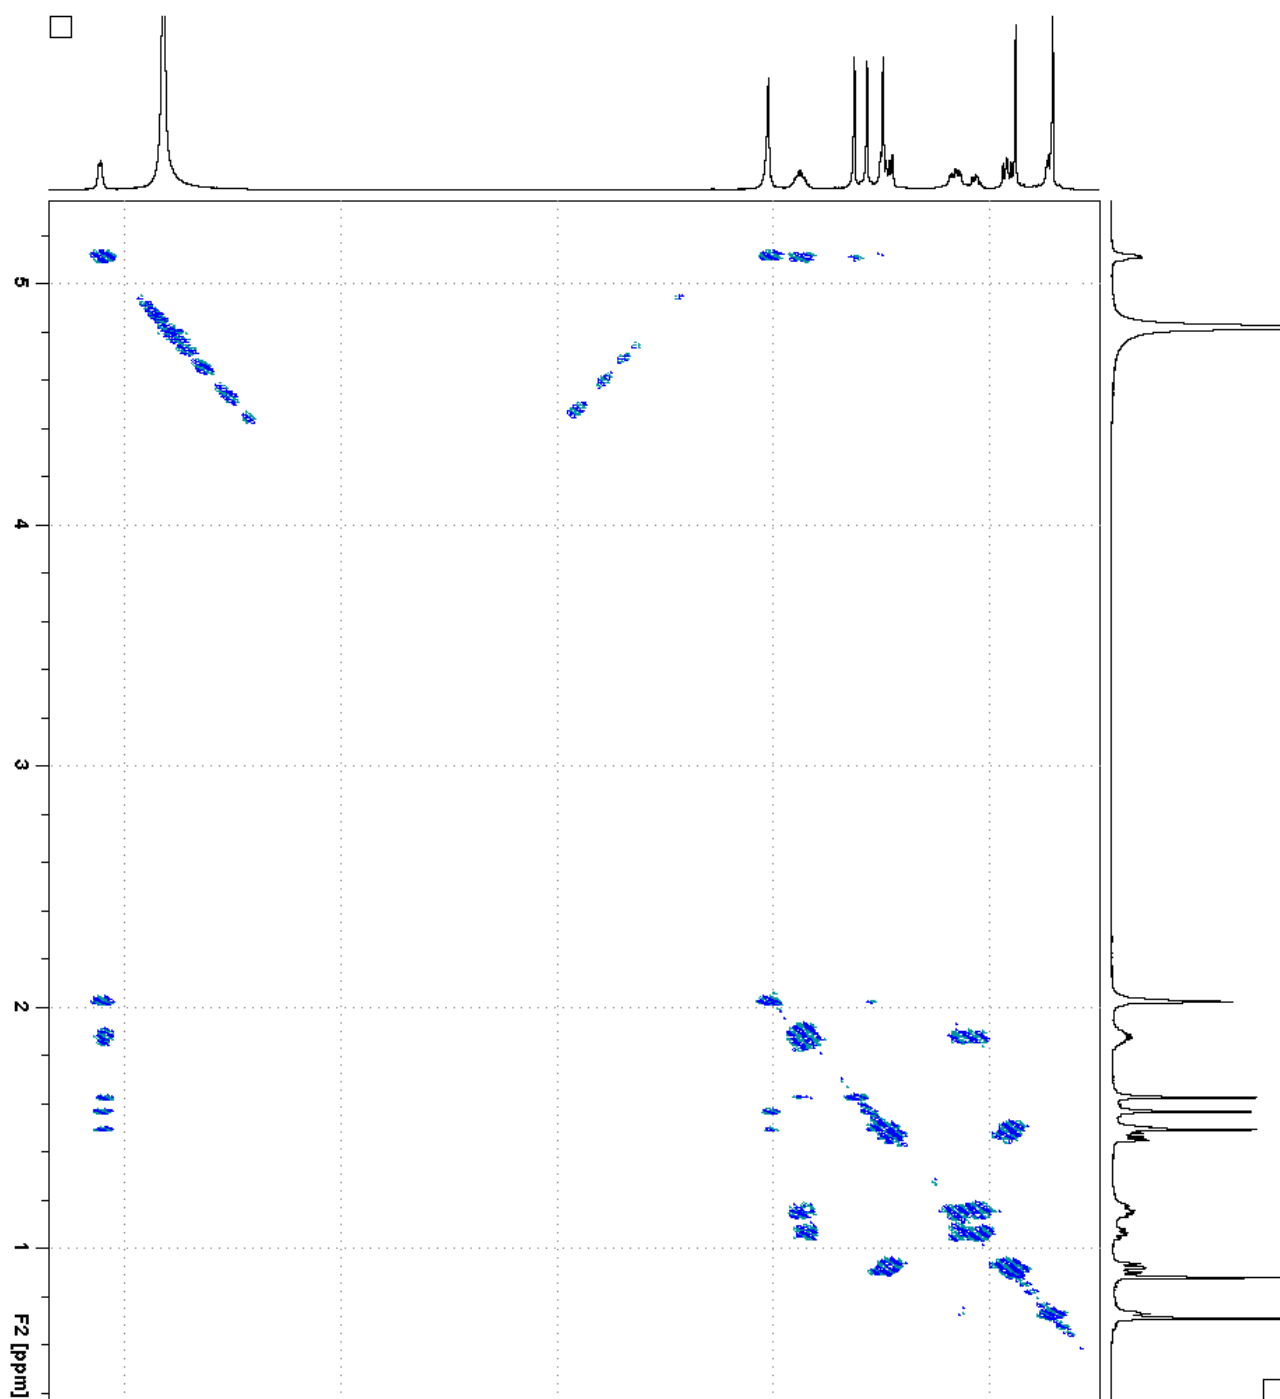

Figure S16. HSQC spectrum of 2.

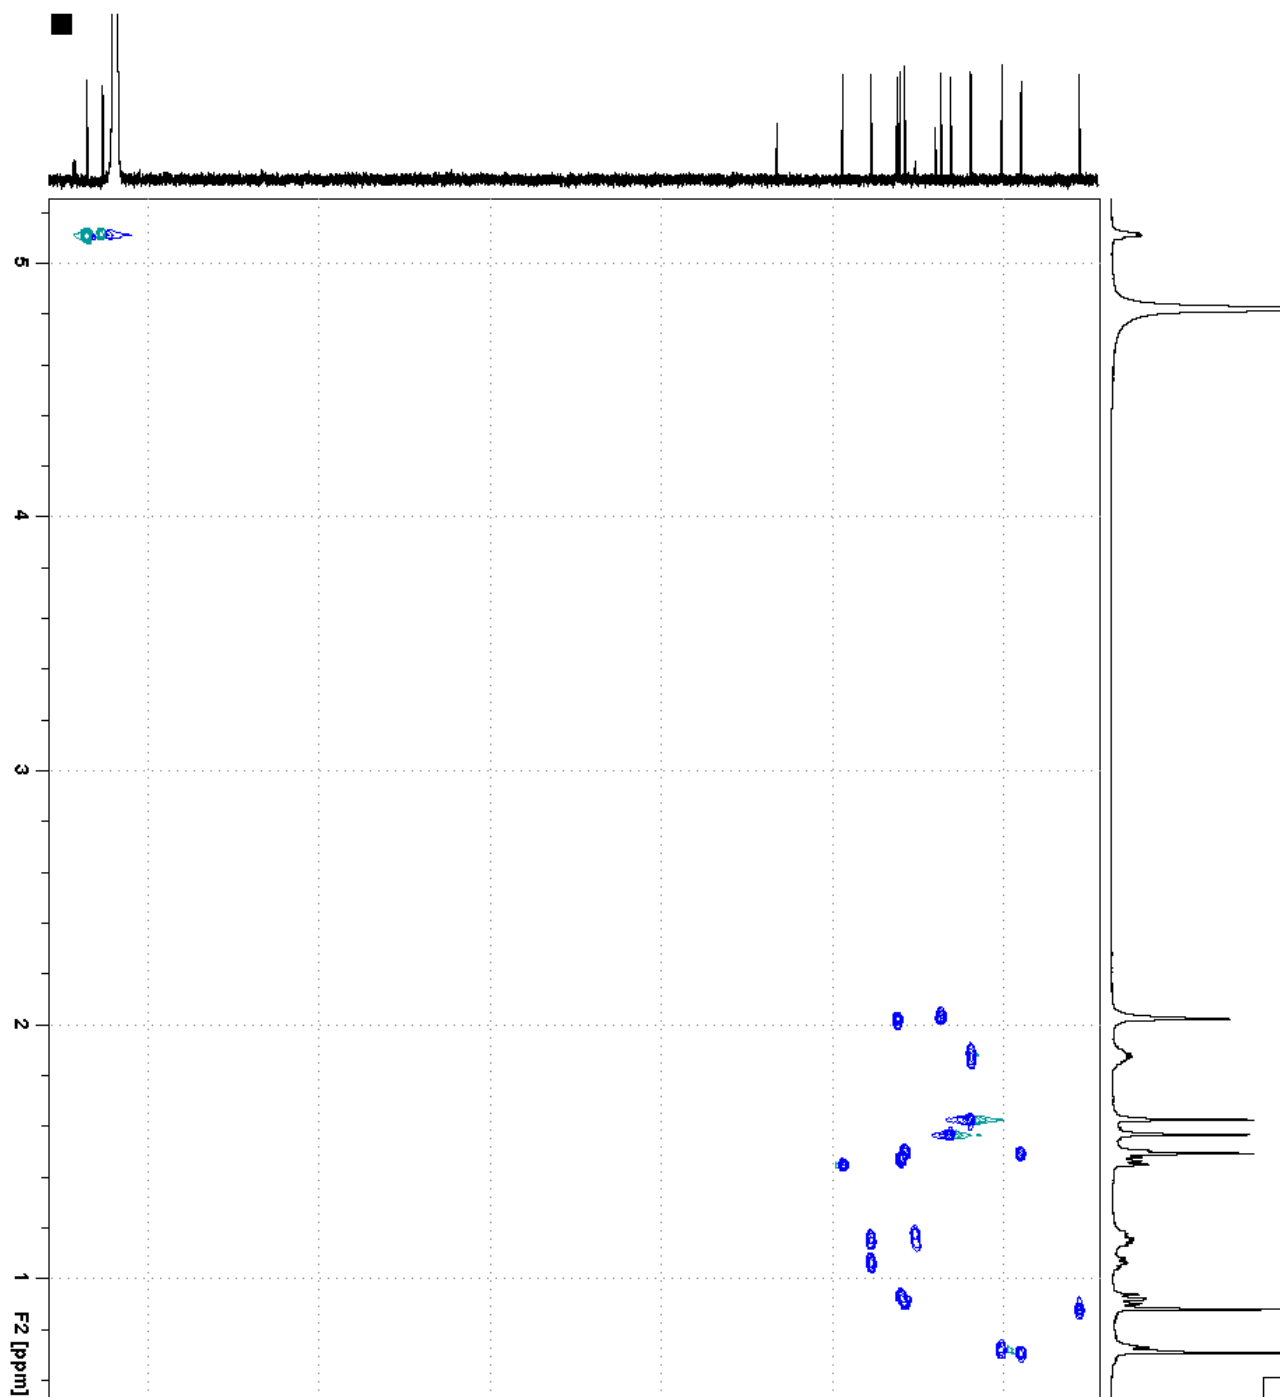



Figure S17. HMBC spectrum of 2.

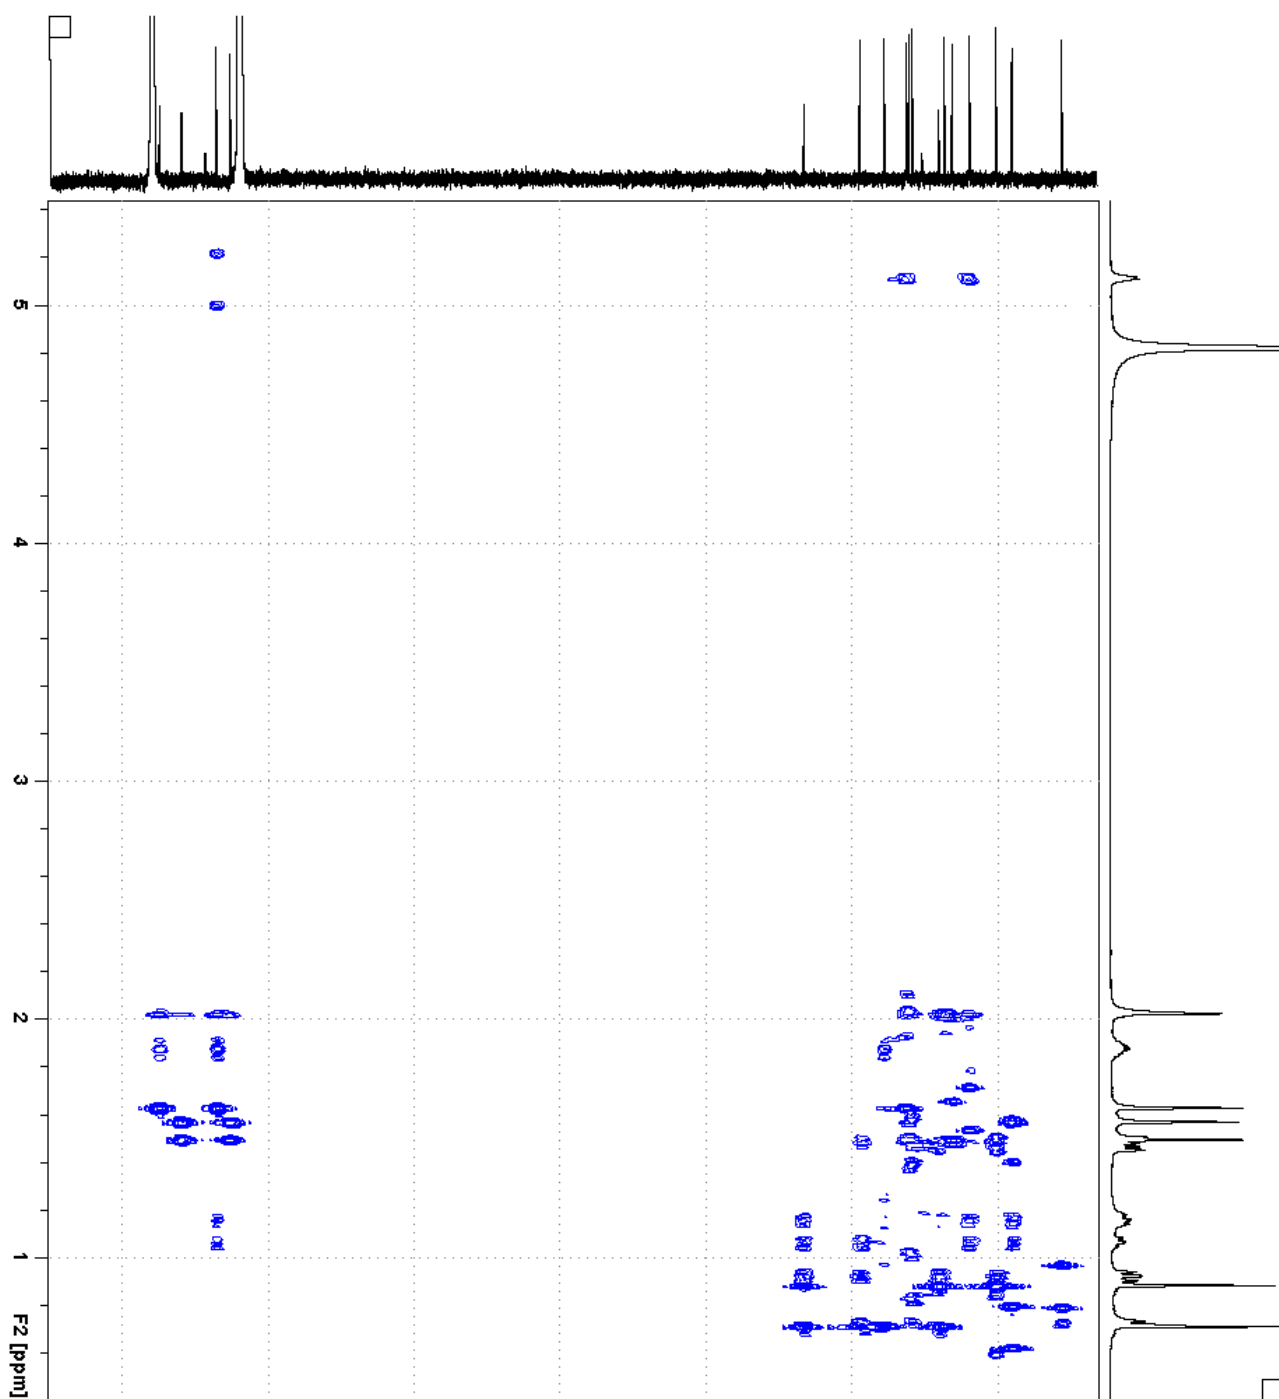

Figure S18 Accurate EIMS of 3.

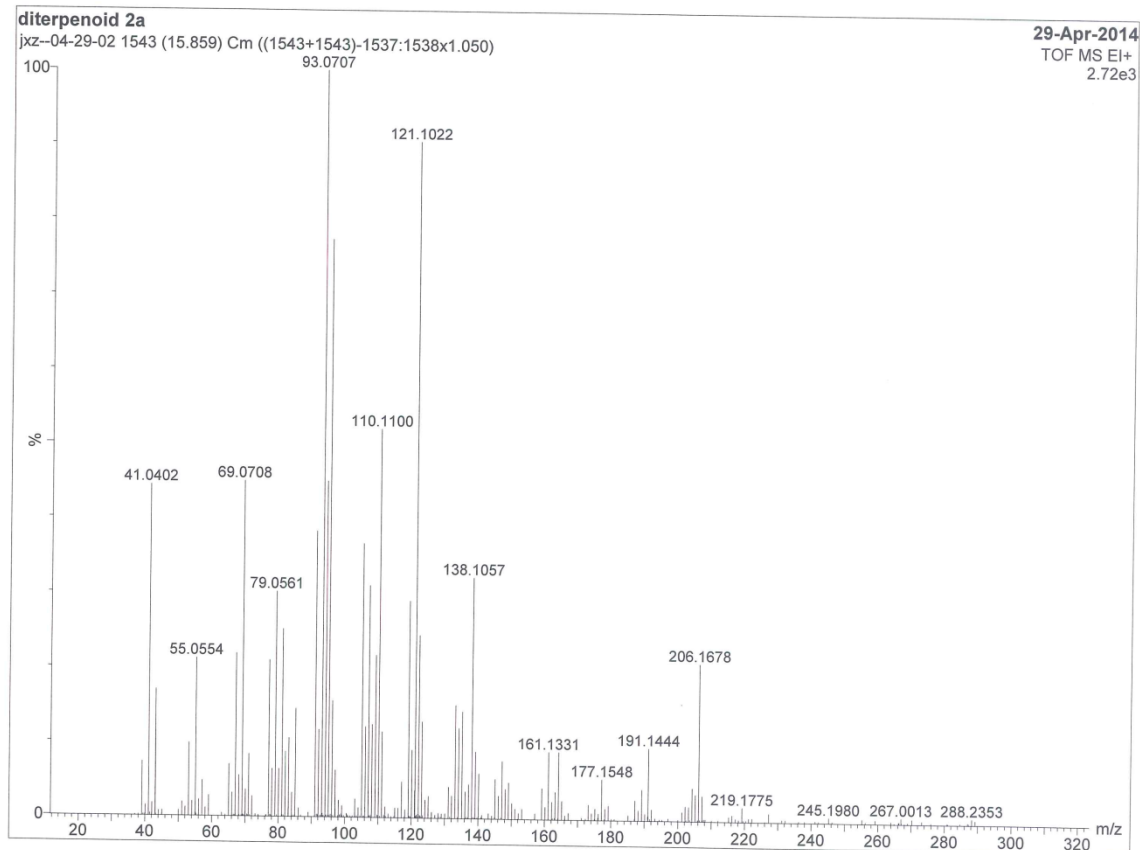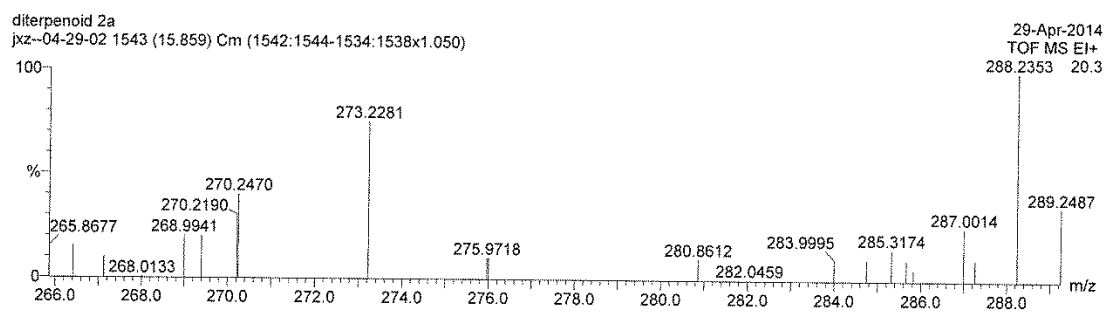

| Mass     | Calc. Mass | mDa   | PPM   | DBE | Score | Formula   |
|----------|------------|-------|-------|-----|-------|-----------|
| 288.2353 | 288.2453   | -10.0 | -34.7 | 5.0 | 1     | C20 H32 O |

Figure S19.  $^1\text{H}$  NMR spectrum of **3**.

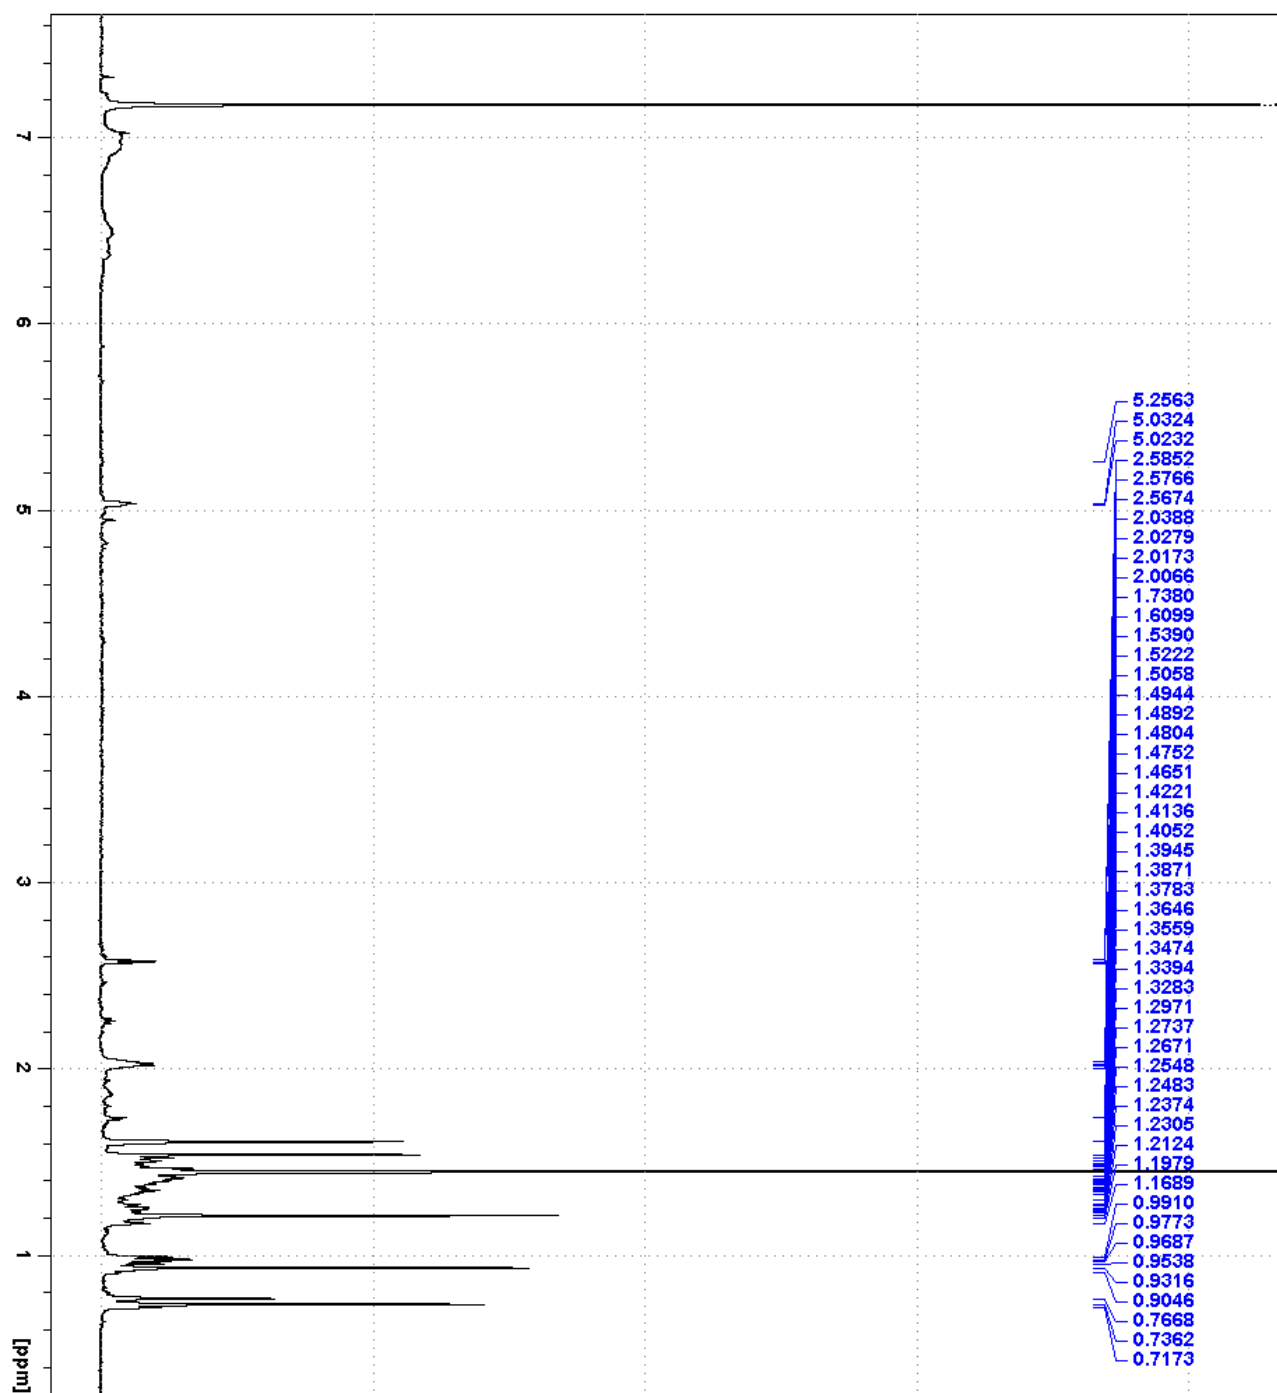

Figure S20.  $^{13}\text{C}$  NMR spectrum of **3**.

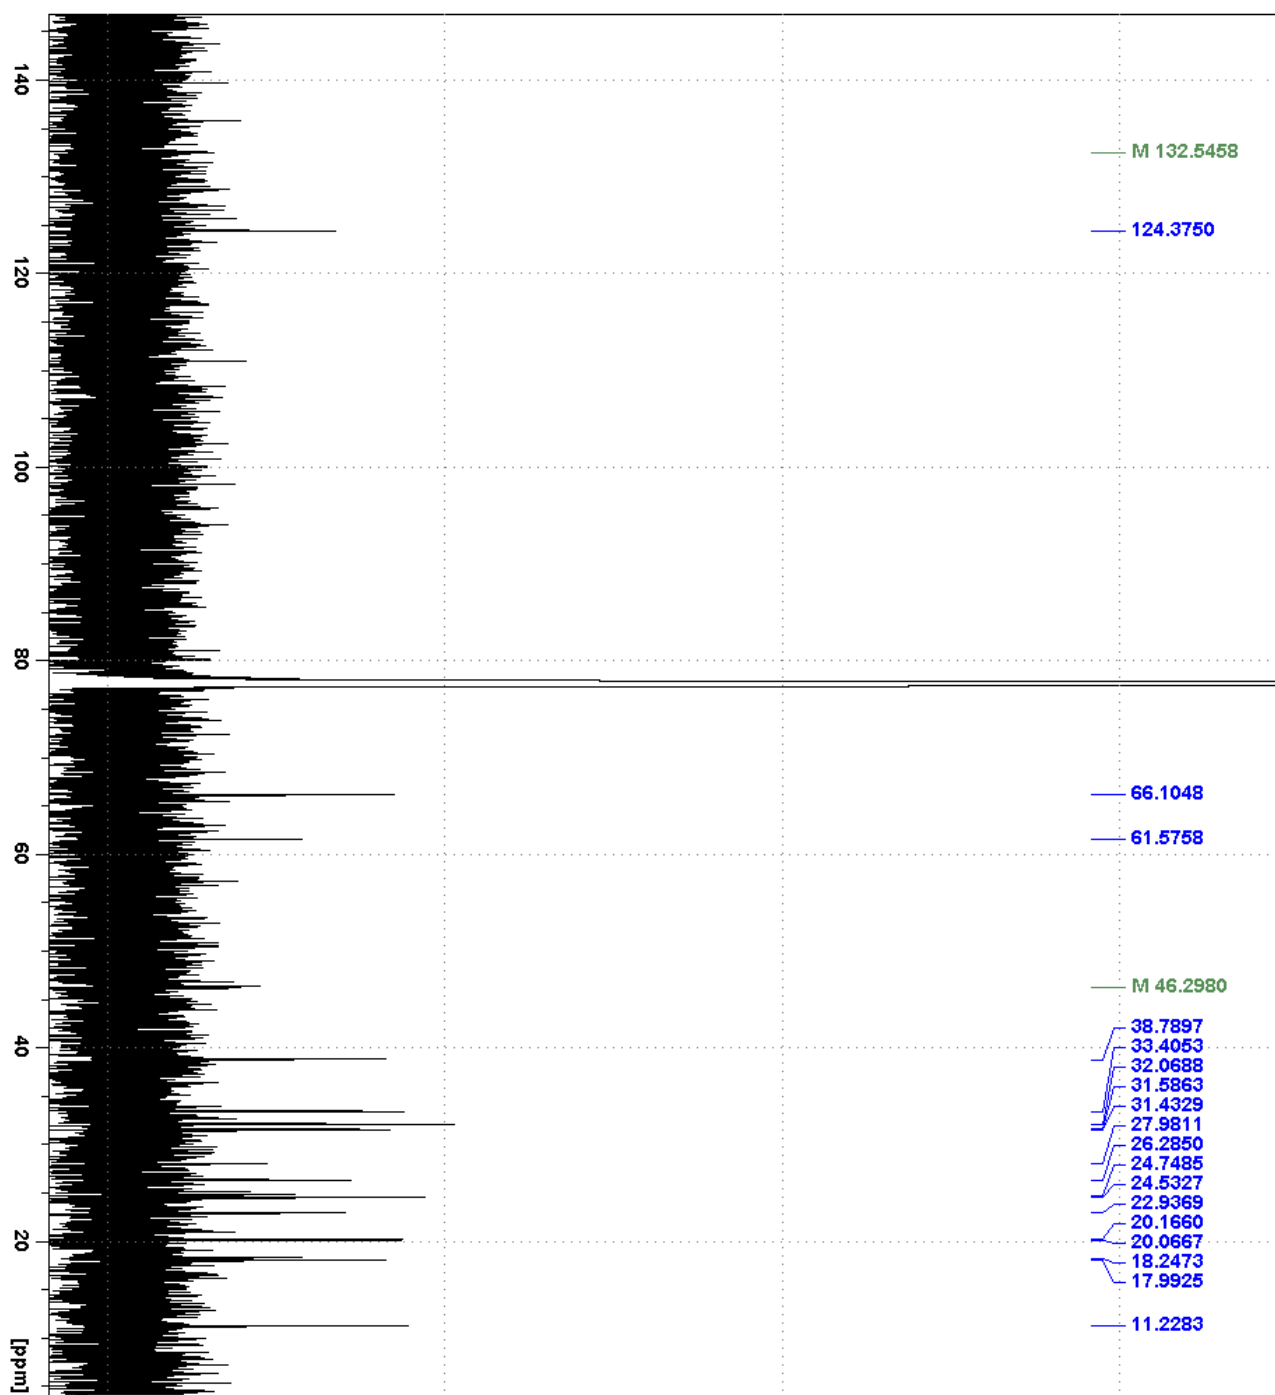

Figure S21.  $^1\text{H}$ - $^1\text{H}$  COSY spectrum of **3**.

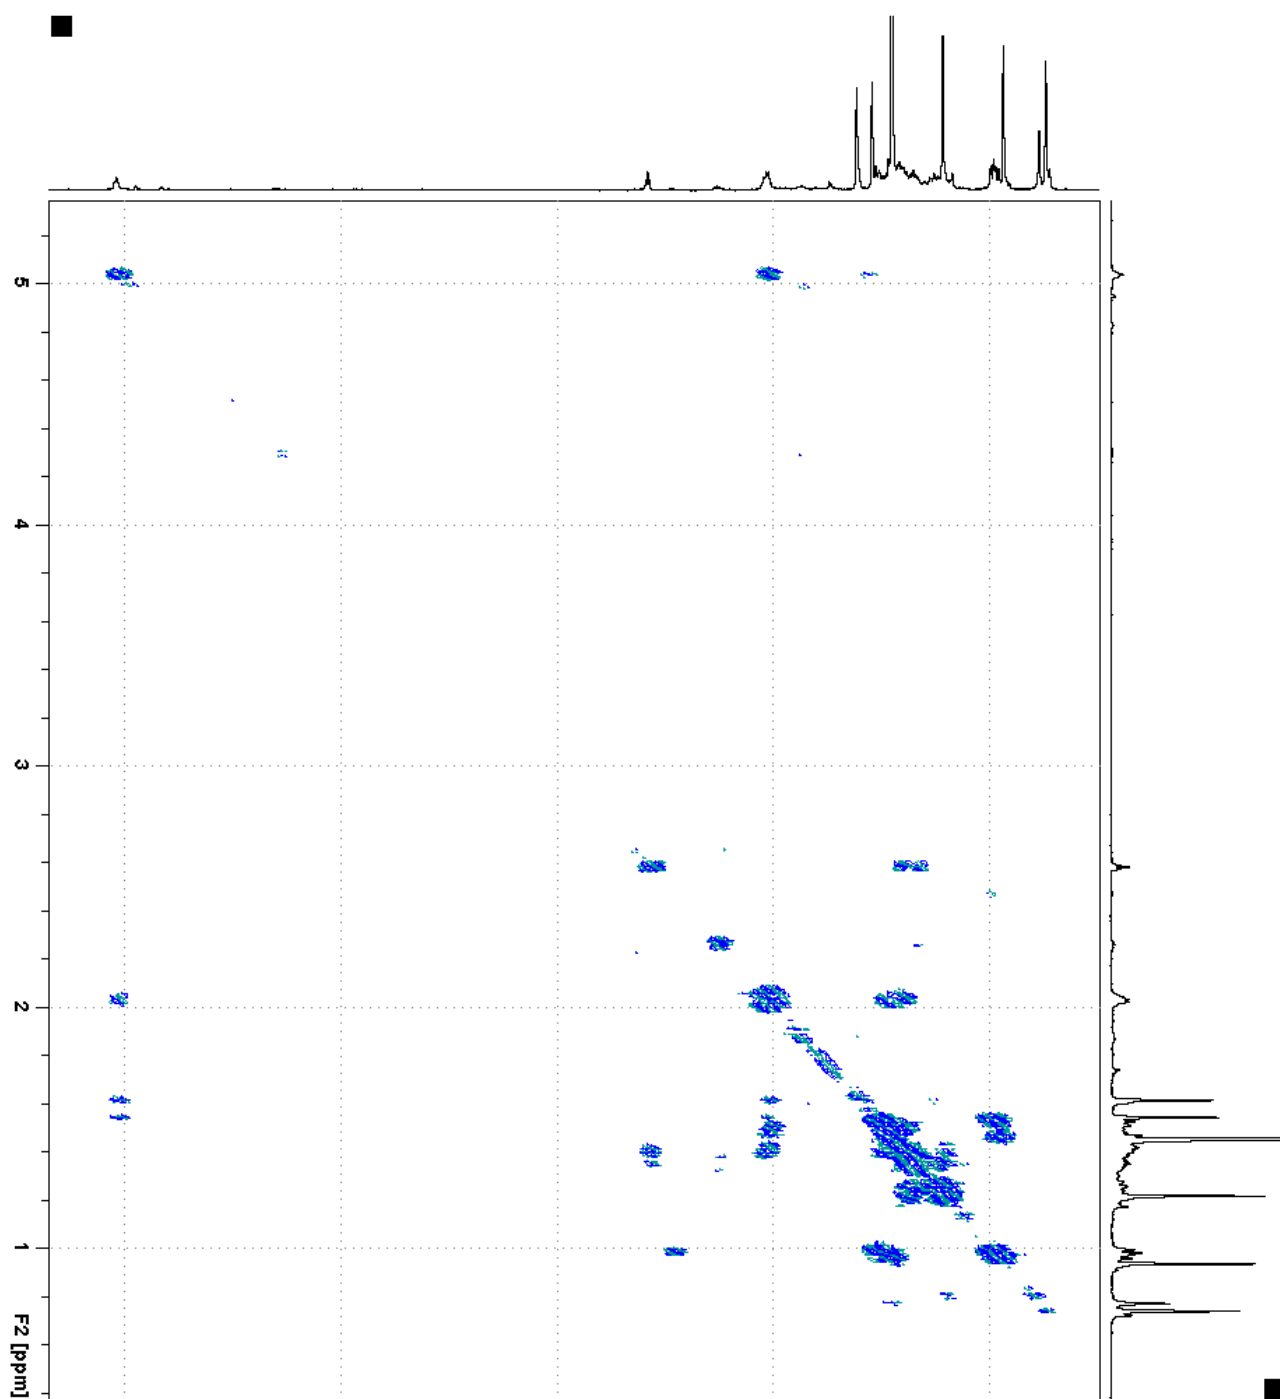

Figure S22. HSQC spectrum of **3**.

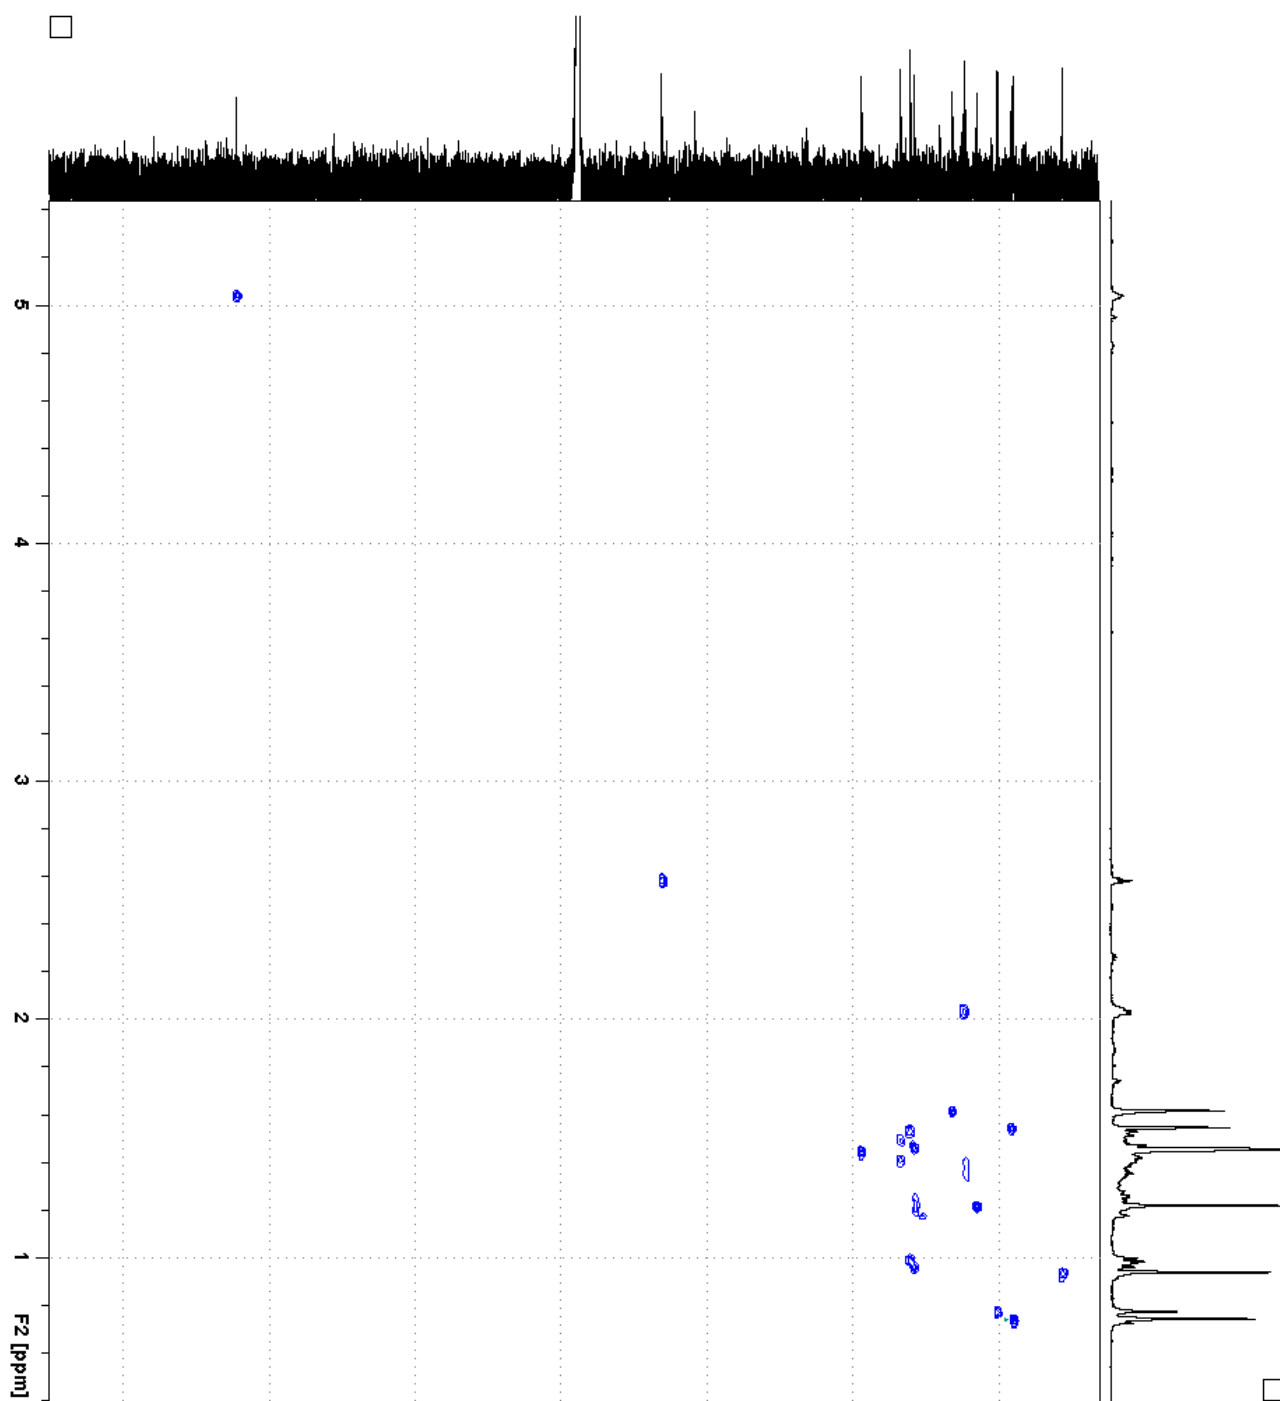

Figure S23. HMBC spectrum of **3**.

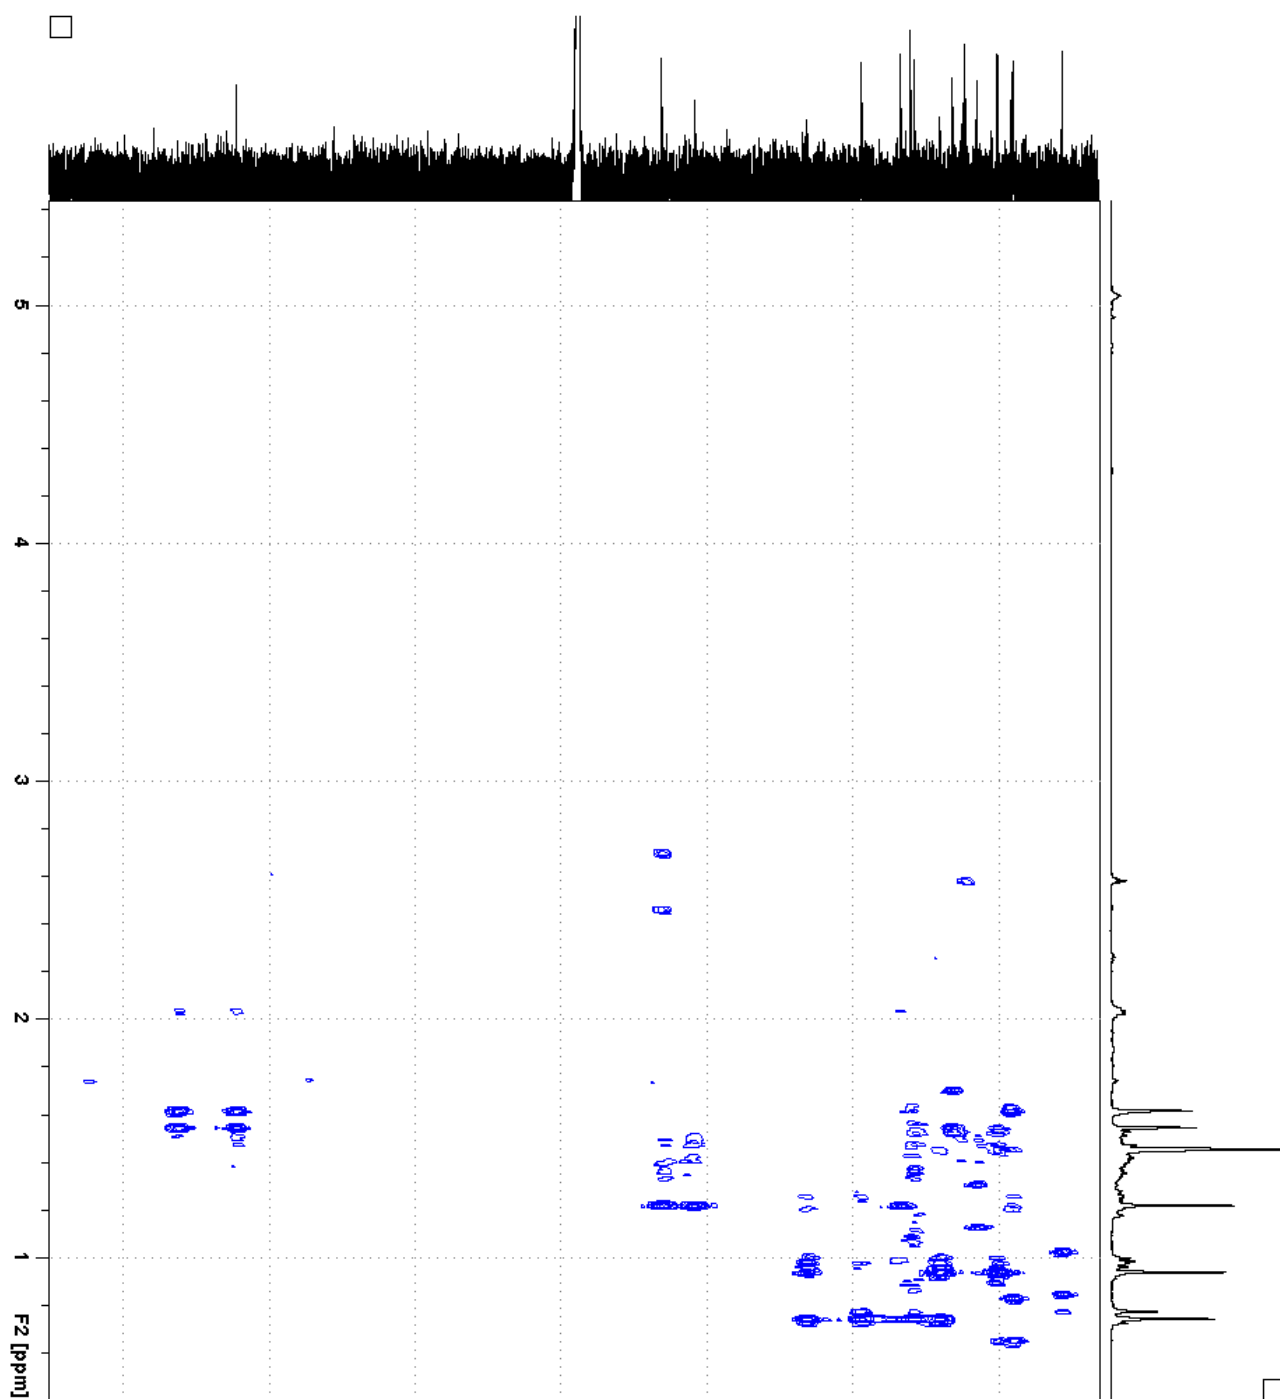

Figure S24 Accurate EIMS of 4.

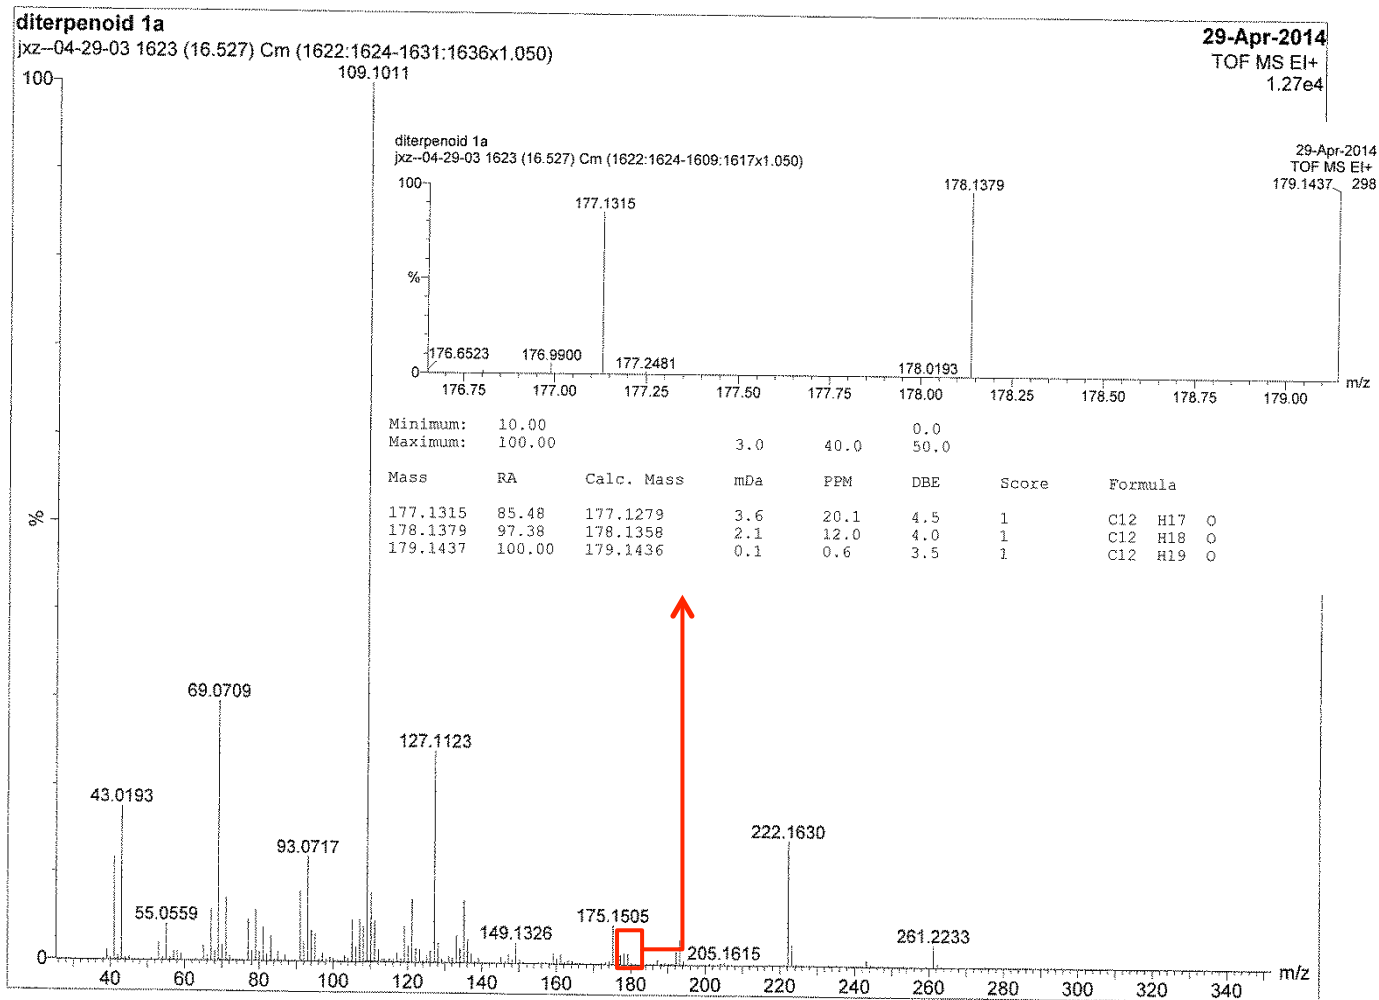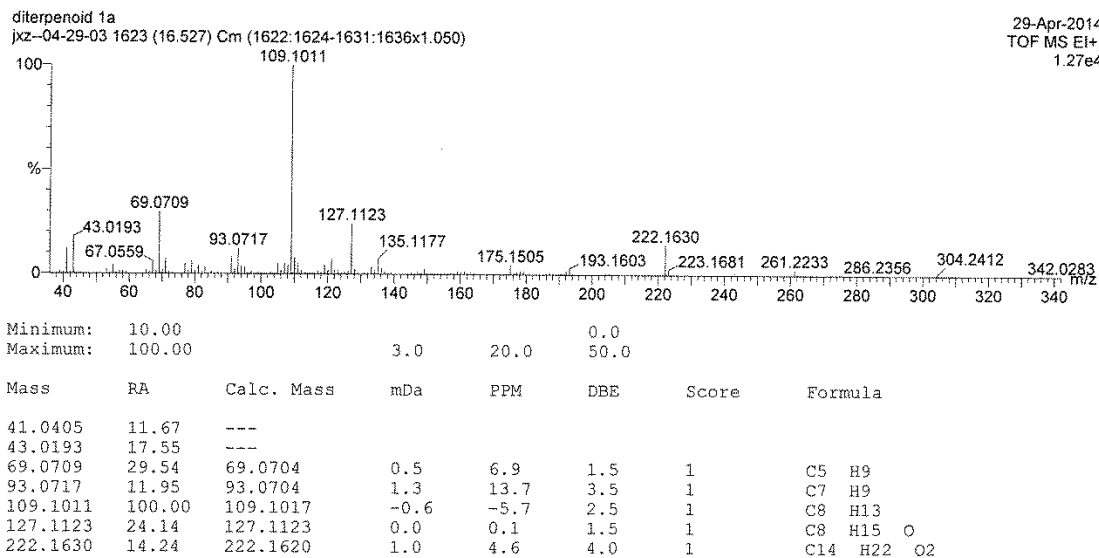



Figure S25.  $^1\text{H}$  NMR spectrum of 4.

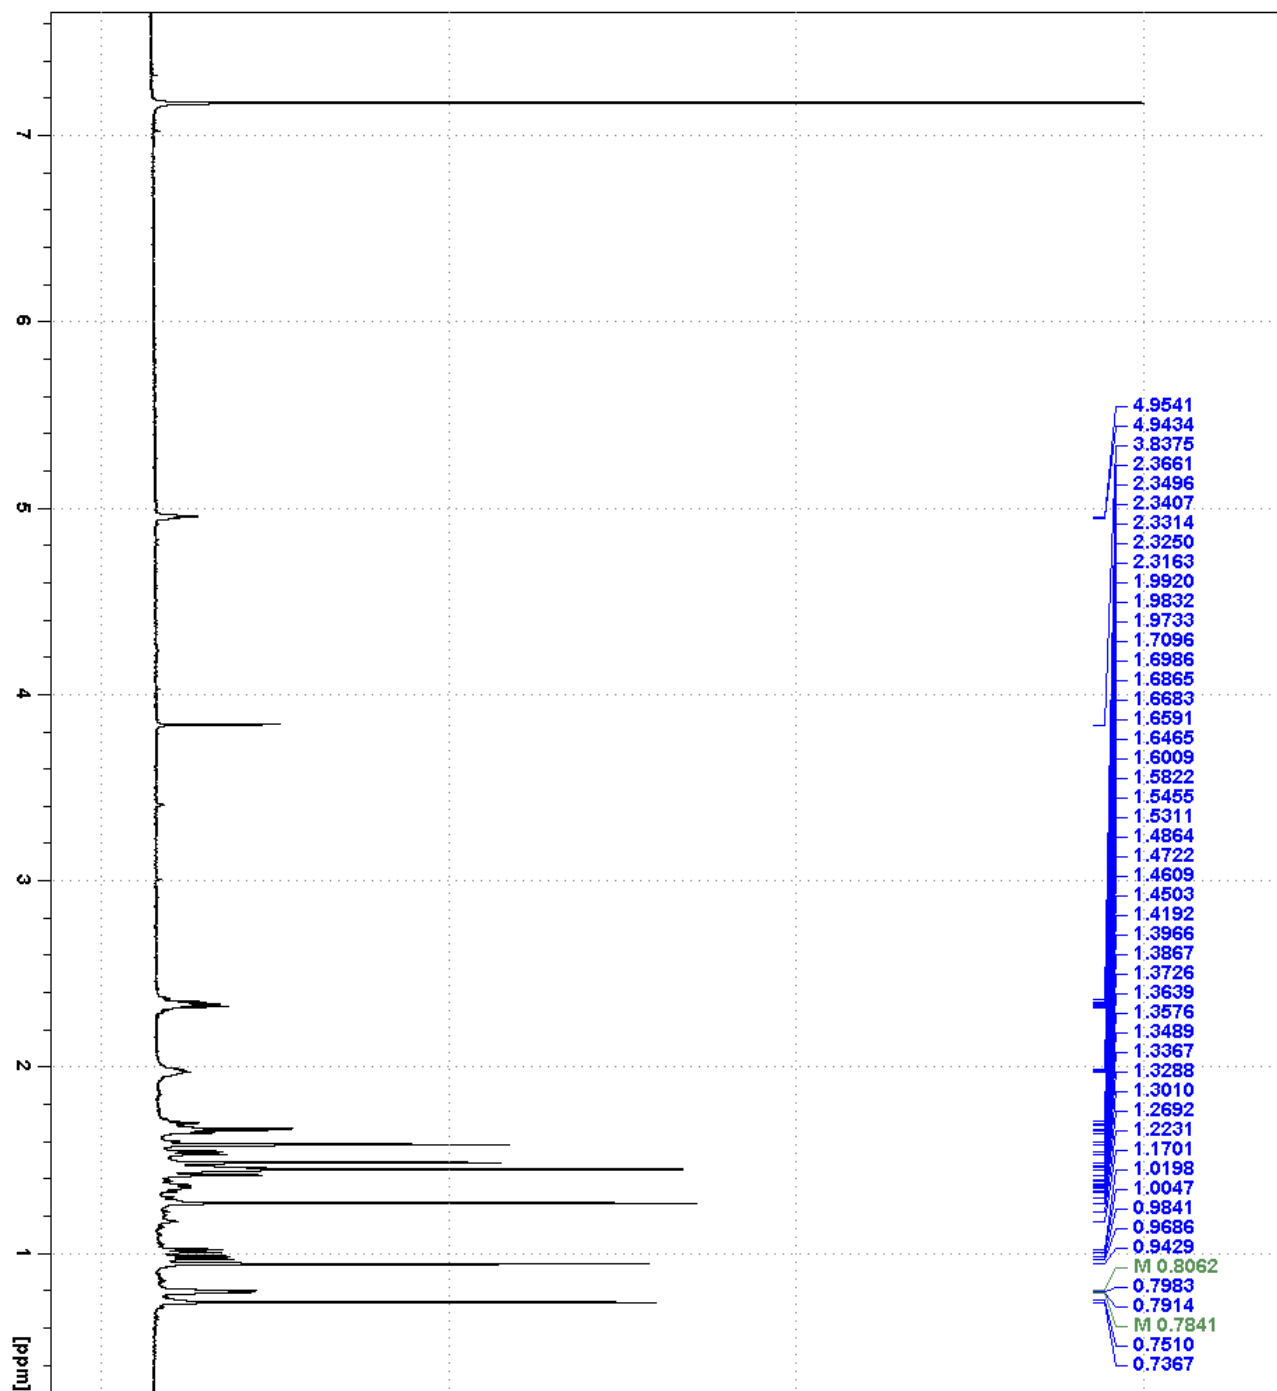

Figure S26.  $^{13}\text{C}$  NMR spectrum of 4.

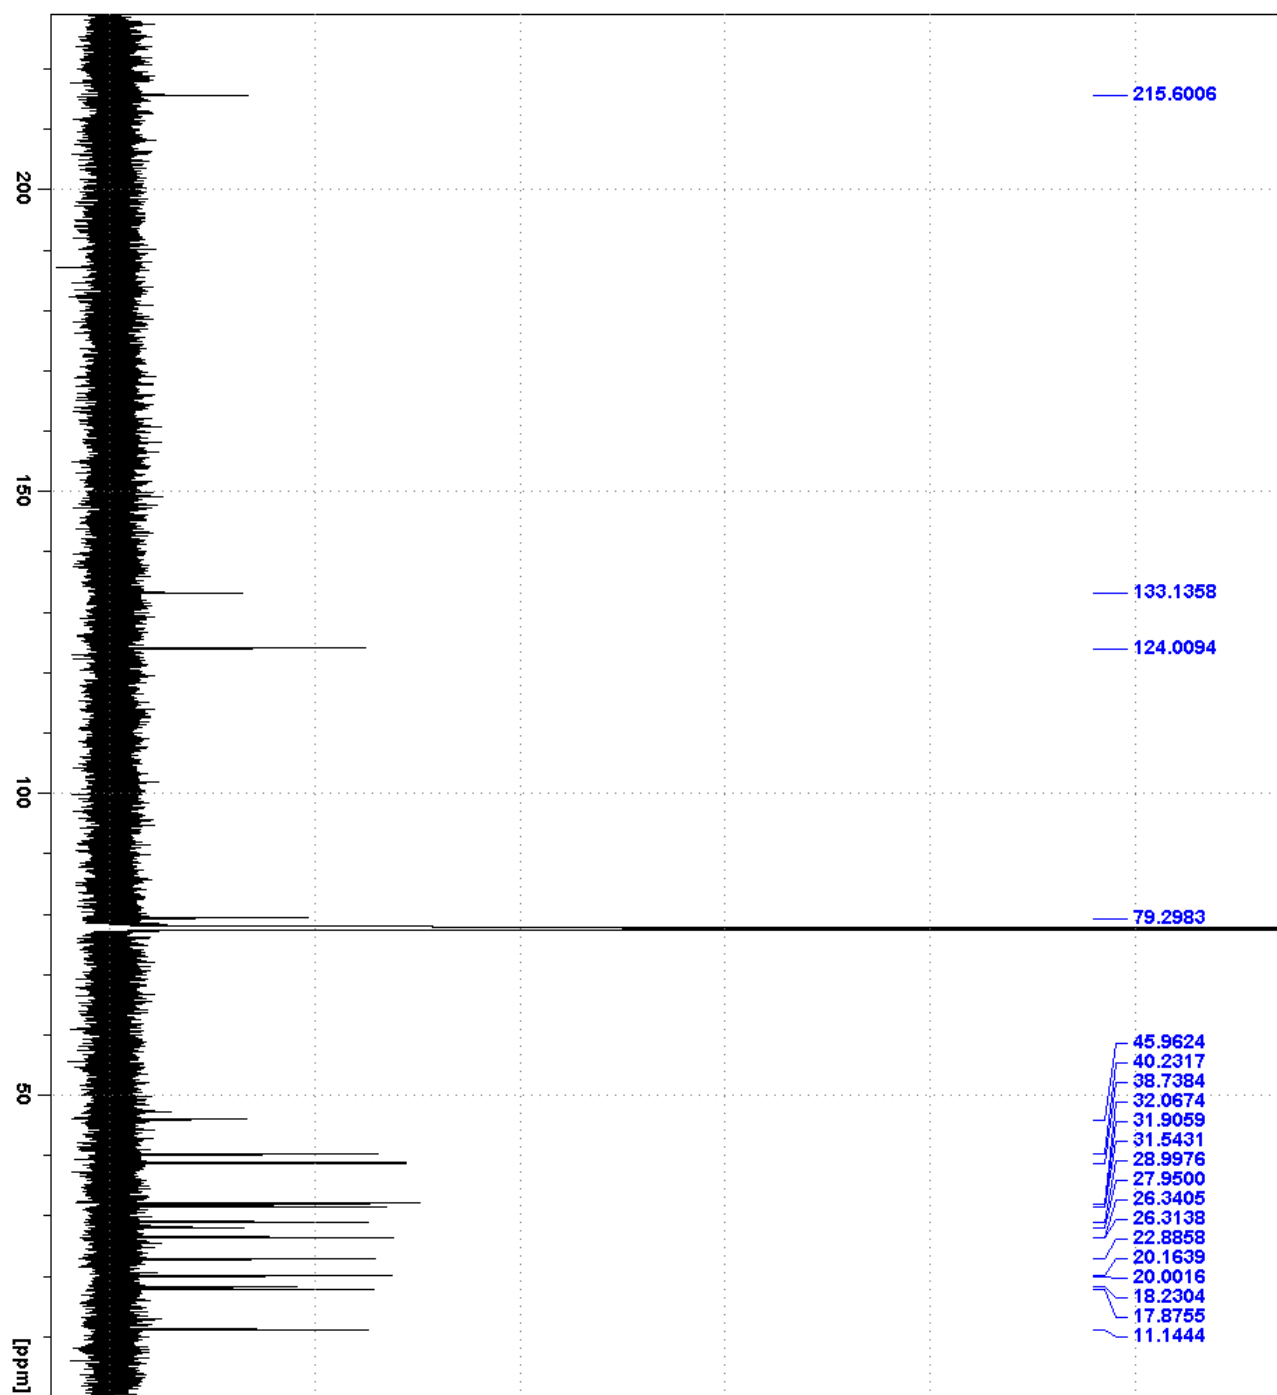

Figure S27.  $^1\text{H}$ - $^1\text{H}$  COSY spectrum of **4**.

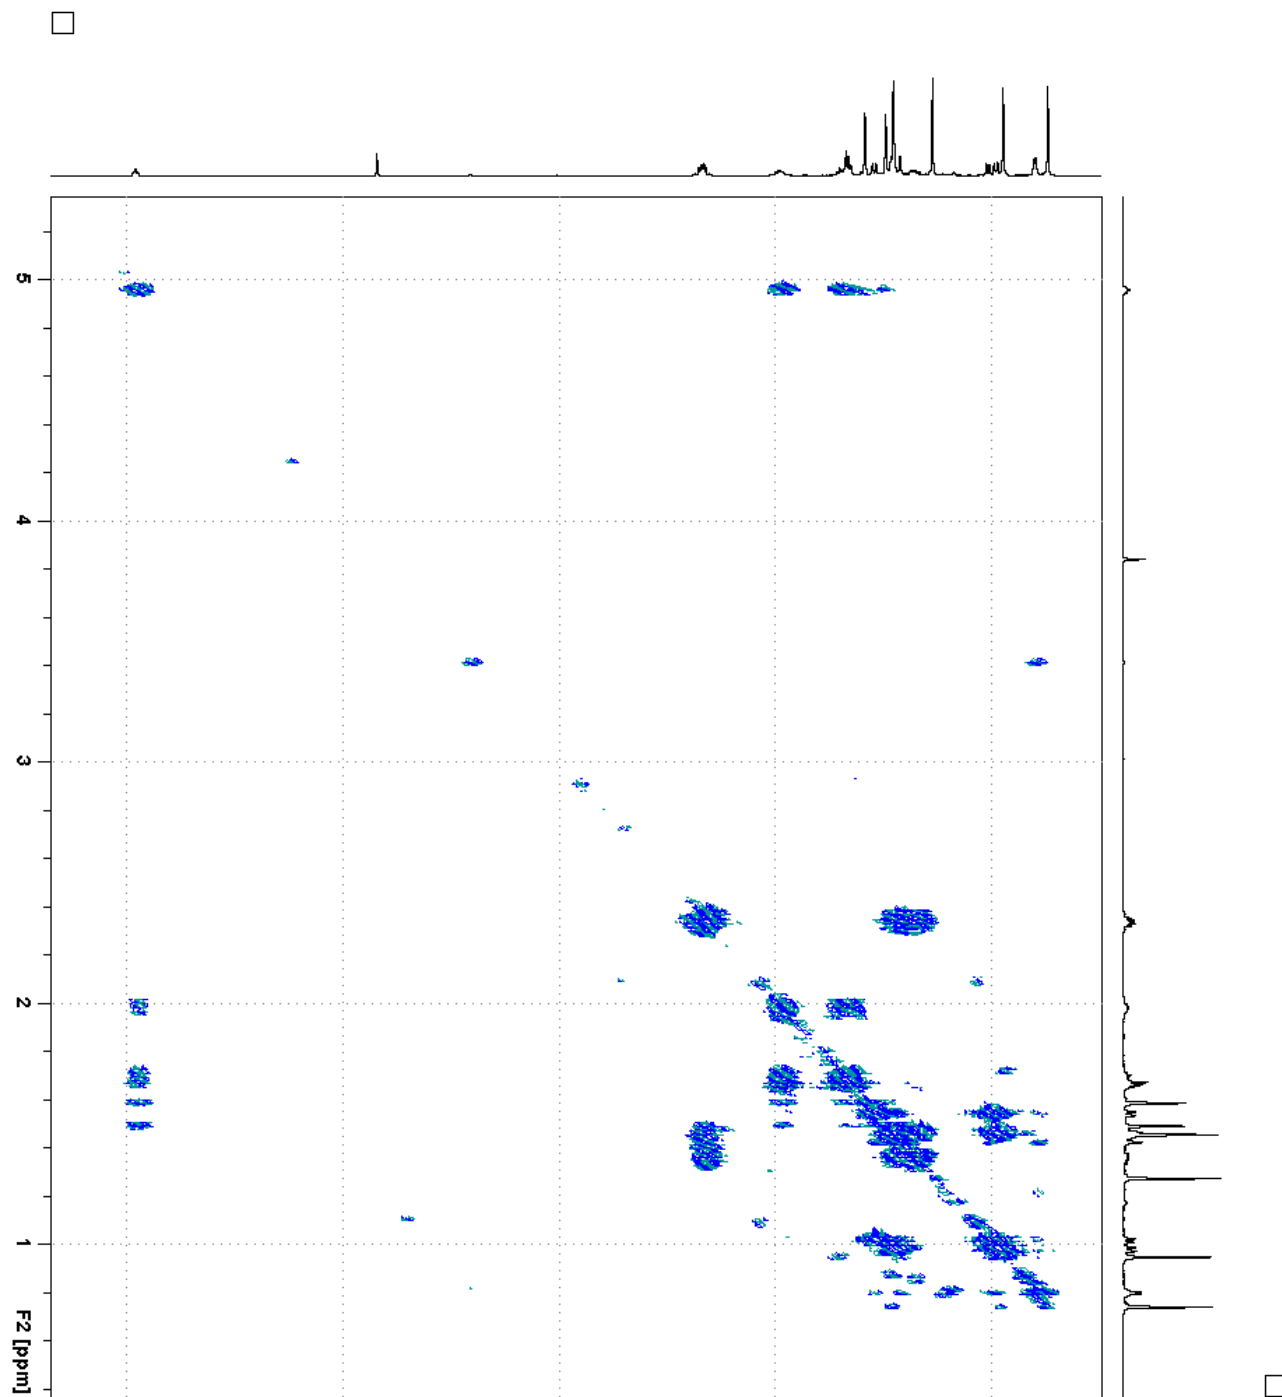

Figure S28. HSQC spectrum of 4.

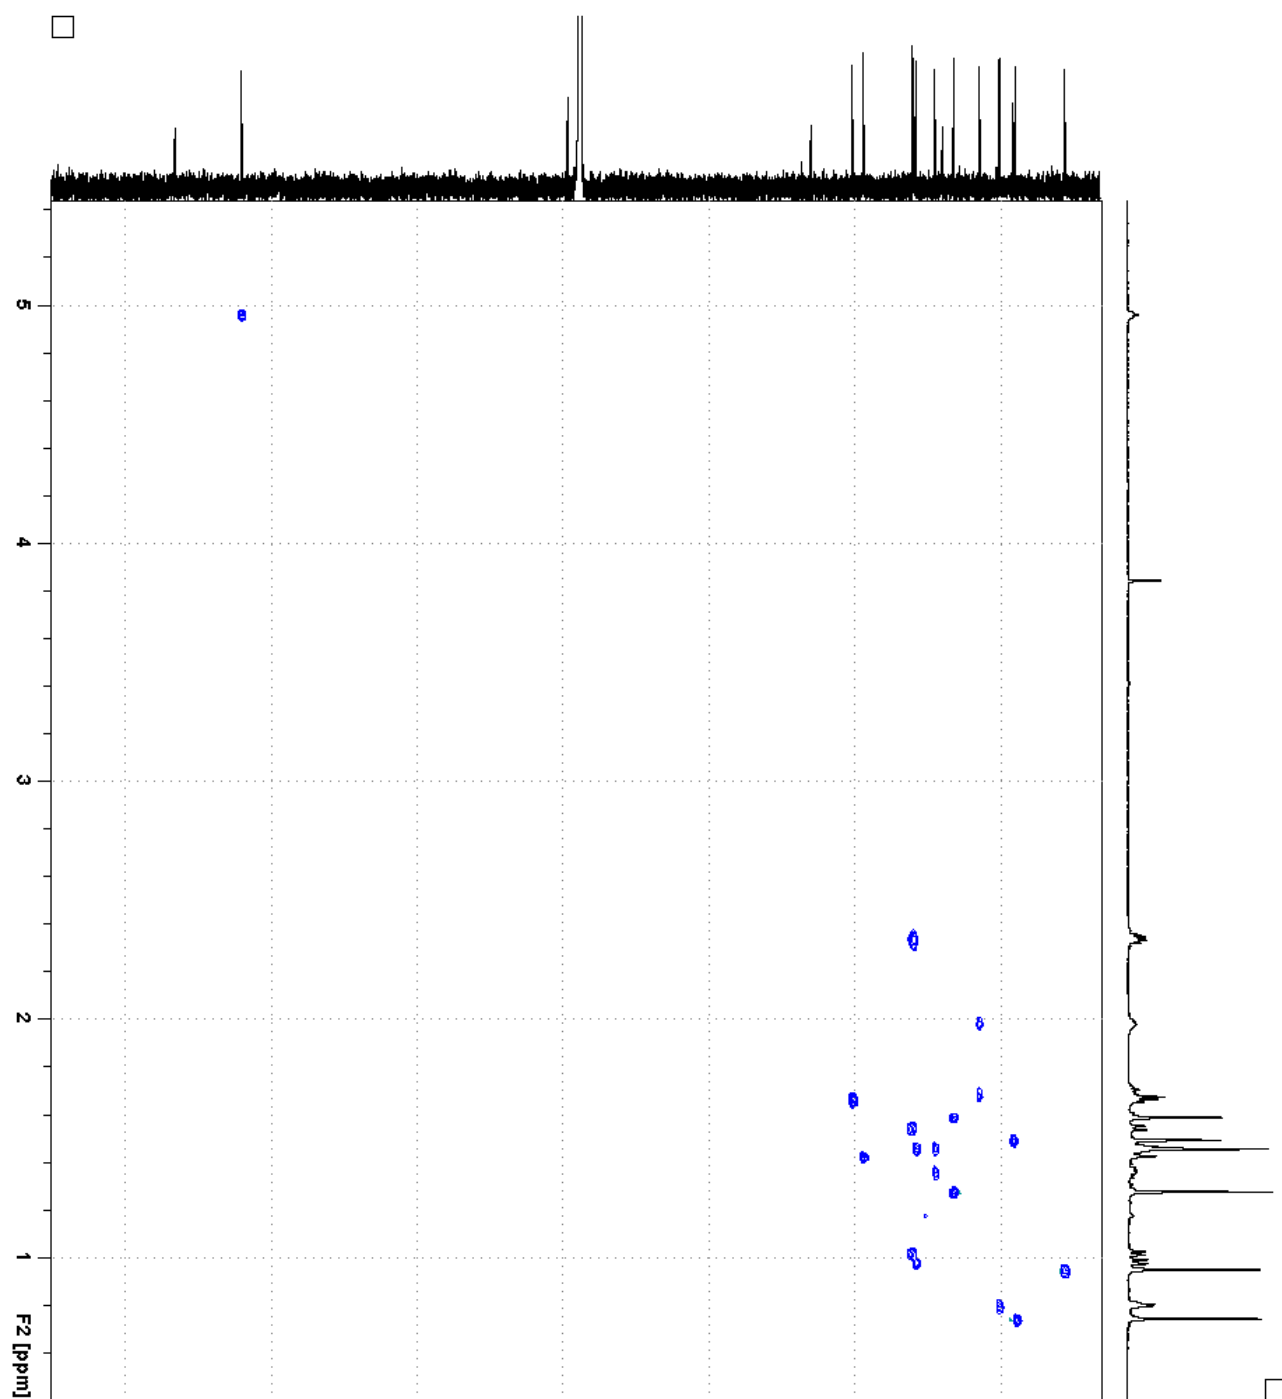

Figure S29. HMBC spectrum of 4.

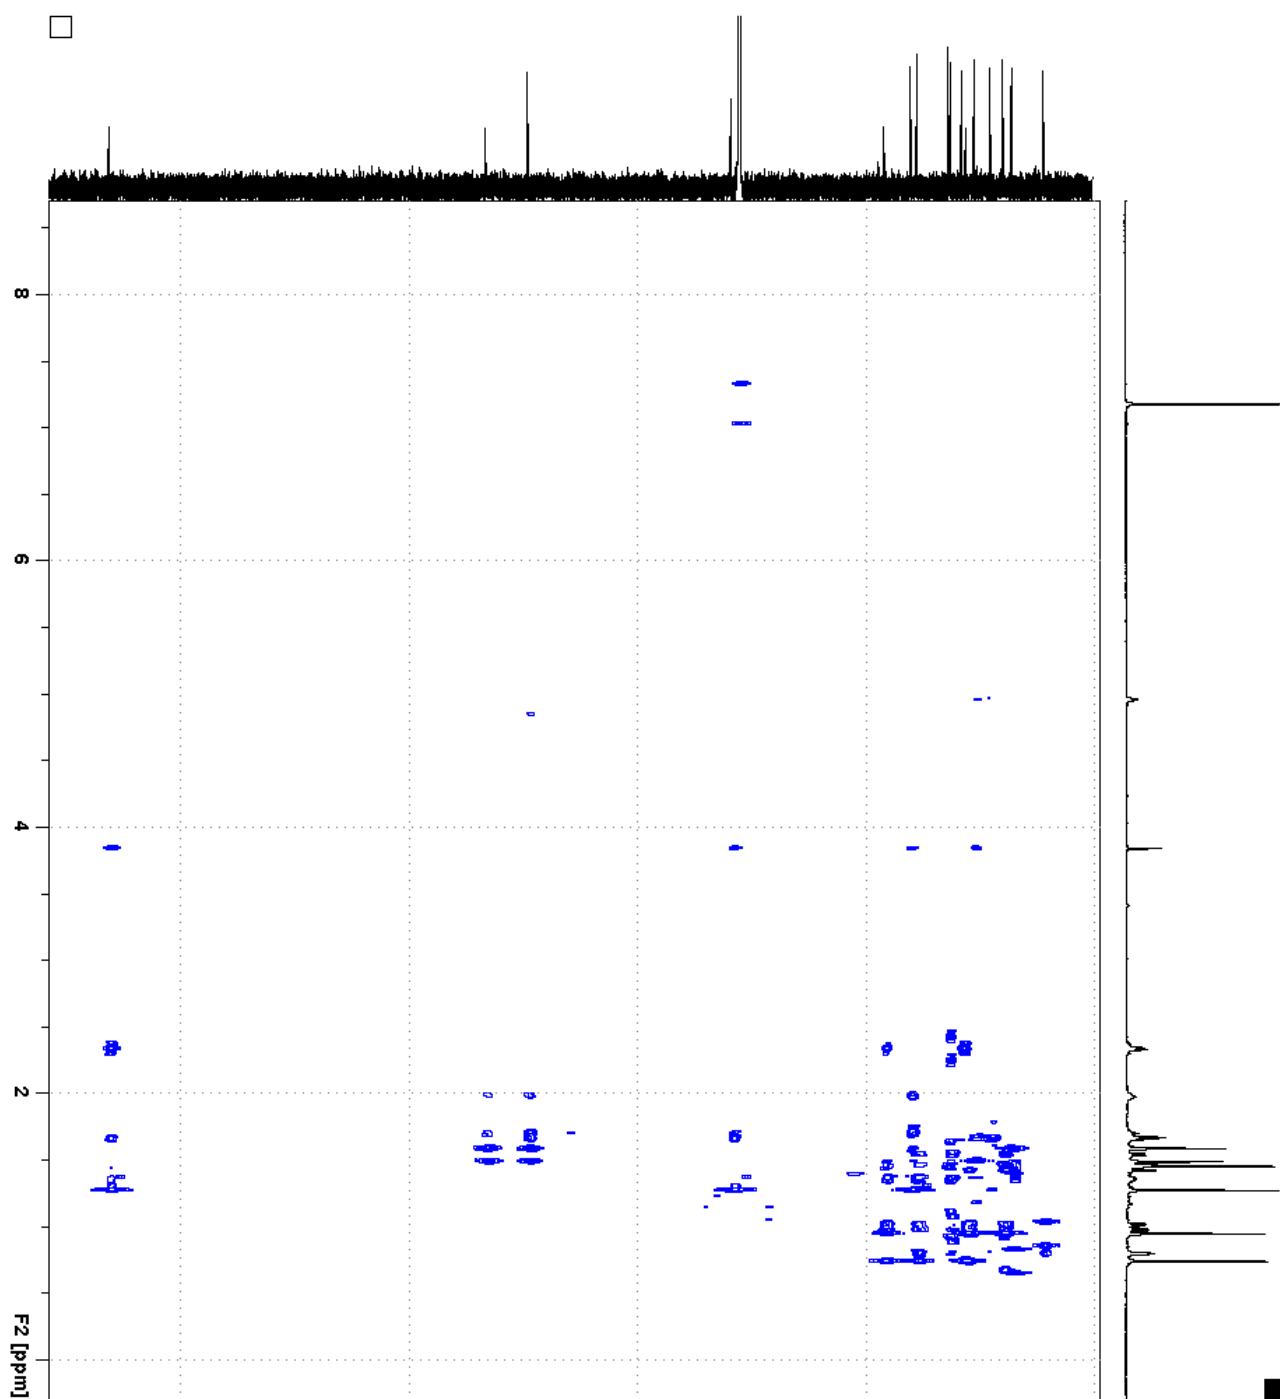

Figure S30. GC-MS chromatogram (extracted ions,  $m/z = 138 + 203 + 222$ ) demonstrating the production of lycosantalol (**4**), along with **3** from lycosantalene (**2**), in *E. coli* engineered to express SICPT2, SITPS21 and CYP71D51 (along with a plant CYP reductase). Mass spectra for NNOH and **2** - **4** can be found in Figures S3, S12, S18 & S24, respectively.

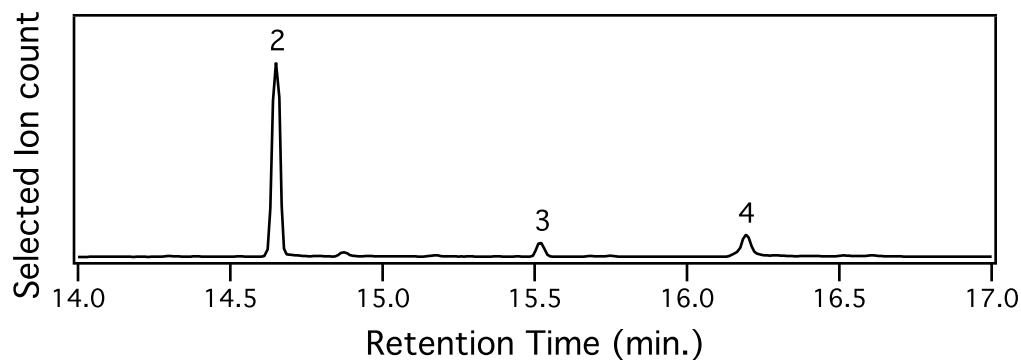

Figure S31. GC-MS chromatograms of in vitro assays of CYP71D51 with either A) purified **2** or B) **3**.

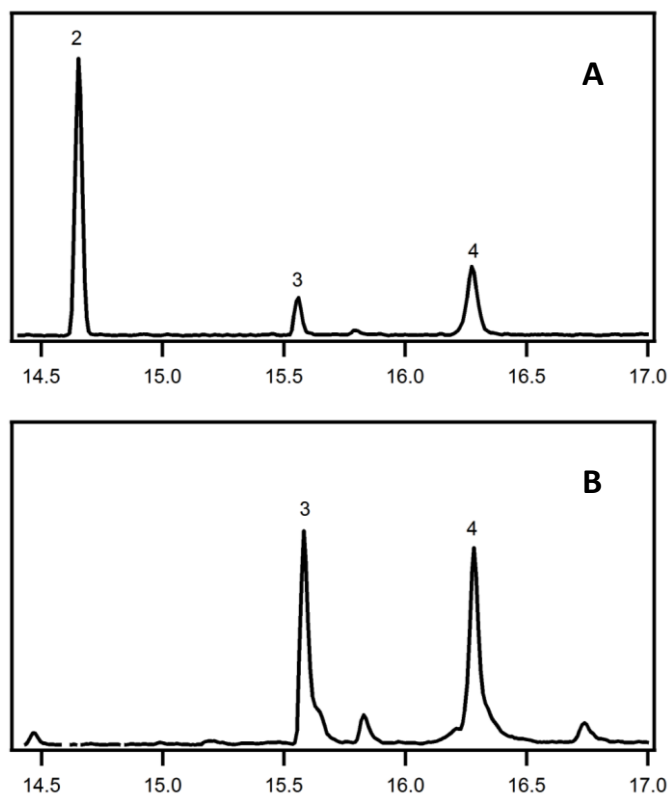

Figure S32. EIMS fragmentation of **4**. Accurate mass measurements for each fragment (A, B, C or D) can be found in Figure S24.

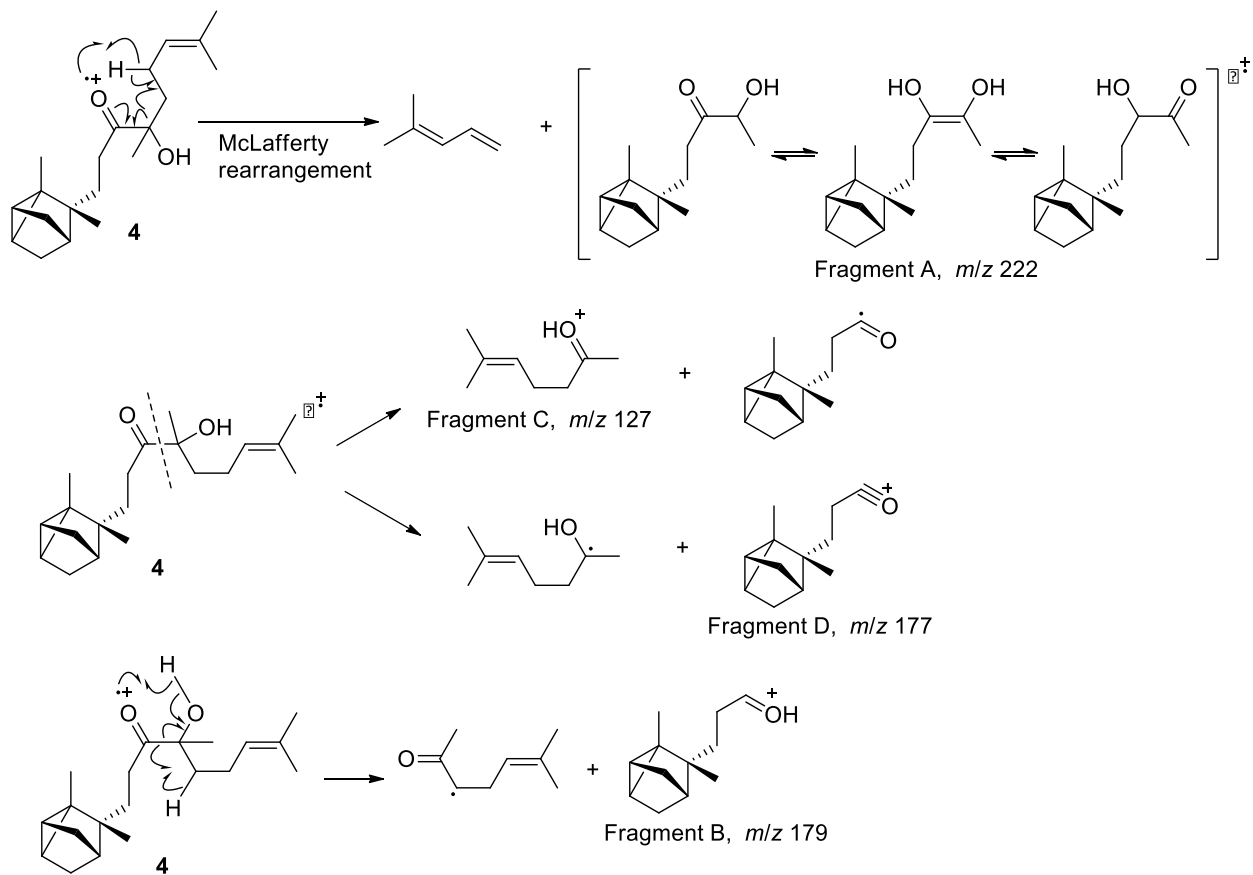

Figure S33. Comparison of the MS spectrum profiles of non-labeled, mono- $^{18}\text{O}$  labeled and di- $^{18}\text{O}$  labeled **4**. A) The MS spectrum of non-labeled **4**; and the MS spectra of **4** obtained from in vitro reaction of CYP71D51 with either B) **3** or C) **2**, respectively, under  $^{18}\text{O}_2$ .

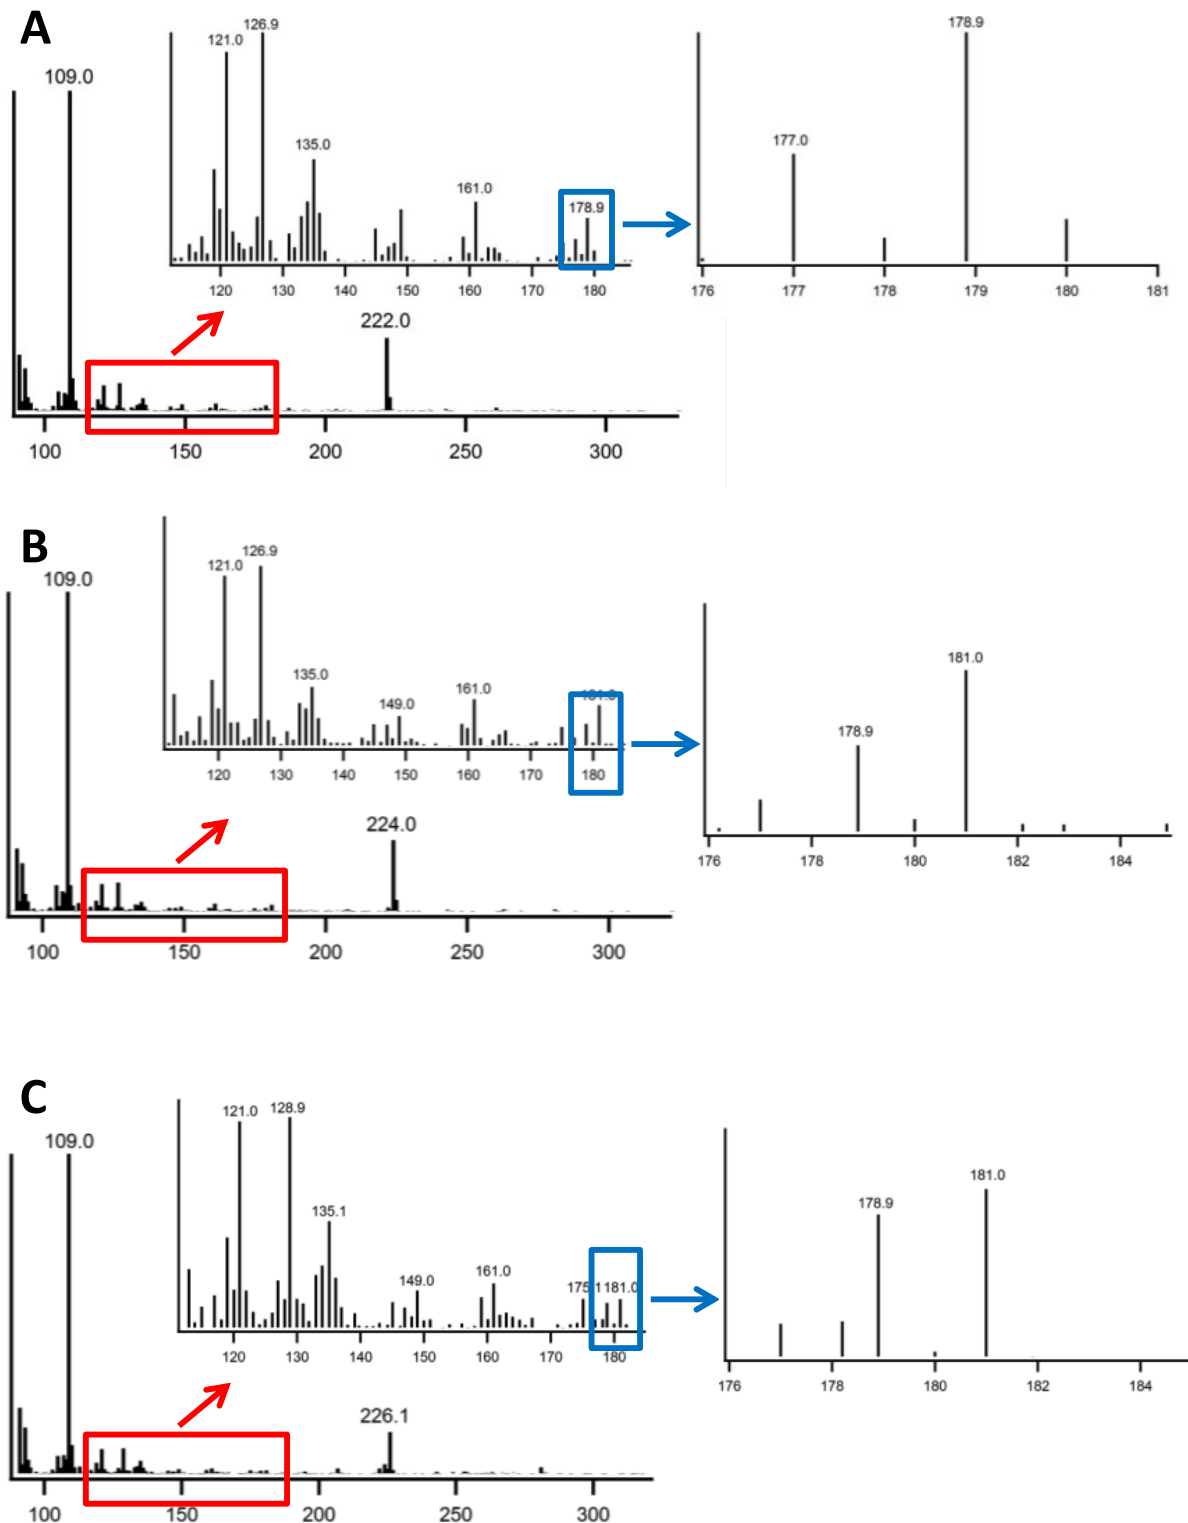



Figure S34. Comparison of MS for **4** after incubation in unlabeled or  $^{18}\text{O}$ -labeled water (with 10 mM HCl). A) Control incubation of **4** in unlabeled water. B) **4**, C) 17, D) 22 hour incubation of **4** in  $^{18}\text{O}$ -labeled water.

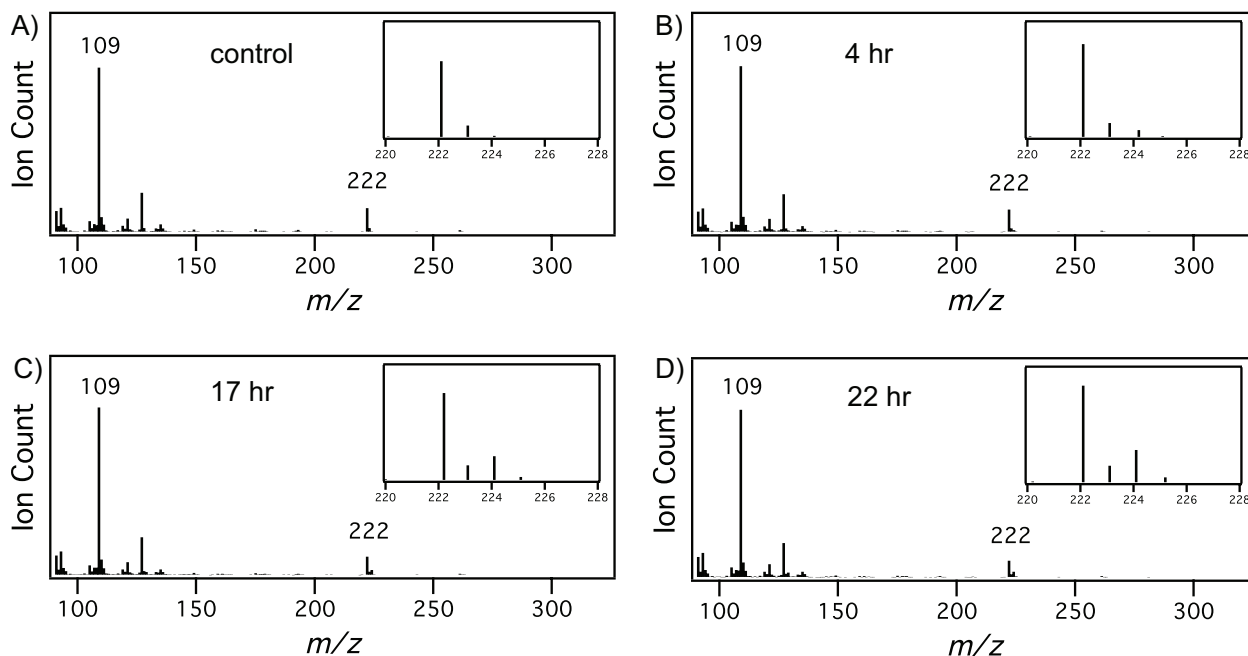

## References

- (1) Morrone, D.; Lowry, L.; Determan, M. K.; Hershey, D. M.; Xu, M.; Peters, R. J. *Appl. Microbiol. Biotechnol.* **2010**, *85*, 1893.
- (2) Cyr, A.; Wilderman, P. R.; Determan, M.; Peters, R. J. *J. Am. Chem. Soc.* **2007**, *129*, 6684.
- (3) Matsuba, Y.; Nguyen, T. T.; Wiegert, K.; Falara, V.; Gonzales-Vigil, E.; Leong, B.; Schafer, P.; Kudrna, D.; Wing, R. A.; Bolger, A. M.; Usadel, B.; Tissier, A.; Fernie, A. R.; Barry, C. S.; Pichersky, E. *Plant Cell* **2013**, *25*, 2022.
- (4) Zi, J.; Peters, R. J. *Org. Biomol. Chem.* **2013**, *11*, 7650.
- (5) Morrone, D.; Chen, X.; Coates, R. M.; Peters, R. J. *Biochem. J.* **2010**, *431*, 337.
- (6) Arcamone, F.; Cassinelli, G.; Fantini, G.; Grein, A.; Orezzi, P.; Pol, C.; Spalla, C. *Biotechnology and Bioengineering* **1969**, *11*, 1101.
- (7) Berlin, Y. A.; Kiseleva, O. A.; Kolosov, M. N.; Shemyakin, M. M.; Soifer, V. S.; Vasina, I. V.; Yartseva, I. V.; Kuznetsov, V. D. *Nature* **1968**, *218*, 193.
- (8) Chen, C.-H.; Lo, W.-L.; Liu, Y.-C.; Chen, C.-Y. *Journal of Natural Products* **2006**, *69*, 927.
- (9) Lang, T.; Toller, W.; Gütl, M.; Mahla, E.; Metzler, H.; Rehak, P.; März, W.; Halwachs-Baumann, G. *Journal of Thrombosis and Haemostasis* **2004**, *2*, 147.
- (10) Szczebara, F. M.; Chandelier, C.; Villeret, C.; Masurel, A.; Bourot, S.; Duport, C.; Blanchard, S.; Groisillier, A.; Testet, E.; Costaglioli, P.; Cauet, G.; Degryse, E.; Balbuena, D.; Winter, J.; Achstetter, T.; Spagnoli, R.; Pompon, D.; Dumas, B. *Nat. Biotechnol.* **2003**, *21*, 143.
- (11) Uchida, R.; Shiomi, K.; Inokoshi, J.; Masuma, R.; Kawakubo, T.; Tanaka, H.; Iwai, Y.; Omura, S. *J. Antibiot.* **1996**, *49*, 932.

- (12) Udagawa, T.; Yuan, J.; Panigrahy, D.; Chang, Y.-H.; Shah, J.; D'amato, R. J. *J. Pharm. Exp. Ther.* **2000**, *294*, 421.
- (13) Bonini, C.; Chiummiento, L.; Funicello, M.; Lupattelli, P.; Pullez, M. *Eur. J. Org. Chem.* **2006**, *2006*, 80.
- (14) Faraldos, J. A.; Coates, R. M.; Giner, J.-L. *J. Org. Chem.* **2013**, *78*, 10548.
- (15) Ghosh, N.; Nayak, S.; Sahoo, A. K. *J. Org. Chem.* **2011**, *76*, 500.
- (16) Hoyos, P.; Sinisterra, J.-V.; Molinari, F.; Alcantara, A. R.; Dominguez de Maria, P. *Acc. Chem. Res.* **2010**, *43*, 288.
- (17) Kano, T.; Mii, H.; Maruoka, K. *J. Am. Chem. Soc.* **2009**, *131*, 3450.
- (18) Linghu, X.; Potnick, J. R.; Johnson, J. S. *J. Am. Chem. Soc.* **2004**, *126*, 3070.
- (19) Vamos, M.; Kobayashi, Y. *J. Org. Chem.* **2008**, *73*, 3938.
- (20) Cohn, M.; Urey, H. C. *J. Am. Chem. Soc.* **1938**, *60*, 679.
- (21) Gaussian 09, Revision B.01, M. J. Frisch, G. W. Trucks, H. B. Schlegel, G. E. Scuseria, M. A. Robb, J. R. Cheeseman, G. Scalmani, V. Barone, B. Mennucci, G. A. Petersson, H. Nakatsuji, M. Caricato, X. Li, H. P. Hratchian, A. F. Izmaylov, J. Bloino, G. Zheng, J. L. Sonnenberg, M. Hada, M. Ehara, K. Toyota, R. Fukuda, J. Hasegawa, M. Ishida, T. Nakajima, Y. Honda, O. Kitao, H. Nakai, T. Vreven, J. A. Montgomery, Jr., J. E. Peralta, F. Ogliaro, M. Bearpark, J. J. Heyd, E. Brothers, K. N. Kudin, V. N. Staroverov, T. Keith, R. Kobayashi, J. Normand, K. Raghavachari, A. Rendell, J. C. Burant, S. S. Iyengar, J. Tomasi, M. Cossi, N. Rega, J. M. Millam, M. Klene, J. E. Knox, J. B. Cross, V. Bakken, C. Adamo, J. Jaramillo, R. Gomperts, R. E. Stratmann, O. Yazyev, A. J. Austin, R. Cammi, C. Pomelli, J. W. Ochterski, R. L. Martin, K. Morokuma, V. G. Zakrzewski, G. A. Voth, P. Salvador, J. J. Dannenberg, S. Dapprich, A. D. Daniels, O. Farkas, J. B. Foresman, J. V. Ortiz, J. Cioslowski, and D. J. Fox, Gaussian, Inc., Wallingford CT, 2010.
- (22) (a) A. D. Becke, *J. Chem. Phys.* **1993**, *98*, 1372-1377. (b) A. D. Becke, *J. Chem. Phys.* **1993**, *98*, 5648-5652. (c) C. Lee, W. Yang, R. G. Parr, *Phys. Rev. B* **1988**, *37*, 785-789. (d) P. J. Stephens, F. J. Devlin, C. F. Chabalowski, M. J. Frisch, *J. Phys. Chem.* **1994**, *98*, 11623-11627. (e) J. Tirado-Rives, W. L. Jorgensen, *J. Chem. Theory Comput.* **2008**, *4*, 297-306.
- (23) (a) C. Gonzalez, H. B. Schlegel, *J. Phys. Chem.* **1990**, *94*, 5523-5527. (b) K. Fukui, *Acc. Chem. Res.* **1981**, *14*, 363-368.
- (24) S. P. T. Matsuda, W. K. Wilson, Q. Xiong, *Org. Biomol. Chem.* **2006**, *4*, 530-543.
- (25) Y. Zhao, D. G. Truhlar, *J. Phys. Chem. A* **2004**, *108*, 6908-6918.
- (26) D. J. Tantillo, *Nat. Prod. Rep.* **2011**, *28*, 1035-1053. This is part 9 of our series on theoretical studies of diterpene-forming carbocation rearrangements. For part 6 and 7, see refs. M. M. Vaughan, F. X. Webster, D. Kiemle, Y. J. Hong, D. J. Tantillo, Q. Wang, R. M. Coates, A. T. Wray, W. Askew, C. O'Donnell, J. G. Tokuhisa, W. Boland, D. Tholl, *Plant Cell*, **2013**, *25*, 1108-1125Y and Y. J. Hong, D. J. Tantillo, *Nature Chem.* **2014**, *6*, 104-111.
- (27) N. Muller, A. Falk, *Ball & Stick 4.0a12*, molecular graphics software for MacOS, Johannes Kepler University Linz, 2004.

*Coordinates and Energies*

**For Scheme S4**

**B**

B3LYP/6-31+G(d,p)//B3LYP/6-31+G(d,p):

HF = -781.7724262 hartrees (-490570.015164762 kcal/mol)

Imaginary Frequencies: none found

Zero-point correction = 0.481737 (Hartree/Particle)

mPW1PW91/6-31+G(d,p)//B3LYP/6-31+G(d,p):

HF = -781.5875346 hartrees (-490453.993836846 kcal/mol)

MPWB1K/6-31+G(d,p)//B3LYP/6-31+G(d,p):

HF = -781.301688 hartrees (-490274.62223688 kcal/mol)

Coordinates (from last standard orientation):

| -----  |        |                         |           |           |
|--------|--------|-------------------------|-----------|-----------|
| Center | Atomic | Coordinates (Angstroms) |           |           |
| Number | Number | X                       | Y         | Z         |
| -----  |        |                         |           |           |
| 1      | 6      | 4.206650                | -0.628832 | 0.804398  |
| 2      | 6      | 4.692417                | 0.219695  | -0.115530 |
| 3      | 6      | 3.936598                | 1.473089  | -0.504924 |
| 4      | 6      | 2.826107                | 1.849536  | 0.479274  |
| 5      | 6      | 1.958746                | 0.600963  | 0.935150  |
| 6      | 6      | 2.898467                | -0.460331 | 1.540783  |
| 7      | 1      | 4.638811                | 2.314702  | -0.563219 |
| 8      | 1      | 4.790180                | -1.506334 | 1.076428  |
| 9      | 1      | 3.264452                | 2.231430  | 1.407150  |
| 10     | 1      | 2.185841                | 2.638526  | 0.075301  |
| 11     | 1      | 3.097305                | -0.163499 | 2.580098  |
| 12     | 1      | 2.387805                | -1.427498 | 1.619785  |
| 13     | 1      | 3.541537                | 1.362170  | -1.526850 |
| 14     | 6      | 6.006096                | -0.008524 | -0.815743 |
| 15     | 1      | 6.712378                | 0.801160  | -0.594016 |
| 16     | 1      | 6.466424                | -0.953332 | -0.516223 |
| 17     | 1      | 5.876299                | -0.021458 | -1.905659 |
| 18     | 1      | 1.281879                | 0.997885  | 1.704961  |
| 19     | 6      | 1.107843                | 0.208025  | -0.210247 |
| 20     | 6      | -0.074445               | 1.015070  | -0.519279 |
| 21     | 1      | -0.960516               | 0.351688  | -0.366405 |
| 22     | 1      | -0.185371               | 1.907895  | 0.096196  |
| 23     | 1      | -0.132931               | 1.263198  | -1.585400 |
| 24     | 6      | 1.337526                | -0.994798 | -1.001568 |
| 25     | 1      | 1.058698                | -0.858039 | -2.049740 |
| 26     | 1      | 2.364817                | -1.350247 | -0.920825 |
| 27     | 6      | 0.374867                | -2.179331 | -0.434388 |
| 28     | 1      | 0.814138                | -3.062150 | -0.911747 |

|    |   |           |           |           |
|----|---|-----------|-----------|-----------|
| 29 | 1 | 0.527051  | -2.286268 | 0.639943  |
| 30 | 6 | -1.057217 | -2.053233 | -0.814577 |
| 31 | 6 | -2.132901 | -1.992911 | 0.008930  |
| 32 | 6 | -3.527213 | -2.007819 | -0.577965 |
| 33 | 1 | -4.030221 | -2.922173 | -0.233510 |
| 34 | 1 | -3.463527 | -2.079297 | -1.669386 |
| 35 | 6 | -2.055572 | -1.975496 | 1.513770  |
| 36 | 1 | -2.537191 | -1.076800 | 1.915022  |
| 37 | 1 | -2.604273 | -2.830624 | 1.927053  |
| 38 | 1 | -1.037901 | -2.016050 | 1.905452  |
| 39 | 1 | -1.249048 | -2.077139 | -1.887454 |
| 40 | 6 | -4.428185 | -0.801969 | -0.199761 |
| 41 | 1 | -5.413944 | -1.003386 | -0.641806 |
| 42 | 1 | -4.589516 | -0.775028 | 0.881264  |
| 43 | 6 | -3.924287 | 0.517824  | -0.719951 |
| 44 | 6 | -3.851195 | 1.699903  | -0.077443 |
| 45 | 1 | -3.649908 | 0.509859  | -1.777189 |
| 46 | 6 | -3.412727 | 2.947832  | -0.808693 |
| 47 | 1 | -2.561777 | 3.428520  | -0.306532 |
| 48 | 1 | -3.134950 | 2.741311  | -1.846433 |
| 49 | 1 | -4.218215 | 3.693111  | -0.819734 |
| 50 | 6 | -4.244922 | 1.926963  | 1.362401  |
| 51 | 1 | -3.448203 | 2.449456  | 1.907425  |
| 52 | 1 | -5.128312 | 2.576237  | 1.415665  |
| 53 | 1 | -4.481735 | 1.008235  | 1.902565  |

-----

### TS1

B3LYP/6-31+G(d,p)//B3LYP/6-31+G(d,p):

HF = -781.7387942 hartrees (-490548.910748442 kcal/mol)

Imaginary Frequencies: 1 (-301.6723 1/cm)

Zero-point correction = 0.481595 (Hartree/Particle)

mPW1PW91/6-31+G(d,p)//B3LYP/6-31+G(d,p):

HF = -781.562181 hartrees (-490438.08419931 kcal/mol)

MPWB1K/6-31+G(d,p)//B3LYP/6-31+G(d,p):

HF = -781.2818263 hartrees (-490262.158821513 kcal/mol)

Coordinates (from last standard orientation):

-----

| Center<br>Number | Atomic<br>Number | Coordinates (Angstroms) |           |           |
|------------------|------------------|-------------------------|-----------|-----------|
|                  |                  | X                       | Y         | Z         |
| 1                | 6                | 4.099576                | -0.344620 | 0.095824  |
| 2                | 6                | 3.335739                | 0.604475  | -0.612146 |
| 3                | 6                | 3.119277                | 1.894427  | 0.278869  |

-----

|    |   |           |           |           |
|----|---|-----------|-----------|-----------|
| 4  | 6 | 2.377444  | 1.466375  | 1.567158  |
| 5  | 6 | 2.143588  | -0.042894 | 1.364817  |
| 6  | 6 | 3.522914  | -0.726748 | 1.406875  |
| 7  | 1 | 4.092240  | 2.351616  | 0.474325  |
| 8  | 1 | 4.954744  | -0.871129 | -0.332255 |
| 9  | 1 | 2.970039  | 1.654565  | 2.466144  |
| 10 | 1 | 1.437737  | 2.008635  | 1.688905  |
| 11 | 1 | 4.172081  | -0.433628 | 2.246881  |
| 12 | 1 | 3.470779  | -1.822720 | 1.466094  |
| 13 | 1 | 2.548988  | 2.599490  | -0.330186 |
| 14 | 6 | 3.623901  | 0.860902  | -2.076927 |
| 15 | 1 | 4.513600  | 1.490182  | -2.189187 |
| 16 | 1 | 3.792424  | -0.066119 | -2.631795 |
| 17 | 1 | 2.792744  | 1.394841  | -2.545428 |
| 18 | 1 | 1.419911  | -0.472772 | 2.060442  |
| 19 | 6 | 1.754939  | -0.196462 | -0.138242 |
| 20 | 6 | 0.621701  | 0.661570  | -0.658953 |
| 21 | 1 | -0.319356 | 0.209995  | -0.308321 |
| 22 | 1 | 0.631165  | 1.699079  | -0.330130 |
| 23 | 1 | 0.576542  | 0.636811  | -1.751144 |
| 24 | 6 | 1.634722  | -1.626490 | -0.692317 |
| 25 | 1 | 1.520709  | -1.570620 | -1.781255 |
| 26 | 1 | 2.550709  | -2.198715 | -0.520161 |
| 27 | 6 | 0.457830  | -2.464683 | -0.108643 |
| 28 | 1 | 0.702219  | -3.507394 | -0.359848 |
| 29 | 1 | 0.472434  | -2.413287 | 0.984243  |
| 30 | 6 | -0.909512 | -2.163743 | -0.662451 |
| 31 | 6 | -2.071485 | -2.013352 | 0.004610  |
| 32 | 6 | -3.364056 | -1.814307 | -0.762022 |
| 33 | 1 | -4.022044 | -2.670732 | -0.556863 |
| 34 | 1 | -3.156000 | -1.834016 | -1.838257 |
| 35 | 6 | -2.209194 | -2.070692 | 1.506598  |
| 36 | 1 | -2.553087 | -1.108898 | 1.905608  |
| 37 | 1 | -2.965309 | -2.813265 | 1.789555  |
| 38 | 1 | -1.282981 | -2.335300 | 2.020277  |
| 39 | 1 | -0.952596 | -2.130462 | -1.752421 |
| 40 | 6 | -4.151963 | -0.523909 | -0.423154 |
| 41 | 1 | -5.088198 | -0.564920 | -0.998168 |
| 42 | 1 | -4.451526 | -0.531698 | 0.628667  |
| 43 | 6 | -3.420043 | 0.743306  | -0.779045 |
| 44 | 6 | -3.307482 | 1.877256  | -0.062120 |
| 45 | 1 | -2.975097 | 0.740609  | -1.776577 |
| 46 | 6 | -2.600692 | 3.085619  | -0.632510 |
| 47 | 1 | -1.785419 | 3.418132  | 0.025316  |
| 48 | 1 | -2.188065 | 2.888702  | -1.626589 |
| 49 | 1 | -3.289180 | 3.936342  | -0.717820 |

|    |   |           |          |          |
|----|---|-----------|----------|----------|
| 50 | 6 | -3.896511 | 2.093205 | 1.311449 |
| 51 | 1 | -3.134305 | 2.464969 | 2.008749 |
| 52 | 1 | -4.679024 | 2.862260 | 1.273305 |
| 53 | 1 | -4.341039 | 1.194038 | 1.741889 |

---

## E

B3LYP/6-31+G(d,p)//B3LYP/6-31+G(d,p):

HF = -781.7690635 hartrees (-490567.905036885 kcal/mol)

Imaginary Frequencies: none found

Zero-point correction = 0.483589 (Hartree/Particle)

mPW1PW91/6-31+G(d,p)//B3LYP/6-31+G(d,p):

HF = -781.5948642 hartrees (-490458.593234142 kcal/mol)

MPWB1K/6-31+G(d,p)//B3LYP/6-31+G(d,p):

HF = -781.3171383 hartrees (-490284.317454633 kcal/mol)

Coordinates (from last standard orientation):

---

| Center<br>Number | Atomic<br>Number | Coordinates (Angstroms) |           |           |
|------------------|------------------|-------------------------|-----------|-----------|
|                  |                  | X                       | Y         | Z         |
| 1                | 6                | 3.801664                | 0.383860  | 0.639640  |
| 2                | 6                | 3.178567                | 0.128820  | -0.645939 |
| 3                | 6                | 3.236286                | 1.916593  | 0.765833  |
| 4                | 6                | 1.765016                | 1.718274  | 1.201890  |
| 5                | 6                | 1.577598                | 0.186211  | 1.073982  |
| 6                | 6                | 2.903057                | -0.315297 | 1.680621  |
| 7                | 1                | 3.878131                | 2.366840  | 1.528550  |
| 8                | 1                | 4.887939                | 0.332965  | 0.703167  |
| 9                | 1                | 1.625076                | 2.021989  | 2.242593  |
| 10               | 1                | 1.065428                | 2.294713  | 0.595338  |
| 11               | 1                | 3.084469                | 0.059549  | 2.690808  |
| 12               | 1                | 3.029269                | -1.399725 | 1.686270  |
| 13               | 1                | 3.359949                | 2.507180  | -0.146153 |
| 14               | 6                | 3.856464                | 0.239558  | -1.948729 |
| 15               | 1                | 4.842307                | 0.702298  | -1.875438 |
| 16               | 1                | 4.001335                | -0.788702 | -2.320070 |
| 17               | 1                | 3.239364                | 0.744665  | -2.697939 |
| 18               | 1                | 0.657407                | -0.191718 | 1.516715  |
| 19               | 6                | 1.742209                | -0.196345 | -0.438835 |
| 20               | 6                | 0.767170                | 0.483545  | -1.418738 |
| 21               | 1                | -0.260839               | 0.304941  | -1.099069 |
| 22               | 1                | 0.924042                | 1.564570  | -1.465480 |
| 23               | 1                | 0.876829                | 0.084052  | -2.430431 |
| 24               | 6                | 1.735639                | -1.786615 | -0.657307 |

|    |   |           |           |           |
|----|---|-----------|-----------|-----------|
| 25 | 1 | 1.700645  | -1.943076 | -1.740754 |
| 26 | 1 | 2.676937  | -2.231704 | -0.315100 |
| 27 | 6 | 0.584348  | -2.561869 | 0.028334  |
| 28 | 1 | 0.821990  | -3.618813 | -0.168253 |
| 29 | 1 | 0.648424  | -2.444483 | 1.112365  |
| 30 | 6 | -0.799914 | -2.279735 | -0.488270 |
| 31 | 6 | -1.916652 | -2.016827 | 0.217738  |
| 32 | 6 | -3.250848 | -1.886502 | -0.492620 |
| 33 | 1 | -3.896794 | -2.711054 | -0.158503 |
| 34 | 1 | -3.105165 | -2.026325 | -1.570267 |
| 35 | 6 | -1.970563 | -1.888032 | 1.721183  |
| 36 | 1 | -2.241168 | -0.866637 | 2.015542  |
| 37 | 1 | -2.746295 | -2.545565 | 2.131843  |
| 38 | 1 | -1.031746 | -2.143587 | 2.216869  |
| 39 | 1 | -0.904048 | -2.372106 | -1.570577 |
| 40 | 6 | -4.015699 | -0.562105 | -0.253000 |
| 41 | 1 | -4.994288 | -0.667171 | -0.743174 |
| 42 | 1 | -4.231836 | -0.440305 | 0.812350  |
| 43 | 6 | -3.320472 | 0.649971  | -0.817105 |
| 44 | 6 | -3.160291 | 1.862556  | -0.255931 |
| 45 | 1 | -2.956566 | 0.523061  | -1.839343 |
| 46 | 6 | -2.505516 | 2.989979  | -1.021473 |
| 47 | 1 | -1.640853 | 3.392968  | -0.475427 |
| 48 | 1 | -2.173468 | 2.673760  | -2.014889 |
| 49 | 1 | -3.201241 | 3.828946  | -1.152023 |
| 50 | 6 | -3.644500 | 2.246564  | 1.122026  |
| 51 | 1 | -2.834728 | 2.700057  | 1.708756  |
| 52 | 1 | -4.434241 | 3.005804  | 1.050610  |
| 53 | 1 | -4.047647 | 1.406987  | 1.691318  |

-----

**For Scheme S5**

**B-PPi**

B3LYP/6-31G(d)//B3LYP/6-31G(d):

HF = -2382.0388979 hartrees (-1494753.22882123 kcal/mol)

Imaginary Frequencies: none found

Zero-point correction = 0.565298 (Hartree/Particle)

mPW1PW91/6-31G(d)//B3LYP/6-31G(d):

HF = -2381.6552753 hartrees (-1494512.5018035 kcal/mol)

MPWB1K/6-31G(d)//B3LYP/6-31G(d):

HF = -2381.3649083 hartrees (-1494330.29360733 kcal/mol)

Coordinates (from last standard orientation):

-----

| Center | Atomic | Coordinates (Angstroms) |
|--------|--------|-------------------------|
|--------|--------|-------------------------|

| Number | Number | X         | Y         | Z         |
|--------|--------|-----------|-----------|-----------|
| 1      | 8      | -3.391111 | -3.324621 | -1.145190 |
| 2      | 15     | -2.938782 | -2.016036 | -0.314045 |
| 3      | 8      | -3.829082 | -0.854804 | -0.563853 |
| 4      | 8      | -1.445861 | -1.658905 | -1.008154 |
| 5      | 8      | -2.605851 | -2.425796 | 1.136110  |
| 6      | 15     | -0.047023 | -2.524615 | -0.976895 |
| 7      | 8      | 0.907257  | -1.904405 | -1.938039 |
| 8      | 8      | -0.549373 | -4.012305 | -1.477508 |
| 9      | 8      | 0.330923  | -2.702275 | 0.500325  |
| 10     | 1      | -2.664473 | -3.977666 | -1.164208 |
| 11     | 1      | -0.366418 | -4.097723 | -2.428138 |
| 12     | 12     | -0.872435 | -2.196906 | 1.926401  |
| 13     | 8      | -0.487914 | -2.280373 | 3.932522  |
| 14     | 6      | -0.324823 | -1.024227 | 3.914257  |
| 15     | 1      | -0.088142 | -0.504877 | 4.855824  |
| 16     | 8      | -0.425230 | -0.350661 | 2.841038  |
| 17     | 6      | -3.115085 | 3.198928  | 0.565843  |
| 18     | 6      | -3.274236 | 3.793536  | -0.625207 |
| 19     | 6      | -2.689383 | 3.197313  | -1.888776 |
| 20     | 6      | -2.230401 | 1.746961  | -1.734162 |
| 21     | 6      | -1.457577 | 1.488000  | -0.361378 |
| 22     | 6      | -2.370679 | 1.908295  | 0.801111  |
| 23     | 1      | -3.446757 | 3.227758  | -2.685349 |
| 24     | 1      | -3.577070 | 3.648342  | 1.444571  |
| 25     | 1      | -3.078414 | 1.058208  | -1.654448 |
| 26     | 1      | -1.620960 | 1.423037  | -2.582277 |
| 27     | 1      | -3.092104 | 1.089393  | 0.927829  |
| 28     | 1      | -1.804530 | 1.952527  | 1.739583  |
| 29     | 1      | -1.869541 | 3.839609  | -2.252171 |
| 30     | 6      | -4.045967 | 5.076665  | -0.792237 |
| 31     | 1      | -3.434174 | 5.852354  | -1.274444 |
| 32     | 1      | -4.923131 | 4.926752  | -1.436512 |
| 33     | 1      | -4.394811 | 5.468071  | 0.168453  |
| 34     | 1      | -1.318733 | 0.400847  | -0.385192 |
| 35     | 6      | -0.136282 | 2.098088  | -0.486339 |
| 36     | 6      | 0.871605  | 1.466516  | -1.355866 |
| 37     | 1      | 1.816411  | 1.370479  | -0.786827 |
| 38     | 1      | 0.586003  | 0.490142  | -1.753463 |
| 39     | 1      | 1.133175  | 2.157070  | -2.172356 |
| 40     | 6      | 0.253598  | 3.300451  | 0.259322  |
| 41     | 1      | 0.896168  | 3.956557  | -0.336604 |
| 42     | 1      | -0.619635 | 3.851396  | 0.608965  |
| 43     | 6      | 1.118353  | 2.833250  | 1.533992  |
| 44     | 1      | 0.960511  | 3.649511  | 2.250071  |



|    |   |          |           |           |
|----|---|----------|-----------|-----------|
| 45 | 1 | 0.683618 | 1.935299  | 1.981112  |
| 46 | 6 | 2.575466 | 2.698533  | 1.231167  |
| 47 | 6 | 3.387182 | 1.639937  | 1.436582  |
| 48 | 6 | 4.868291 | 1.773169  | 1.144604  |
| 49 | 1 | 5.413987 | 1.728653  | 2.099738  |
| 50 | 1 | 5.068988 | 2.764496  | 0.719093  |
| 51 | 6 | 2.943167 | 0.310579  | 1.988445  |
| 52 | 1 | 3.066936 | -0.477385 | 1.235409  |
| 53 | 1 | 3.571369 | 0.027555  | 2.844037  |
| 54 | 1 | 1.901355 | 0.292170  | 2.311348  |
| 55 | 1 | 3.029612 | 3.603998  | 0.823863  |
| 56 | 6 | 5.463529 | 0.687921  | 0.211474  |
| 57 | 1 | 6.536597 | 0.912935  | 0.113657  |
| 58 | 1 | 5.407067 | -0.288961 | 0.700576  |
| 59 | 6 | 4.829660 | 0.652245  | -1.153994 |
| 60 | 6 | 4.354423 | -0.412441 | -1.823575 |
| 61 | 1 | 4.781618 | 1.622634  | -1.654590 |
| 62 | 6 | 3.765018 | -0.261921 | -3.206342 |
| 63 | 1 | 2.741308 | -0.656019 | -3.225290 |
| 64 | 1 | 3.756951 | 0.782010  | -3.539755 |
| 65 | 1 | 4.339957 | -0.844225 | -3.940429 |
| 66 | 6 | 4.349228 | -1.832242 | -1.312416 |
| 67 | 1 | 3.323234 | -2.219668 | -1.309688 |
| 68 | 1 | 4.932271 | -2.478379 | -1.983769 |
| 69 | 1 | 4.767469 | -1.938466 | -0.308358 |

---

## TS2

B3LYP/6-31G(d)//B3LYP/6-31G(d):

HF = -2382.0125236 hartrees (-1494736.67868424 kcal/mol)

Imaginary Frequencies: 1 (-12.0927 1/cm)

Zero-point correction = 0.564711 (Hartree/Particle)

mPW1PW91/6-31G(d)//B3LYP/6-31G(d):

HF = -2381.6302036 hartrees (-1494496.76906104 kcal/mol)

MPWB1K/6-31G(d)//B3LYP/6-31G(d):

HF = -2381.3409745 hartrees (-1494315.27490849 kcal/mol)

Coordinates (from last standard orientation):

---

| Center<br>Number | Atomic<br>Number | Coordinates (Angstroms) |           |           |
|------------------|------------------|-------------------------|-----------|-----------|
|                  |                  | X                       | Y         | Z         |
| 1                | 8                | -4.606665               | -3.065347 | 0.058408  |
| 2                | 15               | -3.832250               | -1.854949 | -0.689916 |
| 3                | 8                | -3.092790               | -2.328617 | -1.887113 |

|    |    |           |           |           |
|----|----|-----------|-----------|-----------|
| 4  | 8  | -2.707242 | -1.409958 | 0.469161  |
| 5  | 8  | -4.788710 | -0.650215 | -0.815069 |
| 6  | 15 | -2.941662 | -0.725661 | 1.939516  |
| 7  | 8  | -1.636055 | -0.693459 | 2.658386  |
| 8  | 8  | -4.002229 | -1.779935 | 2.642373  |
| 9  | 8  | -3.743015 | 0.564600  | 1.724818  |
| 10 | 1  | -4.817810 | -2.807632 | 0.977210  |
| 11 | 1  | -3.501547 | -2.378955 | 3.220318  |
| 12 | 12 | -4.627428 | 1.041271  | 0.072971  |
| 13 | 8  | -5.982691 | 2.579711  | -0.067848 |
| 14 | 6  | -5.087775 | 3.233635  | -0.682865 |
| 15 | 1  | -5.317451 | 4.254086  | -1.029270 |
| 16 | 8  | -3.937843 | 2.748388  | -0.910551 |
| 17 | 6  | -0.808315 | 1.418442  | -0.801618 |
| 18 | 6  | -0.764072 | 0.413894  | -1.714457 |
| 19 | 6  | -0.103834 | -0.912593 | -1.426899 |
| 20 | 6  | 0.628609  | -0.944006 | -0.073722 |
| 21 | 6  | 1.143221  | 0.465616  | 0.300748  |
| 22 | 6  | -0.072316 | 1.377860  | 0.517360  |
| 23 | 1  | -0.896517 | -1.672513 | -1.438940 |
| 24 | 1  | -1.448925 | 2.276519  | -0.996991 |
| 25 | 1  | -0.066374 | -1.232804 | 0.719394  |
| 26 | 1  | 1.436166  | -1.685118 | -0.075104 |
| 27 | 1  | -0.691126 | 0.980578  | 1.332724  |
| 28 | 1  | 0.225029  | 2.386087  | 0.828453  |
| 29 | 1  | 0.559285  | -1.174021 | -2.266714 |
| 30 | 6  | -1.495410 | 0.506410  | -3.025448 |
| 31 | 1  | -0.806514 | 0.369413  | -3.871322 |
| 32 | 1  | -2.233617 | -0.304388 | -3.081357 |
| 33 | 1  | -2.008203 | 1.465542  | -3.141037 |
| 34 | 1  | 1.744262  | 0.382267  | 1.229153  |
| 35 | 6  | 2.071788  | 1.068272  | -0.708277 |
| 36 | 6  | 2.969470  | 0.221166  | -1.505910 |
| 37 | 1  | 3.915917  | 0.159357  | -0.919440 |
| 38 | 1  | 2.613523  | -0.795309 | -1.661211 |
| 39 | 1  | 3.249442  | 0.690100  | -2.453967 |
| 40 | 6  | 2.360117  | 2.519306  | -0.735478 |
| 41 | 1  | 2.807497  | 2.810733  | -1.690180 |
| 42 | 1  | 1.462638  | 3.113434  | -0.568067 |
| 43 | 6  | 3.382551  | 2.904065  | 0.425383  |
| 44 | 1  | 3.401702  | 4.000990  | 0.395176  |
| 45 | 1  | 2.943768  | 2.621117  | 1.384729  |
| 46 | 6  | 4.773780  | 2.380305  | 0.246447  |
| 47 | 6  | 5.465205  | 1.553915  | 1.056223  |
| 48 | 6  | 6.909252  | 1.220777  | 0.738909  |
| 49 | 1  | 7.541729  | 1.618553  | 1.546427  |

|    |   |          |           |           |
|----|---|----------|-----------|-----------|
| 50 | 1 | 7.212572 | 1.741271  | -0.177826 |
| 51 | 6 | 4.925072 | 0.950539  | 2.329937  |
| 52 | 1 | 4.858828 | -0.141668 | 2.249188  |
| 53 | 1 | 5.602274 | 1.159404  | 3.168154  |
| 54 | 1 | 3.935377 | 1.321723  | 2.604945  |
| 55 | 1 | 5.287323 | 2.760365  | -0.638187 |
| 56 | 6 | 7.229666 | -0.288640 | 0.593151  |
| 57 | 1 | 8.319596 | -0.368843 | 0.465457  |
| 58 | 1 | 7.001404 | -0.810891 | 1.527085  |
| 59 | 6 | 6.557876 | -0.941927 | -0.585255 |
| 60 | 6 | 5.885489 | -2.106246 | -0.631149 |
| 61 | 1 | 6.696086 | -0.410127 | -1.529671 |
| 62 | 6 | 5.363866 | -2.645039 | -1.942967 |
| 63 | 1 | 4.283574 | -2.841340 | -1.895829 |
| 64 | 1 | 5.555205 | -1.960835 | -2.775854 |
| 65 | 1 | 5.836509 | -3.607290 | -2.183153 |
| 66 | 6 | 5.626163 | -3.003504 | 0.554883  |
| 67 | 1 | 4.554227 | -3.223560 | 0.649906  |
| 68 | 1 | 6.126396 | -3.971981 | 0.418373  |
| 69 | 1 | 5.971068 | -2.585202 | 1.503272  |

-----

C-PPi

B3LYP/6-31G(d)//B3LYP/6-31G(d):

HF = -2382.026676 hartrees (-1494745.55945676 kcal/mol)

Imaginary Frequencies: none found

Zero-point correction = 0.565883 (Hartree/Particle)

mPW1PW91/6-31G(d)//B3LYP/6-31G(d):

HF = -2381.6530376 hartrees (-1494511.09762438 kcal/mol)

MPWB1K/6-31G(d)//B3LYP/6-31G(d):

HF = -2381.3676604 hartrees (-1494332.0205776 kcal/mol)

Coordinates (from last standard orientation):

-----

| Center<br>Number | Atomic<br>Number | Coordinates (Angstroms) |           |           |
|------------------|------------------|-------------------------|-----------|-----------|
|                  |                  | X                       | Y         | Z         |
| 1                | 8                | -5.550677               | -1.955738 | -1.113976 |
| 2                | 15               | -4.296853               | -0.972462 | -1.371230 |
| 3                | 8                | -3.521969               | -1.386436 | -2.574619 |
| 4                | 8                | -3.318930               | -1.275704 | -0.045091 |
| 5                | 8                | -4.748311               | 0.490604  | -1.218991 |
| 6                | 15               | -3.627804               | -0.975398 | 1.546102  |
| 7                | 8                | -2.536644               | -1.614432 | 2.338076  |
| 8                | 8                | -5.076217               | -1.720109 | 1.771215  |

|    |    |           |           |           |
|----|----|-----------|-----------|-----------|
| 9  | 8  | -3.918596 | 0.522833  | 1.666122  |
| 10 | 1  | -5.889947 | -1.847881 | -0.204243 |
| 11 | 1  | -4.925097 | -2.598418 | 2.158733  |
| 12 | 12 | -4.115106 | 1.700426  | 0.138997  |
| 13 | 8  | -4.495855 | 3.701904  | 0.268021  |
| 14 | 6  | -3.284522 | 3.900390  | -0.053741 |
| 15 | 1  | -2.920286 | 4.935930  | -0.138961 |
| 16 | 8  | -2.484892 | 2.940938  | -0.278705 |
| 17 | 6  | -0.226294 | 0.276496  | -0.546516 |
| 18 | 6  | -0.306531 | -1.155643 | -0.724326 |
| 19 | 6  | 0.004417  | -1.975305 | 0.462259  |
| 20 | 6  | 1.069539  | -1.302353 | 1.393375  |
| 21 | 6  | 1.156716  | 0.204138  | 1.113854  |
| 22 | 6  | -0.287884 | 0.726198  | 0.935526  |
| 23 | 1  | -0.953181 | -2.011542 | 1.028834  |
| 24 | 1  | -0.700284 | 0.869164  | -1.330728 |
| 25 | 1  | 0.775790  | -1.464426 | 2.434502  |
| 26 | 1  | 2.041123  | -1.786442 | 1.244848  |
| 27 | 1  | -1.051717 | 0.260554  | 1.559820  |
| 28 | 1  | -0.386569 | 1.808626  | 0.998758  |
| 29 | 1  | 0.256552  | -3.005022 | 0.194173  |
| 30 | 6  | -0.626440 | -1.734722 | -2.021548 |
| 31 | 1  | -1.749873 | -1.709674 | -2.131745 |
| 32 | 1  | -0.285597 | -1.101646 | -2.848761 |
| 33 | 1  | -0.292184 | -2.767910 | -2.138157 |
| 34 | 1  | 1.810269  | 0.701208  | 1.837191  |
| 35 | 6  | 1.437333  | 0.491943  | -0.394201 |
| 36 | 6  | 2.392880  | -0.413904 | -1.170021 |
| 37 | 1  | 3.423415  | -0.178046 | -0.885088 |
| 38 | 1  | 2.237985  | -1.481603 | -0.990770 |
| 39 | 1  | 2.302911  | -0.240751 | -2.249056 |
| 40 | 6  | 1.701626  | 1.978056  | -0.739978 |
| 41 | 1  | 1.797451  | 2.057605  | -1.831253 |
| 42 | 1  | 0.833508  | 2.586356  | -0.472430 |
| 43 | 6  | 2.940998  | 2.630971  | -0.074351 |
| 44 | 1  | 2.832172  | 3.711959  | -0.254188 |
| 45 | 1  | 2.882146  | 2.507860  | 1.011469  |
| 46 | 6  | 4.284008  | 2.205465  | -0.609698 |
| 47 | 6  | 5.400731  | 1.892338  | 0.068976  |
| 48 | 6  | 6.687053  | 1.595341  | -0.678672 |
| 49 | 1  | 7.421811  | 2.380543  | -0.441982 |
| 50 | 1  | 6.503769  | 1.660768  | -1.758669 |
| 51 | 6  | 5.505460  | 1.862334  | 1.575174  |
| 52 | 1  | 5.726240  | 0.849811  | 1.936850  |
| 53 | 1  | 6.330302  | 2.502898  | 1.916165  |
| 54 | 1  | 4.596712  | 2.201790  | 2.077022  |

|    |   |          |           |           |
|----|---|----------|-----------|-----------|
| 55 | 1 | 4.349266 | 2.212042  | -1.700007 |
| 56 | 6 | 7.349268 | 0.230310  | -0.363722 |
| 57 | 1 | 8.293531 | 0.193830  | -0.928202 |
| 58 | 1 | 7.632968 | 0.189250  | 0.692566  |
| 59 | 6 | 6.502019 | -0.952019 | -0.751947 |
| 60 | 6 | 6.176992 | -2.031540 | -0.021994 |
| 61 | 1 | 6.129822 | -0.916410 | -1.778354 |
| 62 | 6 | 5.335825 | -3.139006 | -0.613052 |
| 63 | 1 | 4.421314 | -3.301197 | -0.023995 |
| 64 | 1 | 5.043191 | -2.925059 | -1.645909 |
| 65 | 1 | 5.878369 | -4.094836 | -0.605740 |
| 66 | 6 | 6.611025 | -2.277330 | 1.403135  |
| 67 | 1 | 5.739930 | -2.441346 | 2.052827  |
| 68 | 1 | 7.219344 | -3.190164 | 1.468927  |
| 69 | 1 | 7.197373 | -1.458841 | 1.826909  |

---

### TS3

B3LYP/6-31G(d)//B3LYP/6-31G(d):

HF = -2382.0101636 hartrees (-1494735.19776064 kcal/mol)

Imaginary Frequencies: 1 (-213.2701 1/cm)

Zero-point correction = 0.566190 (Hartree/Particle)

mPW1PW91/6-31G(d)//B3LYP/6-31G(d):

HF = -2381.6353108 hartrees (-1494499.97388011 kcal/mol)

MPWB1K/6-31G(d)//B3LYP/6-31G(d):

HF = -2381.3498872 hartrees (-1494320.86771687 kcal/mol)

Coordinates (from last standard orientation):

---

| Center<br>Number | Atomic<br>Number | Coordinates (Angstroms) |           |           |
|------------------|------------------|-------------------------|-----------|-----------|
|                  |                  | X                       | Y         | Z         |
| 1                | 8                | -4.959442               | -2.625601 | -0.683828 |
| 2                | 15               | -3.937010               | -1.442221 | -1.083140 |
| 3                | 8                | -2.852865               | -1.931580 | -1.971500 |
| 4                | 8                | -3.232797               | -1.059207 | 0.401920  |
| 5                | 8                | -4.734956               | -0.177833 | -1.464090 |
| 6                | 15               | -3.969348               | -0.503867 | 1.774529  |
| 7                | 8                | -2.994093               | -0.609725 | 2.894128  |
| 8                | 8                | -5.221101               | -1.562083 | 1.955111  |
| 9                | 8                | -4.624246               | 0.830541  | 1.397673  |
| 10               | 1                | -5.465967               | -2.383562 | 0.117577  |
| 11               | 1                | -4.969293               | -2.230220 | 2.614376  |
| 12               | 12               | -4.592295               | 1.441975  | -0.438322 |
| 13               | 8                | -5.044771               | 3.329387  | -1.073970 |

|    |   |           |           |           |
|----|---|-----------|-----------|-----------|
| 14 | 6 | -3.799907 | 3.546431  | -1.175245 |
| 15 | 1 | -3.458646 | 4.532038  | -1.527765 |
| 16 | 8 | -2.939626 | 2.660252  | -0.882265 |
| 17 | 6 | -0.711533 | 0.453962  | -0.089270 |
| 18 | 6 | -0.057284 | -0.455082 | -0.935987 |
| 19 | 6 | 0.092153  | -1.880680 | -0.377095 |
| 20 | 6 | 0.763716  | -1.805979 | 1.020345  |
| 21 | 6 | 1.003640  | -0.308388 | 1.265252  |
| 22 | 6 | -0.372019 | 0.382750  | 1.360939  |
| 23 | 1 | -0.915601 | -2.301981 | -0.349147 |
| 24 | 1 | -1.273436 | 1.295585  | -0.498831 |
| 25 | 1 | 0.122392  | -2.220189 | 1.802798  |
| 26 | 1 | 1.703422  | -2.367053 | 1.040494  |
| 27 | 1 | -1.136915 | -0.154488 | 1.947997  |
| 28 | 1 | -0.329567 | 1.391708  | 1.784784  |
| 29 | 1 | 0.665795  | -2.483515 | -1.086306 |
| 30 | 6 | -0.177630 | -0.309466 | -2.431352 |
| 31 | 1 | -1.077573 | -0.852851 | -2.745268 |
| 32 | 1 | -0.273529 | 0.737402  | -2.737267 |
| 33 | 1 | 0.686424  | -0.750519 | -2.939636 |
| 34 | 1 | 1.665938  | -0.116833 | 2.115450  |
| 35 | 6 | 1.519227  | 0.279401  | -0.082759 |
| 36 | 6 | 2.648558  | -0.429810 | -0.805004 |
| 37 | 1 | 3.582901  | -0.212914 | -0.269807 |
| 38 | 1 | 2.537582  | -1.511834 | -0.860774 |
| 39 | 1 | 2.774698  | -0.038034 | -1.818843 |
| 40 | 6 | 1.706540  | 1.806169  | -0.159679 |
| 41 | 1 | 1.827099  | 2.092855  | -1.212033 |
| 42 | 1 | 0.820132  | 2.333125  | 0.197277  |
| 43 | 6 | 2.911062  | 2.359871  | 0.656973  |
| 44 | 1 | 2.702901  | 3.432880  | 0.786376  |
| 45 | 1 | 2.896216  | 1.935006  | 1.665865  |
| 46 | 6 | 4.266570  | 2.223680  | 0.012845  |
| 47 | 6 | 5.437852  | 1.889601  | 0.580364  |
| 48 | 6 | 6.711508  | 1.908197  | -0.243230 |
| 49 | 1 | 7.386409  | 2.675836  | 0.165454  |
| 50 | 1 | 6.476242  | 2.218522  | -1.269072 |
| 51 | 6 | 5.610867  | 1.526921  | 2.035889  |
| 52 | 1 | 5.958334  | 0.491794  | 2.146808  |
| 53 | 1 | 6.374668  | 2.164389  | 2.501497  |
| 54 | 1 | 4.693858  | 1.633602  | 2.619736  |
| 55 | 1 | 4.283201  | 2.488103  | -1.046546 |
| 56 | 6 | 7.495836  | 0.573000  | -0.290914 |
| 57 | 1 | 8.410245  | 0.758809  | -0.874826 |
| 58 | 1 | 7.835686  | 0.304039  | 0.714157  |
| 59 | 6 | 6.725392  | -0.551122 | -0.931214 |

|    |   |          |           |           |
|----|---|----------|-----------|-----------|
| 60 | 6 | 6.552036 | -1.809310 | -0.494045 |
| 61 | 1 | 6.277698 | -0.293393 | -1.893711 |
| 62 | 6 | 5.772963 | -2.812230 | -1.313184 |
| 63 | 1 | 4.918363 | -3.209968 | -0.747238 |
| 64 | 1 | 5.394297 | -2.377396 | -2.243740 |
| 65 | 1 | 6.396943 | -3.678200 | -1.574875 |
| 66 | 6 | 7.112603 | -2.363404 | 0.793854  |
| 67 | 1 | 6.314044 | -2.796555 | 1.411925  |
| 68 | 1 | 7.817709 | -3.180271 | 0.586308  |
| 69 | 1 | 7.638509 | -1.618583 | 1.395505  |

E-PPi

B3LYP/6-31G(d)//B3LYP/6-31G(d):

HF = -2382.0296908 hartrees (-1494747.45127391 kcal/mol)

Imaginary Frequencies: none found

Zero-point correction = 0.566684 (Hartree/Particle)

mPW1PW91/6-31G(d)//B3LYP/6-31G(d):

HF = -2381.6595214 hartrees (-1494515.16627371 kcal/mol)

MPWB1K/6-31G(d)//B3LYP/6-31G(d):

HF = -2381.37619 hartrees (-1494337.3729869 kcal/mol)

Coordinates (from last standard orientation):

| Center<br>Number | Atomic<br>Number | Coordinates (Angstroms) |           |           |
|------------------|------------------|-------------------------|-----------|-----------|
|                  |                  | X                       | Y         | Z         |
| 1                | 6                | 0.631921                | 0.924151  | 0.808840  |
| 2                | 6                | -0.435821               | 1.407698  | 1.595303  |
| 3                | 6                | 0.167273                | -0.510225 | 1.644023  |
| 4                | 6                | -0.848980               | -1.133225 | 0.685299  |
| 5                | 6                | -1.273197               | 0.092766  | -0.155069 |
| 6                | 6                | 0.107754                | 0.620836  | -0.592922 |
| 7                | 1                | 1.186930                | -0.941320 | 1.743696  |
| 8                | 1                | 1.662998                | 1.192941  | 1.016678  |
| 9                | 1                | -0.362136               | -1.876444 | 0.048348  |
| 10               | 1                | -1.675503               | -1.616914 | 1.210953  |
| 11               | 1                | 0.705506                | -0.114060 | -1.135502 |
| 12               | 1                | 0.070574                | 1.539205  | -1.187553 |
| 13               | 1                | -0.183816               | -0.418015 | 2.677625  |
| 14               | 6                | -0.287990               | 2.146029  | 2.881847  |
| 15               | 1                | -1.047327               | 1.866557  | 3.617833  |
| 16               | 1                | 0.710375                | 2.024128  | 3.309206  |
| 17               | 1                | -0.426873               | 3.213534  | 2.659276  |
| 18               | 1                | -1.986086               | -0.123508 | -0.950723 |

|    |    |           |           |           |
|----|----|-----------|-----------|-----------|
| 19 | 6  | -1.754047 | 1.186509  | 0.860365  |
| 20 | 6  | -2.913630 | 0.761279  | 1.777138  |
| 21 | 1  | -3.774858 | 0.451476  | 1.179989  |
| 22 | 1  | -2.641926 | -0.071342 | 2.433328  |
| 23 | 1  | -3.233760 | 1.592483  | 2.415036  |
| 24 | 6  | -2.073832 | 2.562969  | 0.169117  |
| 25 | 1  | -2.515957 | 3.218555  | 0.930452  |
| 26 | 1  | -1.141297 | 3.050590  | -0.138267 |
| 27 | 8  | 4.520450  | -2.886467 | 0.965455  |
| 28 | 15 | 3.831536  | -1.438510 | 1.148603  |
| 29 | 8  | 2.913584  | -1.409922 | 2.324177  |
| 30 | 8  | 2.871988  | -1.315532 | -0.211469 |
| 31 | 8  | 4.897756  | -0.335970 | 1.002135  |
| 32 | 15 | 3.324919  | -1.239757 | -1.802019 |
| 33 | 8  | 2.109278  | -1.411386 | -2.637443 |
| 34 | 8  | 4.341465  | -2.537554 | -1.913175 |
| 35 | 8  | 4.230178  | -0.007397 | -1.928588 |
| 36 | 1  | 4.856320  | -2.979121 | 0.050865  |
| 37 | 1  | 3.860283  | -3.264414 | -2.342388 |
| 38 | 12 | 4.758297  | 1.007330  | -0.372815 |
| 39 | 8  | 5.699198  | 2.817584  | -0.368145 |
| 40 | 6  | 4.592801  | 3.335762  | -0.023876 |
| 41 | 1  | 4.546421  | 4.424264  | 0.138312  |
| 42 | 8  | 3.545000  | 2.640025  | 0.137096  |
| 43 | 6  | -2.996918 | 2.531042  | -1.071530 |
| 44 | 1  | -2.985636 | 3.557760  | -1.469721 |
| 45 | 1  | -2.543862 | 1.909839  | -1.848974 |
| 46 | 6  | -4.429644 | 2.143434  | -0.812220 |
| 47 | 6  | -5.195538 | 1.262876  | -1.478375 |
| 48 | 6  | -6.659852 | 1.101572  | -1.115129 |
| 49 | 1  | -7.270145 | 1.438731  | -1.967162 |
| 50 | 1  | -6.904012 | 1.768082  | -0.278166 |
| 51 | 6  | -4.721569 | 0.424695  | -2.642051 |
| 52 | 1  | -4.720756 | -0.642997 | -2.387350 |
| 53 | 1  | -5.397623 | 0.540214  | -3.499873 |
| 54 | 1  | -3.716121 | 0.684126  | -2.980739 |
| 55 | 1  | -4.902672 | 2.702617  | -0.001929 |
| 56 | 6  | -7.112342 | -0.336828 | -0.760350 |
| 57 | 1  | -8.203028 | -0.302914 | -0.615652 |
| 58 | 1  | -6.947157 | -1.000512 | -1.614763 |
| 59 | 6  | -6.473696 | -0.879457 | 0.490426  |
| 60 | 6  | -5.871838 | -2.064840 | 0.683009  |
| 61 | 1  | -6.548968 | -0.214130 | 1.353753  |
| 62 | 6  | -5.335357 | -2.447321 | 2.042854  |
| 63 | 1  | -4.262395 | -2.683413 | 1.996452  |
| 64 | 1  | -5.479118 | -1.651111 | 2.780197  |



|    |   |           |           |           |
|----|---|-----------|-----------|-----------|
| 65 | 1 | -5.830954 | -3.352307 | 2.421336  |
| 66 | 6 | -5.692519 | -3.127519 | -0.374350 |
| 67 | 1 | -4.632923 | -3.399229 | -0.477535 |
| 68 | 1 | -6.219119 | -4.048501 | -0.087978 |
| 69 | 1 | -6.060798 | -2.829067 | -1.358487 |

---

#### TS4

B3LYP/6-31G(d)//B3LYP/6-31G(d):

HF = -2382.0240166 hartrees (-1494743.89065667 kcal/mol)

Imaginary Frequencies: 1 (-433.4371 1/cm)

Zero-point correction = 0.563458 (Hartree/Particle)

mPW1PW91/6-31G(d)//B3LYP/6-31G(d):

HF = -2381.6586524 hartrees (-1494514.62096752 kcal/mol)

MPWB1K/6-31G(d)//B3LYP/6-31G(d):

HF = -2381.3747049 hartrees (-1494336.4410718 kcal/mol)

Coordinates (from last standard orientation):

---

| Center<br>Number | Atomic<br>Number | Coordinates (Angstroms) |           |           |
|------------------|------------------|-------------------------|-----------|-----------|
|                  |                  | X                       | Y         | Z         |
| 1                | 6                | 0.557569                | 0.808258  | 1.221433  |
| 2                | 6                | -0.618690               | 1.116102  | 1.971489  |
| 3                | 6                | -0.060842               | -0.474742 | 2.121068  |
| 4                | 6                | -0.958376               | -1.268673 | 1.164196  |
| 5                | 6                | -1.265176               | -0.146061 | 0.150674  |
| 6                | 6                | 0.158982                | 0.372529  | -0.179986 |
| 7                | 1                | 1.087900                | -0.892219 | 1.945026  |
| 8                | 1                | 1.561414                | 1.118799  | 1.489115  |
| 9                | 1                | -0.410538               | -2.099848 | 0.710332  |
| 10               | 1                | -1.846993               | -1.670493 | 1.653245  |
| 11               | 1                | 0.820056                | -0.398327 | -0.585893 |
| 12               | 1                | 0.182747                | 1.233492  | -0.853195 |
| 13               | 1                | -0.054890               | -0.610432 | 3.201634  |
| 14               | 6                | -0.613576               | 1.947663  | 3.228449  |
| 15               | 1                | -1.414679               | 1.650421  | 3.912597  |
| 16               | 1                | 0.341972                | 1.872870  | 3.756809  |
| 17               | 1                | -0.768091               | 3.001679  | 2.969515  |
| 18               | 1                | -1.872085               | -0.441088 | -0.705616 |
| 19               | 6                | -1.847752               | 1.002656  | 1.036586  |
| 20               | 6                | -3.138194               | 0.638783  | 1.792048  |
| 21               | 1                | -3.923939               | 0.340228  | 1.093076  |
| 22               | 1                | -2.994164               | -0.173243 | 2.510446  |
| 23               | 1                | -3.509224               | 1.503524  | 2.354015  |

|    |    |           |           |           |
|----|----|-----------|-----------|-----------|
| 24 | 6  | -2.028047 | 2.352277  | 0.275669  |
| 25 | 1  | -2.525182 | 3.060543  | 0.952144  |
| 26 | 1  | -1.045205 | 2.789361  | 0.064995  |
| 27 | 8  | 4.768381  | -2.119498 | 1.570876  |
| 28 | 15 | 3.512664  | -1.258200 | 1.072092  |
| 29 | 8  | 2.269702  | -1.713994 | 1.803323  |
| 30 | 8  | 3.353368  | -1.650491 | -0.509363 |
| 31 | 8  | 3.809534  | 0.251328  | 1.143812  |
| 32 | 15 | 4.457498  | -1.378454 | -1.735329 |
| 33 | 8  | 4.045380  | -2.107509 | -2.950716 |
| 34 | 8  | 5.808752  | -2.048959 | -1.041057 |
| 35 | 8  | 4.716535  | 0.133342  | -1.723985 |
| 36 | 1  | 5.429383  | -2.195267 | 0.846522  |
| 37 | 1  | 5.998645  | -2.884651 | -1.499864 |
| 38 | 12 | 4.164545  | 1.391630  | -0.386614 |
| 39 | 8  | 4.717363  | 3.350281  | -0.209073 |
| 40 | 6  | 3.501281  | 3.654555  | -0.405627 |
| 41 | 1  | 3.212373  | 4.716930  | -0.408456 |
| 42 | 8  | 2.612061  | 2.768957  | -0.596723 |
| 43 | 6  | -2.805158 | 2.312614  | -1.061563 |
| 44 | 1  | -2.692027 | 3.314250  | -1.505547 |
| 45 | 1  | -2.305604 | 1.627831  | -1.753675 |
| 46 | 6  | -4.278364 | 2.011095  | -0.957225 |
| 47 | 6  | -5.020542 | 1.177819  | -1.705444 |
| 48 | 6  | -6.521607 | 1.099388  | -1.499062 |
| 49 | 1  | -7.021449 | 1.479167  | -2.403794 |
| 50 | 1  | -6.813207 | 1.770615  | -0.681277 |
| 51 | 6  | -4.476175 | 0.315151  | -2.819785 |
| 52 | 1  | -4.572597 | -0.751749 | -2.579862 |
| 53 | 1  | -5.044166 | 0.479210  | -3.745739 |
| 54 | 1  | -3.424797 | 0.510584  | -3.042174 |
| 55 | 1  | -4.800274 | 2.597487  | -0.197702 |
| 56 | 6  | -7.087472 | -0.314631 | -1.216040 |
| 57 | 1  | -8.183195 | -0.219651 | -1.169411 |
| 58 | 1  | -6.882168 | -0.972986 | -2.065985 |
| 59 | 6  | -6.594631 | -0.912346 | 0.074790  |
| 60 | 6  | -6.070800 | -2.129528 | 0.294144  |
| 61 | 1  | -6.710600 | -0.258004 | 0.941844  |
| 62 | 6  | -5.667603 | -2.558393 | 1.685903  |
| 63 | 1  | -4.601529 | -2.825168 | 1.726209  |
| 64 | 1  | -5.850907 | -1.773293 | 2.426252  |
| 65 | 1  | -6.220409 | -3.455439 | 1.998499  |
| 66 | 6  | -5.851340 | -3.182413 | -0.765620 |
| 67 | 1  | -4.800386 | -3.502634 | -0.784629 |
| 68 | 1  | -6.442554 | -4.081831 | -0.543739 |
| 69 | 1  | -6.120124 | -2.850694 | -1.771126 |

-----  
2-PPi

B3LYP/6-31G(d)//B3LYP/6-31G(d):

HF = -2382.0556793 hartrees (-1494763.75931754 kcal/mol)

Imaginary Frequencies: none found

Zero-point correction = 0.567198 (Hartree/Particle)

mPW1PW91/6-31G(d)//B3LYP/6-31G(d):

HF = -2381.6918518 hartrees (-1494535.45392302 kcal/mol)

MPWB1K/6-31G(d)//B3LYP/6-31G(d):

HF = -2381.4125429 hartrees (-1494360.18479518 kcal/mol)

Coordinates (from last standard orientation):

-----

| Center<br>Number | Atomic<br>Number | Coordinates (Angstroms) |           |           |
|------------------|------------------|-------------------------|-----------|-----------|
|                  |                  | X                       | Y         | Z         |
| 1                | 6                | 0.394759                | 0.760122  | 1.731236  |
| 2                | 6                | -0.930629               | 1.007284  | 2.428338  |
| 3                | 6                | -0.324478               | -0.380729 | 2.496734  |
| 4                | 6                | -0.993204               | -1.241281 | 1.426117  |
| 5                | 6                | -1.305143               | -0.092681 | 0.434181  |
| 6                | 6                | 0.106711                | 0.518230  | 0.248032  |
| 7                | 1                | 1.751591                | -0.873469 | 2.121494  |
| 8                | 1                | 1.303531                | 1.237971  | 2.087528  |
| 9                | 1                | -0.314601               | -1.985886 | 0.991528  |
| 10               | 1                | -1.880833               | -1.767098 | 1.787300  |
| 11               | 1                | 0.795680                | -0.196800 | -0.219793 |
| 12               | 1                | 0.126864                | 1.436325  | -0.344980 |
| 13               | 1                | 0.038094                | -0.780648 | 3.440662  |
| 14               | 6                | -1.035735               | 1.891153  | 3.647304  |
| 15               | 1                | -1.923879               | 1.646776  | 4.242625  |
| 16               | 1                | -0.161090               | 1.774209  | 4.297667  |
| 17               | 1                | -1.099280               | 2.950166  | 3.369686  |
| 18               | 1                | -1.829060               | -0.386193 | -0.476916 |
| 19               | 6                | -2.028266               | 0.968394  | 1.332576  |
| 20               | 6                | -3.379666               | 0.485554  | 1.891646  |
| 21               | 1                | -4.074946               | 0.232060  | 1.085750  |
| 22               | 1                | -3.272251               | -0.389597 | 2.539295  |
| 23               | 1                | -3.847280               | 1.273900  | 2.493783  |
| 24               | 6                | -2.189004               | 2.359116  | 0.660482  |
| 25               | 1                | -1.209957               | 2.849641  | 0.611160  |
| 26               | 8                | 4.949522                | -1.792162 | 1.680103  |
| 27               | 15               | 3.668967                | -1.051333 | 1.108333  |
| 28               | 8                | 2.529150                | -1.483929 | 2.104757  |

-----

|    |    |           |           |           |
|----|----|-----------|-----------|-----------|
| 29 | 8  | 3.341858  | -1.729381 | -0.303461 |
| 30 | 8  | 3.808869  | 0.452880  | 0.975154  |
| 31 | 15 | 4.360632  | -1.619827 | -1.667200 |
| 32 | 8  | 3.822308  | -2.470581 | -2.740663 |
| 33 | 8  | 5.724028  | -2.257746 | -0.974810 |
| 34 | 8  | 4.639860  | -0.126514 | -1.806542 |
| 35 | 1  | 5.521235  | -2.099160 | 0.937218  |
| 36 | 1  | 5.880790  | -3.140443 | -1.352219 |
| 37 | 12 | 4.167870  | 1.399893  | -0.721670 |
| 38 | 8  | 5.028411  | 3.245891  | -0.760470 |
| 39 | 6  | 3.888171  | 3.686727  | -1.108065 |
| 40 | 1  | 3.762822  | 4.764172  | -1.289286 |
| 41 | 8  | 2.892026  | 2.912352  | -1.250213 |
| 42 | 6  | -2.795764 | 2.404094  | -0.761984 |
| 43 | 1  | -2.667315 | 3.438658  | -1.118633 |
| 44 | 1  | -2.194926 | 1.785004  | -1.435663 |
| 45 | 6  | -4.260366 | 2.060274  | -0.859657 |
| 46 | 6  | -4.884929 | 1.270041  | -1.748639 |
| 47 | 6  | -6.396958 | 1.143591  | -1.726854 |
| 48 | 1  | -6.800332 | 1.572078  | -2.657946 |
| 49 | 1  | -6.801024 | 1.751779  | -0.907409 |
| 50 | 6  | -4.187682 | 0.504993  | -2.848753 |
| 51 | 1  | -4.276478 | -0.578664 | -2.696727 |
| 52 | 1  | -4.647117 | 0.722633  | -3.822911 |
| 53 | 1  | -3.124084 | 0.740740  | -2.926500 |
| 54 | 1  | -4.886320 | 2.569435  | -0.123283 |
| 55 | 6  | -6.955574 | -0.296178 | -1.602377 |
| 56 | 1  | -8.050981 | -0.224285 | -1.689394 |
| 57 | 1  | -6.629075 | -0.897978 | -2.456507 |
| 58 | 6  | -6.613452 | -0.963395 | -0.296912 |
| 59 | 6  | -6.111620 | -2.190484 | -0.082947 |
| 60 | 1  | -6.829587 | -0.355419 | 0.584425  |
| 61 | 6  | -5.868840 | -2.692181 | 1.321516  |
| 62 | 1  | -4.815116 | -2.969903 | 1.467122  |
| 63 | 1  | -6.129084 | -1.942162 | 2.074942  |
| 64 | 1  | -6.457638 | -3.597964 | 1.525485  |
| 65 | 6  | -5.763085 | -3.184772 | -1.164399 |
| 66 | 1  | -4.712937 | -3.497432 | -1.080693 |
| 67 | 1  | -6.365471 | -4.098011 | -1.058158 |
| 68 | 1  | -5.920083 | -2.801164 | -2.175191 |
| 69 | 1  | -2.798019 | 2.991710  | 1.321304  |

---

IRC Plots  
For Scheme S4  
TS1→B

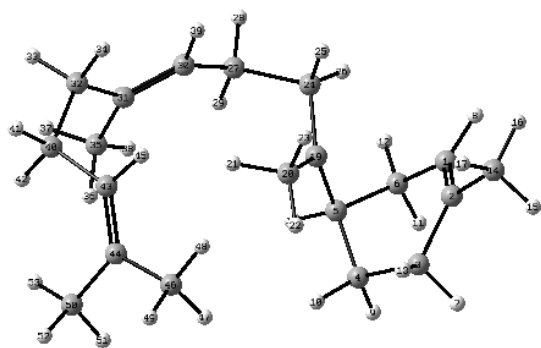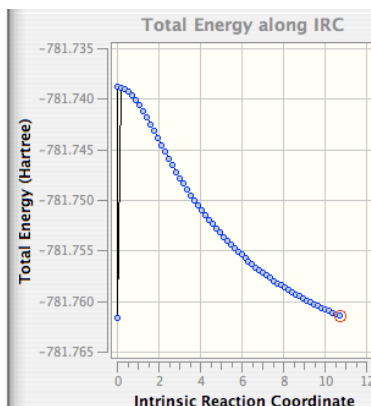

TS1→E

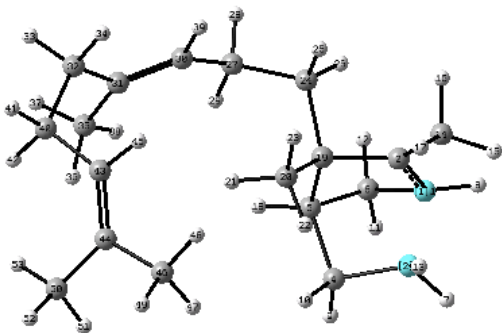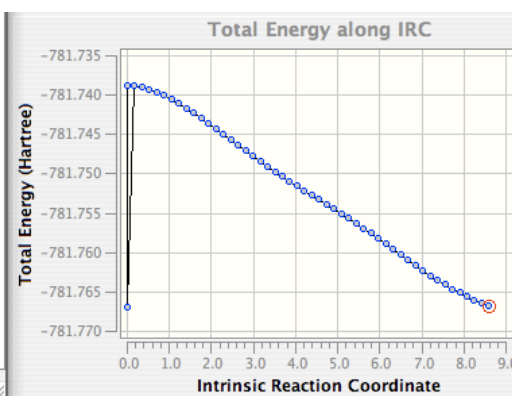

B = 1.67178 (C1 C3)

Inquire Select Atom 3

For Scheme S5

TS2→B-PPi: unsuccessful

TS2→A-PPi: unsuccessful

TS3→A-PPi

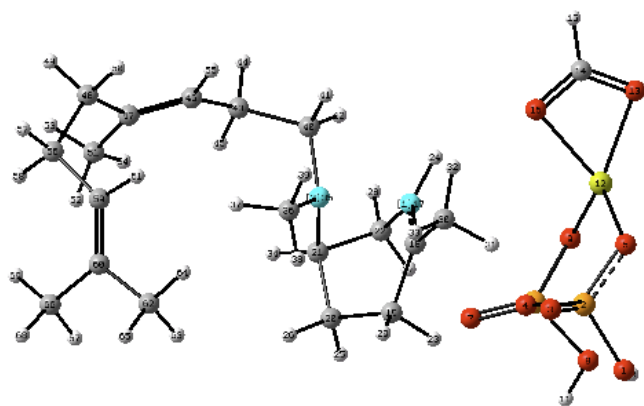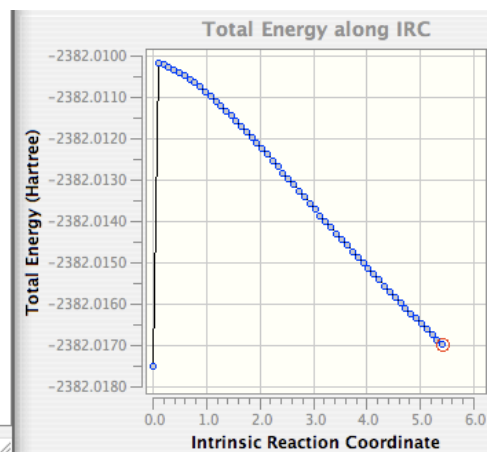

B = 1.93955 (C17 C35)

Inquire Select Atom 3

TS3→E-PPi

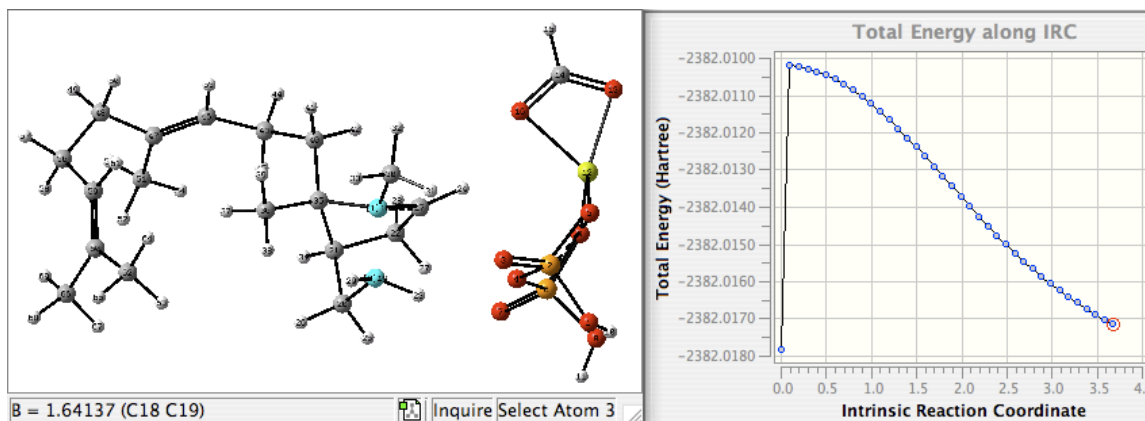

TS4→E-PPi: unsuccessful  
TS4→2-PPi: unsuccessful
